# Supplementary material for: Copper-catalyzed aryl ortho -C–H thiolation of aldehydes via a transient directing group strategy
Source: Royal Society of Chemistry journal article supplement (doi:10.1039/d5qo00472a), 2025-01-01

# Copper-Catalyzed Aryl *ortho*-C–H Thiolation of Aldehydes via a Transient Directing Group Strategy

Mingshun Mei,<sup>a</sup> Dongsheng Yi,<sup>a</sup> Fanyi Meng,<sup>a</sup> Junhao Tang,<sup>a</sup> and Yanghui Zhang<sup>\*a</sup>

School of Chemical Science and Engineering, Shanghai Key Laboratory of Chemical  
Assessment and Sustainability, Tongji University  
1239 Siping Road, Shanghai 200092 (China)  
E-mail: zhangyanghui@tongji.edu.cn

## Table of Contents

|                                                                                                   |    |
|---------------------------------------------------------------------------------------------------|----|
| 1. General information.....                                                                       | 2  |
| 2. Condition survey for the C–H thiolation of benzaldehydes.....                                  | 2  |
| 3. General procedure for the <i>ortho</i> -C(sp <sup>2</sup> )–H thiolation of benzaldehydes..... | 5  |
| 4. Gram-Scale Synthesis of Compound <b>3ae</b> .....                                              | 5  |
| 5. Procedures for product transformations and synthetic applications. ....                        | 6  |
| 5.1 Product transformations.....                                                                  | 6  |
| 5.2 Synthetic applications.....                                                                   | 7  |
| 6. Mechanistic studies.....                                                                       | 9  |
| 6.1 H/D exchange experiments.....                                                                 | 9  |
| 6.2 Intermolecular KIE experiments .....                                                          | 10 |
| 7. Characterization data of the products. ....                                                    | 11 |
| 8. References.....                                                                                | 28 |
| 9. <sup>1</sup> H NMR, <sup>13</sup> C NMR and <sup>19</sup> F NMR spectra.....                   | 29 |

# 1. General information.

$^1\text{H}$  NMR and  $^{13}\text{C}$  NMR spectra were recorded on Bruker ARX400 instrument (400 MHz) or Bruker DRX-600 instrument (600 MHz). Mass spectral data were obtained from an Agilent Technologies 6230 TOF LC/MS spectrometer in electrospray ionization (ESI<sup>+</sup>) mode. NMR spectra were recorded in  $\text{CDCl}_3$ .  $^1\text{H}$  NMR spectra were referenced to residual  $\text{CHCl}_3$  at 7.26 ppm, and  $^{13}\text{C}$  NMR spectra were referenced to the central peak of  $\text{CDCl}_3$  at 77.16 ppm. Chemical shifts ( $\delta$ ) are reported in ppm, and coupling constants ( $J$ ) are in Hertz (Hz). Multiplicities are reported using the following abbreviations: s = singlet, d = doublet, t = triplet, q = quartet, m = multiplet.

All reactions requiring anhydrous conditions were conducted in dried apparatus under an inert atmosphere of nitrogen. For reactions that require heating, an oil bath was used to warm up to the target temperatures in the process. All commercial materials were used without further purification unless there was special notice. All commercial aldehydes, were purchased from Sigma-Aldrich, Shanghai Haohong Scientific Co., Ltd, Tansoole, and Bidepharm. The disulfide derivatives<sup>[1]</sup> were prepared according to previously described methods.

# 2. Condition survey for the C–H thiolation of benzaldehydes

Table S1. Transient directing group survey<sup>a,b</sup>

| no TDG<br>n.d.             | <br>TDG <sub>1</sub> , NR  | <br>TDG <sub>2</sub> , 22% | <br>TDG <sub>3</sub> , 37%  | <br>TDG <sub>4</sub> , 48% | <br>TDG <sub>5</sub> , 12% |
|----------------------------|----------------------------|----------------------------|-----------------------------|----------------------------|----------------------------|
| <br>TDG <sub>6</sub> , 69% | <br>TDG <sub>7</sub> , 25% | <br>TDG <sub>8</sub> , 10% | <br>TDG <sub>9</sub> , NR   | <br>TDG <sub>10</sub> , NR |                            |
| <br>TDG <sub>11</sub> , NR | <br>TDG <sub>12</sub> , NR | <br>TDG <sub>13</sub> , NR | <br>TDG <sub>14</sub> , 34% | <br>TDG <sub>15</sub> , NR |                            |

<sup>a</sup>Reaction conditions: **1a** (0.2 mmol), **2a** (0.2 mmol),  $\text{Cu}(\text{OAc})_2$  (50 mol%), TDG (40 mol %), TMSOAc (2 equiv), DMSO (2 mL), 130 °C, 24 h,  $\text{N}_2$ . <sup>b</sup>Determined by  $^1\text{H}$  NMR analysis using  $\text{CH}_2\text{Br}_2$  as an internal standard. NR: no reaction.

**Table S2. Copper source survey<sup>a,b</sup>**

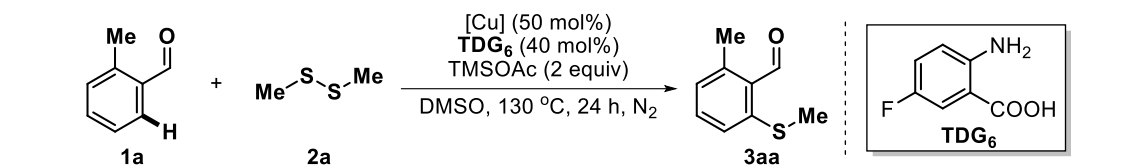

| Entry | [Cu]                 | Yield (%) |
|-------|----------------------|-----------|
| 1     | Cu(OAc) <sub>2</sub> | 69        |
| 2     | Cu(TFA) <sub>2</sub> | 22        |
| 3     | CuI                  | NR        |
| 4     | CuBr <sub>2</sub>    | NR        |
| 5     | CuF <sub>2</sub>     | trace     |
| 6     | Cu(OTf) <sub>2</sub> | trace     |

<sup>a</sup>Reaction conditions: **1a** (0.2 mmol), **2a** (0.2 mmol), [Cu] (50 mol%), **TDG<sub>6</sub>** (40 mol %), TMSOAc (2 equiv), DMSO (2 mL), 130 °C, 24 h, N<sub>2</sub>. <sup>b</sup>Determined by <sup>1</sup>H NMR analysis using CH<sub>2</sub>Br<sub>2</sub> as an internal standard. NR: no reaction.

**Table S3. Solvent survey<sup>a,b</sup>**

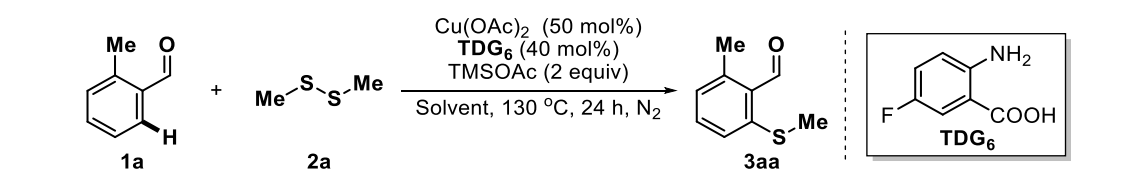

| Entry | Solvent         | Yield (%) |
|-------|-----------------|-----------|
| 1     | DMSO            | 69        |
| 2     | NMP             | trace     |
| 3     | THF             | NR        |
| 4     | Toluene         | NR        |
| 5     | DCE             | NR        |
| 6     | MeCN            | NR        |
| 7     | HFIP            | 13        |
| 8     | DMSO/HFIP (1:1) | 15        |

<sup>a</sup>Reaction conditions: **1a** (0.2 mmol), **2a** (0.2 mmol), [Cu] (50 mol%), **TDG<sub>6</sub>** (40 mol %), TMSOAc (2 equiv), solvent (2 mL), 130 °C, 24 h, N<sub>2</sub>. <sup>b</sup>Determined by <sup>1</sup>H NMR analysis using CH<sub>2</sub>Br<sub>2</sub> as an internal standard. NR: no reaction.

**Table S4. Additives survey<sup>a,b</sup>**

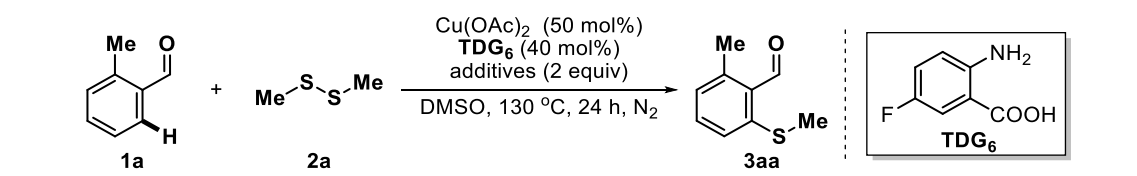

| Entry | Additive | Yield (%) <sup>b</sup> |
|-------|----------|------------------------|
| 1     | none     | 32                     |

|    |                                 |       |
|----|---------------------------------|-------|
| 2  | TMSOAc                          | 69    |
| 3  | KOAc                            | NR    |
| 4  | Cs <sub>2</sub> CO <sub>3</sub> | NR    |
| 5  | Pyridine                        | 46    |
| 6  | TEA                             | NR    |
| 7  | AcOH                            | NR    |
| 8  | Ad-COOH                         | trace |
| 9  | Ag <sub>2</sub> CO <sub>3</sub> | NR    |
| 10 | MnO <sub>2</sub>                | 10    |
| 11 | CuF <sub>2</sub>                | 78    |
| 12 | AgF                             | trace |
| 13 | DTBP                            | NR    |

<sup>a</sup>Reaction conditions: **1a** (0.2 mmol), **2a** (0.2 mmol), Cu(OAc)<sub>2</sub> (1 equiv), **TDG<sub>6</sub>** (40 mol %), additives (2 equiv), DMSO (1.5 mL), 130 °C, 18 h, N<sub>2</sub>. <sup>b</sup>Determined by <sup>1</sup>H NMR analysis using CH<sub>2</sub>Br<sub>2</sub> as an internal standard. NR: no reaction.

**Table S5. Further condition optimization<sup>a,b</sup>**

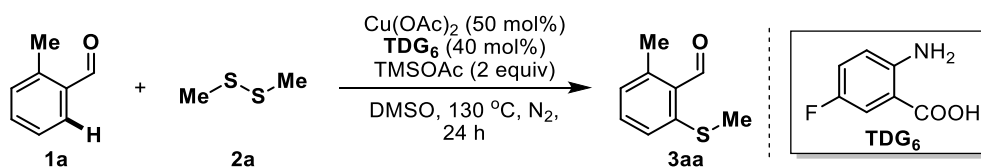

| Entry | Variation                                   | Yield (%) <sup>b</sup> |
|-------|---------------------------------------------|------------------------|
| 1     | none                                        | 69                     |
| 2     | <b>1a</b> (1.2 equiv), <b>2a</b> (0.2 mmol) | 60                     |
| 3     | <b>1a</b> (0.2 mmol), <b>2a</b> (1.2 equiv) | 46                     |
| 4     | <b>1a</b> (0.2 mmol), <b>2a</b> (0.8 equiv) | 55                     |
| 5     | Cu(OAc) <sub>2</sub> (25 mol%)              | 34                     |
| 6     | Cu(OAc) <sub>2</sub> (100 mol%)             | 71                     |
| 7     | <b>TDG<sub>6</sub></b> (20 mol%)            | 10                     |
| 8     | TMSOAc (1 equiv)                            | 41                     |
| 9     | 120 °C                                      | 40                     |
| 10    | 18 h                                        | 63                     |
| 11    | DMSO = 1 mL                                 | 44                     |
| 12    | DMSO = 3 mL                                 | 75 (71 <sup>c</sup> )  |
| 13    | DMSO = 4 mL                                 | 49                     |

<sup>a</sup>Standard reaction conditions: **1a** (0.2 mmol), **2a** (0.2 mmol), Cu(OAc)<sub>2</sub> (1 equiv), **TDG<sub>6</sub>** (40 mol %), DMSO (1.5 mL), 130 °C, 24 h, N<sub>2</sub>. <sup>b</sup>Determined by <sup>1</sup>H NMR analysis using CH<sub>2</sub>Br<sub>2</sub> as an internal standard. <sup>c</sup>Isolated yield.



### 3. General procedure for the *ortho*-C(sp<sup>2</sup>)-H thiolation of benzaldehydes.

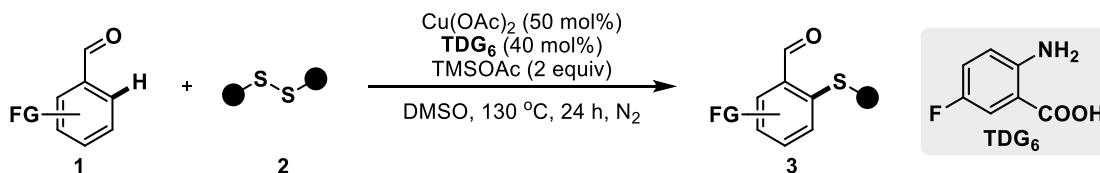

A 25 mL Schlenk-type tube (with a Teflon screw cap and a side arm) equipped with a magnetic stir bar was charged with Cu(OAc)<sub>2</sub> (18.1 mg, 0.1 mmol, 50 mol%), TDG<sub>6</sub> (12.4 mg, 0.08 mmol, 40 mol%), TMSOAc (60.0  $\mu$ L, 0.4 mmol, 2.0 equiv), benzaldehydes (0.2 mmol, 1.0 equiv), and disulfides (0.2 mmol, 1.0 equiv), followed by the addition of DMSO (3.0 mL). The reaction mixture was frozen with liquid nitrogen and then the tube was evacuated and backfilled with nitrogen (6 times). After being stirred at 130 °C for 24 hours, the reaction mixture was diluted with EtOAc (20 mL) and then treated with saturated Na<sub>2</sub>S aqueous solution (10 mL). The mixture was filtered through a pad of celite, and the filtrate was washed with brine twice. The organic layer was dried over Na<sub>2</sub>SO<sub>4</sub> and concentrated under vacuum. The crude product was purified by preparative silica gel TLC with petroleum ether/EtOAc to afford **3**.

### 4. Gram-Scale Synthesis of Compound 3ae.

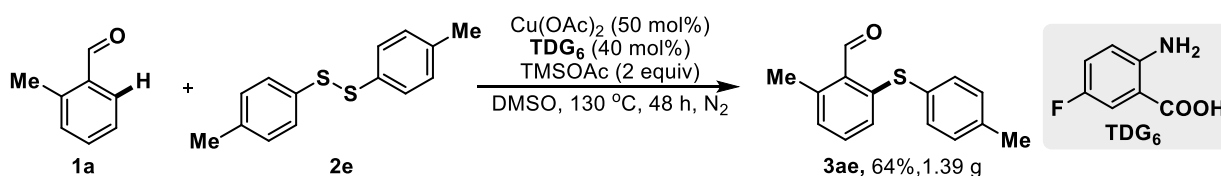

A 250 mL Schlenk-type tube (with a Teflon screw cap and a side arm) equipped with a magnetic stir bar was charged with Cu(OAc)<sub>2</sub> (815 mg, 4.5 mmol, 50 mol%), TDG<sub>6</sub> (558 mg, 3.6 mmol, 40 mol%), TMSOAc (2.7 mL, 18 mmol, 2.0 equiv), 2-methylbenzaldehyde (1.04 mL, 9 mmol, 1.0 equiv), and *p*-tolyl disulfide **2e** (846 mg, 9 mmol, 1.0 equiv), followed by the addition of DMSO (60 mL). The reaction mixture was frozen with liquid nitrogen and then the tube was evacuated and backfilled with nitrogen (6 times). After being stirred at 130 °C for 48 hours, the reaction mixture was diluted with EtOAc (120 mL) and then treated with saturated Na<sub>2</sub>S aqueous solution (60 mL). The mixture was filtered through a pad of celite, and the filtrate was washed twice with brine. The organic layer was dried over Na<sub>2</sub>SO<sub>4</sub> and concentrated under vacuum. The crude product was purified by silica gel column chromatography with petroleum ether/EtOAc (20:1) to afford **3ae** (1.39 g, 64% yield).

## 5. Procedures for product transformations and synthetic applications.

### 5.1 Product transformations

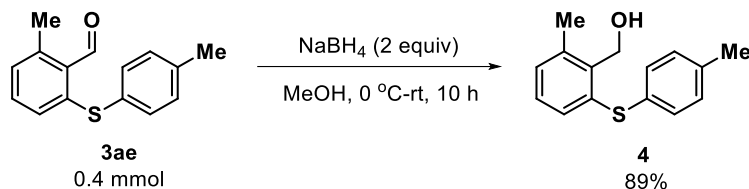

To a stirred solution of **3ae** (96.8 mg, 0.4 mmol, 1.0 equiv) in MeOH (3 mL) at 0 °C was added  $\text{NaBH}_4$  (30.3 mg, 0.8 mmol, 2.0 equiv). After the reaction mixture was stirred at room temperature for 10 hours, it was diluted with EtOAc (20 mL) and then quenched by adding saturated aqueous  $\text{NaHCO}_3$  solution. The reaction mixture was extracted with EtOAc (5 mL  $\times$  3). The combined organic phases were washed with brine, dried over  $\text{Na}_2\text{SO}_4$ , filtered and concentrated under vacuum. The crude product was purified by preparative silica gel TLC with petroleum ether/EtOAc (20:1) to afford **4** (87 mg, 89%).

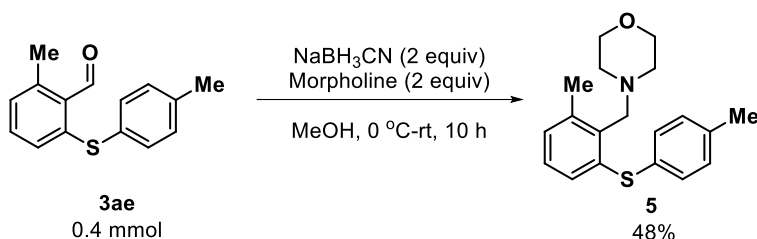

To a stirred solution of **3ae** (96.8 mg, 0.4 mmol, 1.0 equiv), morpholine (70  $\mu\text{L}$ , 0.8 mmol, 2.0 equiv) in MeOH (3 mL) at 0 °C was added  $\text{NaBH}_3\text{CN}$  (50.3 mg, 0.8 mmol, 2.0 equiv). After the reaction mixture was stirred at room temperature for 10 hours, it was diluted with EtOAc (20 mL) and then quenched by adding saturated  $\text{NaHCO}_3$  solution. The mixture was extracted with EtOAc (5 mL  $\times$  3). The combined organic phases were washed with brine, dried over  $\text{Na}_2\text{SO}_4$ , filtered and concentrated under vacuum. The crude product was purified by preparative silica gel TLC with petroleum ether/EtOAc (20:1) to afford **5** (60 mg, 48%).

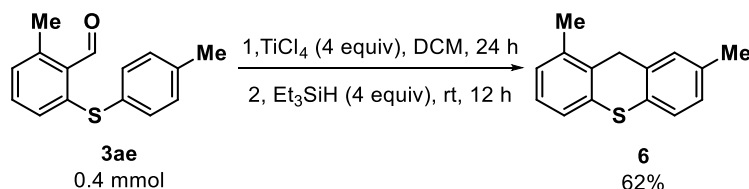

To a solution of **3ae** (96.8 mg, 0.4 mmol, 1 equiv) in DCM (3 mL) was added  $\text{TiCl}_4$  (176  $\mu\text{L}$ , 1.6 mmol, 4 equiv.) at room temperature. After the reaction mixture was stirred at room temperature for 24 hours,  $\text{Et}_3\text{SiH}$  (256  $\mu\text{L}$ , 1.6 mmol, 4 equiv.) was added and the reaction mixture was stirred for another 12 hours. Next, the reaction mixture was diluted with DCM (20 mL) and quenched by the addition of

H<sub>2</sub>O (5 mL). The mixture was extracted with DCM (5 mL × 3). The combined organic phases were washed with brine, dried over Na<sub>2</sub>SO<sub>4</sub>, filtered, and concentrated under vacuum. The crude product was purified by preparative silica gel TLC with petroleum ether/EtOAc (50:1) to afford **6** (56 mg, 62%).

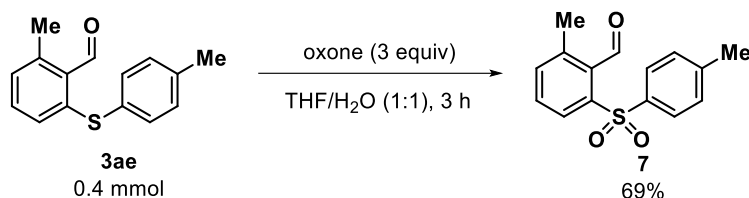

To a solution of **3ae** (96.8 mg, 0.4 mmol, 1 equiv) in THF (3 mL) and H<sub>2</sub>O (3 mL) was added Oxone monopersulfate (415.5 mg, 1.2 mmol, 3 equiv). After the reaction mixture was stirred at room temperature for 3 hours, it was diluted with EtOAc (20 mL) and then quenched by the addition of H<sub>2</sub>O (5 mL). The mixture was extracted with EtOAc (5 mL × 3). The combined organic phases were washed with brine, dried over Na<sub>2</sub>SO<sub>4</sub>, filtered and concentrated under vacuum. The crude product was purified by preparative silica gel TLC with petroleum ether/EtOAc (5:1) to afford **7** (76 mg, 69%).

## 5.2 Synthetic applications

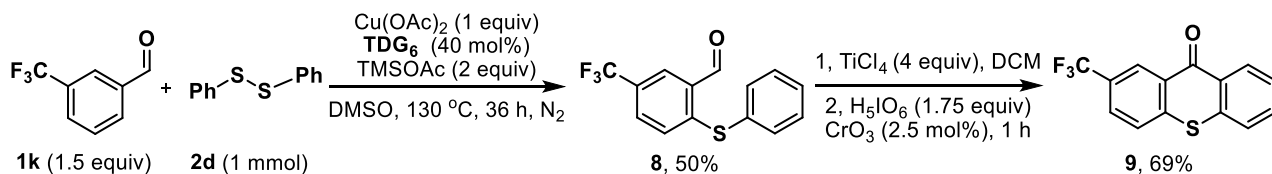

Procedure for the synthesis of **8**. A 50 mL Schlenk-type tube (with a Teflon screw cap and a side arm) equipped with a magnetic stir bar was charged with Cu(OAc)<sub>2</sub> (181 mg, 1.0 mmol, 1.0 equiv), **TDG6** (62 mg, 0.4 mmol, 40 mol%), TMSOAc (0.3 mL, 2 mmol, 2.0 equiv), 3-(trifluoromethyl)benzaldehyde **1k** (0.20 mL, 1.5 mmol, 1.5 equiv), and phenyl disulfide **2d** (218 mg, 1 mmol, 1.0 equiv), followed by the addition of DMSO (15 mL). The reaction mixture was frozen with liquid nitrogen and then the tube was evacuated and backfilled with nitrogen (6 times). After being stirred at 130 °C for 36 hours, the reaction mixture was diluted with EtOAc (20 mL) and then treated with saturated aqueous Na<sub>2</sub>S solution (10 mL). The mixture was filtered through a pad of celite, and the filtrate was washed with brine twice. The organic layer was dried over Na<sub>2</sub>SO<sub>4</sub> and concentrated under vacuum. The crude product was purified by silica gel column chromatography with petroleum ether/EtOAc (20:1) to afford **8** (141 mg, 50% yield).

Procedure for the synthesis of **9**. To a solution of **8** (141 mg, 0.5 mmol, 1 equiv.) in DCM (1 mL) was added TiCl<sub>4</sub> (1 M solution in DCM, 2 mL, 4 equiv.) at room temperature. After the reaction mixture was stirred at room temperature for 24 hours, it was quenched by the addition of H<sub>2</sub>O (2 mL).

The reaction mixture was extracted three times with DCM (20 mL), washed with brine, dried over Na<sub>2</sub>SO<sub>4</sub>, filtered, and concentrated under vacuum. The crude product was transferred to a solution of H<sub>5</sub>IO<sub>6</sub> (200 mg, 0.87 mmol, 1.75 equiv.) and CrO<sub>3</sub> (1.3 mg, 0.013 mmol, 2.5%) in acetonitrile (3 mL). The reaction mixture was stirred at room temperature for 1 hours, after which it was diluted with DCM (20 mL) and then washed with brine. The organic layer was dried over Na<sub>2</sub>SO<sub>4</sub> and concentrated under vacuum. The crude product was purified by preparative silica gel TLC with petroleum ether/EtOAc (20:1) to afford **9** (96 mg, 69%).

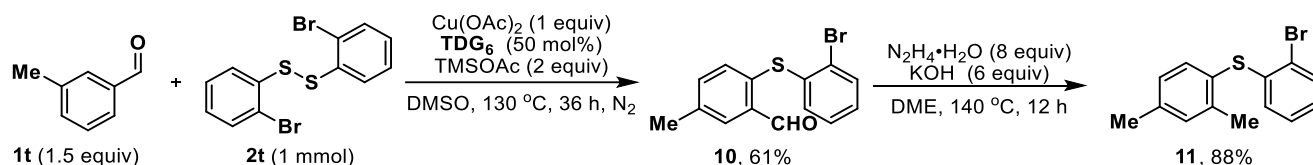

Procedure for the synthesis of **10**. A 50 mL Schlenk-type tube (with a Teflon screw cap and a side arm) equipped with a magnetic stir bar was charged with Cu(OAc)<sub>2</sub> (181 mg, 1.0 mmol, 1.0 equiv), **TDG**<sub>6</sub> (62 mg, 0.4 mmol, 40 mol%), TMSOAc (0.3 mL, 2 mmol, 2.0 equiv), 3-methylbenzaldehyde **1t** (0.18 mL, 1.5 mmol, 1.5 equiv), and phenyl disulfide **2t** (218 mg, 1 mmol, 1.0 equiv), followed by the addition of DMSO (15 mL). The reaction mixture was frozen with liquid nitrogen and then the tube was evacuated and backfilled with nitrogen (6 times). After being stirred at 130 °C for 36 hours, the reaction mixture was diluted with EtOAc (20 mL) and then treated with saturated Na<sub>2</sub>S aqueous solution (10 mL). The mixture was filtered through a pad of celite, and the filtrate was washed with brine twice. The organic layer was dried over Na<sub>2</sub>SO<sub>4</sub> and concentrated under vacuum. The crude product was purified by silica gel column chromatography with petroleum ether/EtOAc (20:1) to afford **10** (187 mg, 61% yield).

Procedure for the synthesis of **11**. A round-bottom flask (with Dean-Stark apparatus) equipped with a magnetic stir bar was charged with aldehyde **10** (184 mg, 0.6 mmol, 1 equiv), potassium hydroxide powder (202 mg, 3.6 mmol, 6 equiv) and hydrazine hydrate (291  $\mu$ L, 6 mmol, 10 equiv), followed by the addition of diethylene glycol (5 mL). After being stirred at 140 °C for 12 hours, the reaction mixture was diluted with EtOAc (20 mL) and then quenched by the addition of 1 M HCl (2 mL). The mixture was extracted with EtOAc (3  $\times$  10 mL). The combined organic phases were dried over Na<sub>2</sub>SO<sub>4</sub>, filtered and concentrated under vacuum. The crude product was purified by preparative silica gel TLC with petroleum ether/EtOAc (50:1) to afford **11** (156 mg, 88%).

## 6. Mechanistic studies.

### 6.1 H/D exchange experiments

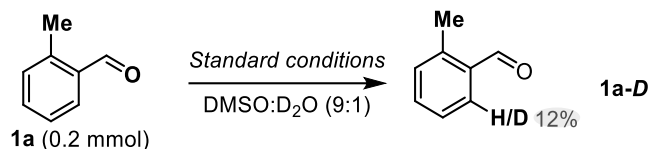

A 25 mL Schlenk-type tube (with a Teflon screw cap and a side arm) equipped with a magnetic stir bar was charged with Cu(OAc)<sub>2</sub> (18.1 mg, 0.1 mmol, 50 mol%), **TDG**<sub>6</sub> (12.4 mg, 0.08 mmol, 40 mol%), TMSOAc (60.0 uL, 0.4 mmol, 2.0 equiv), benzaldehyde **1a** (21 uL, 0.2 mmol, 1.0 equiv), followed by the addition of DMSO/D<sub>2</sub>O (2.7 mL/0.3 mL). The reaction mixture was frozen with liquid nitrogen and then the tube was evacuated and backfilled with nitrogen (6 times). After being stirred at 130 °C for 24 hours, the reaction mixture was diluted with EtOAc (20 mL) and then treated with saturated Na<sub>2</sub>S aqueous solution (10 mL). The mixture was filtered through a pad of celite, and the filtrate was washed twice with brine. The organic phase was dried over Na<sub>2</sub>SO<sub>4</sub> and concentrated under vacuum. The crude product was purified by preparative silica gel TLC with petroleum ether/EtOAc (v : v = 20 : 1) to afford a mixture of **1a** and **1a-d**. The deuterium ratio was determined to be 12% D based on <sup>1</sup>H NMR analysis.

MMS-03-191-2DH, 10, f1 d

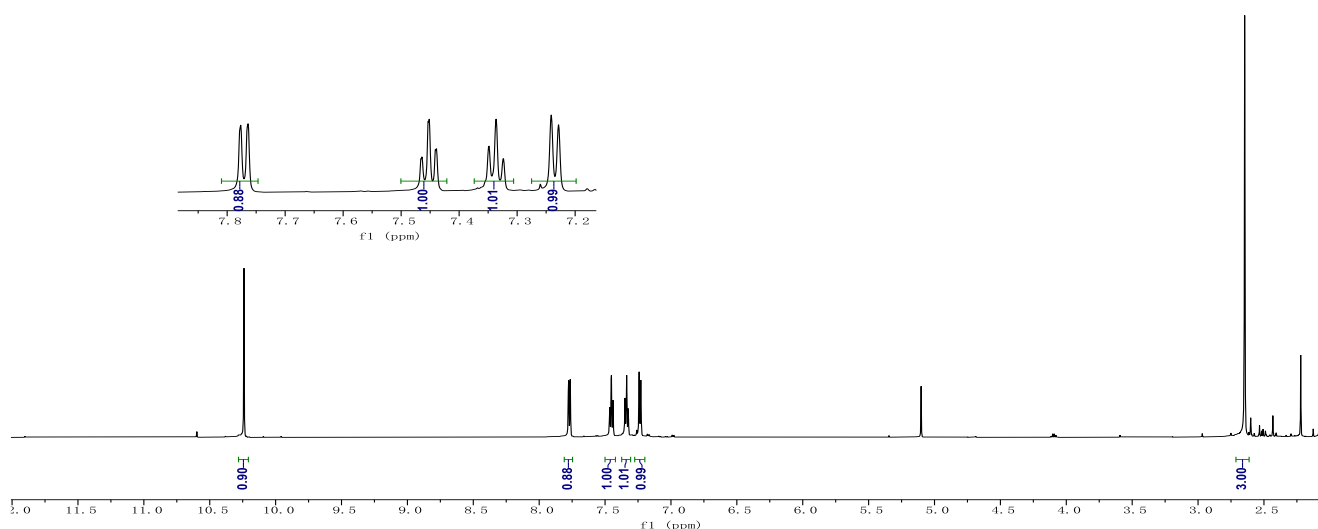

## 6.2 Intermolecular KIE experiments

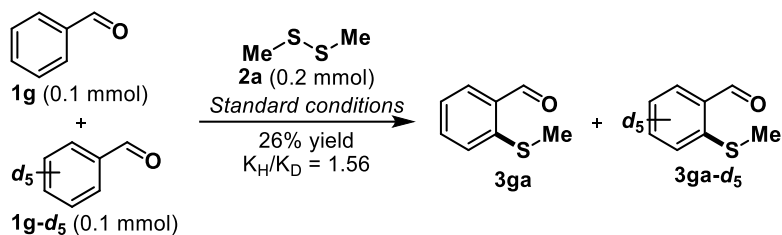

A 25 mL Schlenk-type tube (with a Teflon screw cap and a side arm) equipped with a magnetic stir bar was charged with  $\text{Cu}(\text{OAc})_2$  (18.1 mg, 0.1 mmol, 50 mol%), **TDG6** (12.4 mg, 0.08 mmol, 40 mol%), TMSOAc (60.0  $\mu\text{L}$ , 0.4 mmol, 2.0 equiv), dimethyl disulfide (0.2 mmol, 1.0 equiv), **1g** (10.6 mg, 0.1 mmol) and **1g-d<sub>5</sub>** (11.1 mg, 0.1 mmol), followed by the addition of DMSO (3.0 mL). The reaction mixture was frozen with liquid nitrogen and then the tube was evacuated and backfilled with nitrogen (6 times). After being stirred at 130 °C for 24 hours, the reaction mixture was diluted with EtOAc (20 mL) and then treated with saturated  $\text{Na}_2\text{S}$  aqueous solution (10 mL). The mixture was filtered through a pad of celite, and the filtrate was washed twice with brine. The organic phase was dried over  $\text{Na}_2\text{SO}_4$  and concentrated under vacuum. The crude product was purified by preparative silica gel TLC with petroleum ether/EtOAc ( $v : v = 20 : 1$ ) to afford product **3ga** and **3ga-d<sub>5</sub>** in 26% total yield. The ratio of **3ga** and **3ga-d<sub>5</sub>** was 0.61:0.39 = 1.56 based on  $^1\text{H}$  NMR analysis.  $^1\text{H}$  NMR (400 MHz,  $\text{CDCl}_3$ )  $\delta$  10.26 (s, 1H), 7.82–7.80 (m, 0.61H), 7.56–7.52 (m, 0.62H), 7.38–7.26 (m, 1.25H), 2.50 (s, 3H).

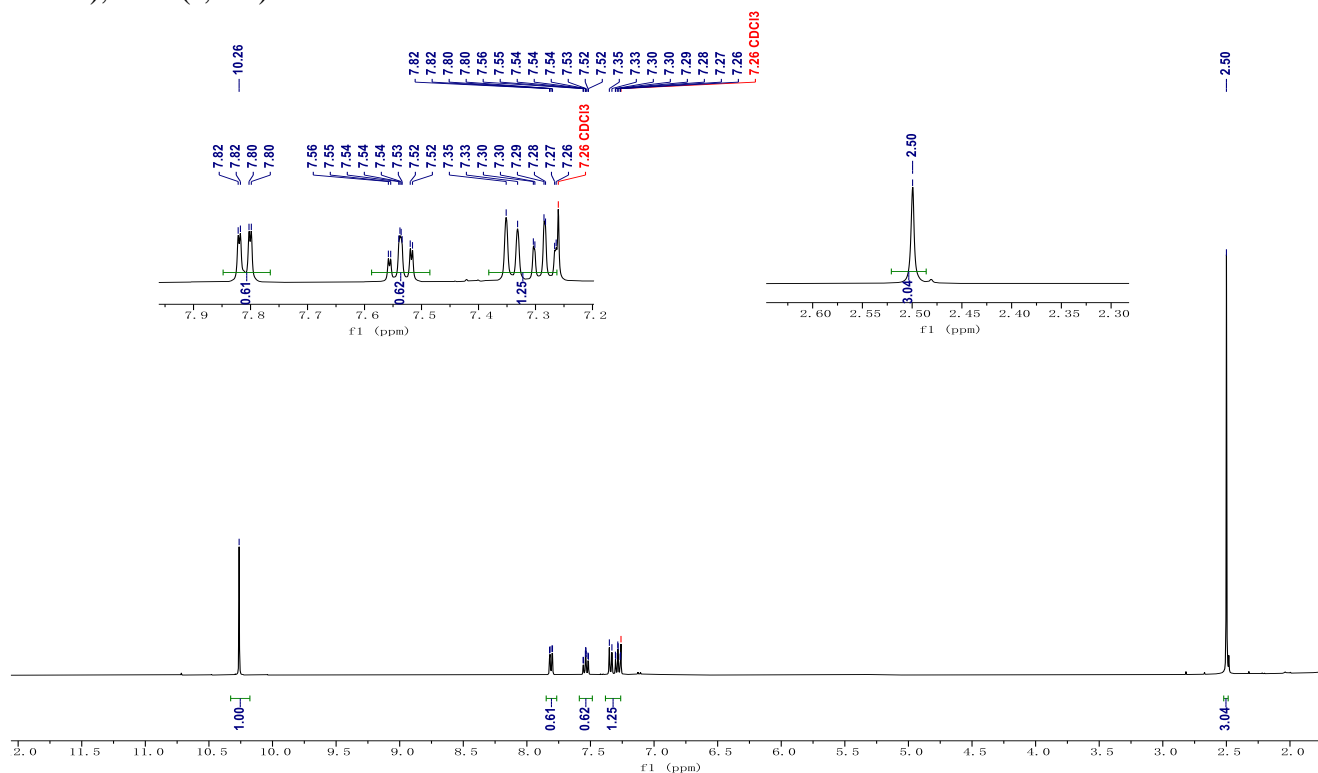

## 7. Characterization data of the products.

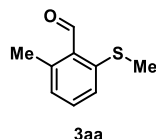

### 2-Methyl-6-(methylthio)benzaldehyde (3aa)<sup>[2]</sup>:

Purified by preparative thin-layer chromatograph using petroleum ether : ethyl acetate = 20 : 1 as the eluent to give the title compound as a pale yellow oil (24 mg, 71%); <sup>1</sup>H NMR (400 MHz, CDCl<sub>3</sub>) δ 10.61 (s, 1H), 7.36 (t, *J* = 7.8 Hz, 1H), 7.18 (d, *J* = 8.1 Hz, 1H), 6.99 (d, *J* = 7.5 Hz, 1H), 2.61 (s, 3H), 2.44 (s, 3H); <sup>13</sup>C NMR (101 MHz, CDCl<sub>3</sub>) δ 191.6, 144.3, 142.4, 133.1, 131.1, 127.9, 123.9, 20.3, 16.3; HRMS (ESI-TOF) *m/z*: [M+Na]<sup>+</sup> Calcd for C<sub>9</sub>H<sub>10</sub>OSNa<sup>+</sup>: 189.0345, Found: 189.0346.

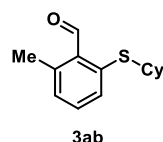

### 2-(Cyclohexylthio)-6-methylbenzaldehyde (3ab):

Purified by preparative thin-layer chromatograph using petroleum ether : ethyl acetate = 20 : 1 as the eluent to give the title compound as a pale yellow oil (29 mg, 61%); <sup>1</sup>H NMR (600 MHz, CDCl<sub>3</sub>) δ 10.77 (s, 1H), 7.39 (d, *J* = 7.9 Hz, 1H), 7.34 (t, *J* = 7.6 Hz, 1H), 7.12 (d, *J* = 7.4 Hz, 1H), 3.07 (tt, *J* = 10.6, 3.7 Hz, 1H), 2.57 (s, 3H), 1.98–1.93 (m, 2H), 1.79–1.74 (m, 2H), 1.62–1.60 (dd, *J* = 10.5, 5.7 Hz, 2H), 1.42–1.36 (m, 2H), 1.36–1.29 (m, 2H); <sup>13</sup>C NMR (151 MHz, CDCl<sub>3</sub>) δ 194.4, 141.4, 140.5, 135.0, 132.6, 131.3, 130.6, 48.0, 33.3, 26.1, 25.8, 21.2; HRMS (ESI-TOF) *m/z*: [M+H]<sup>+</sup> Calcd for C<sub>14</sub>H<sub>19</sub>OS<sup>+</sup>: 235.1151, Found: 235.1146.

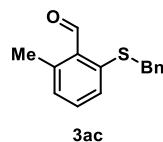

### 2-(Benzylthio)-6-methylbenzaldehyde (3ac)<sup>[3]</sup>:

Purified by preparative thin-layer chromatograph using petroleum ether : ethyl acetate = 20 : 1 as the eluent to give the title compound as a pale yellow oil (28 mg, 57%); <sup>1</sup>H NMR (600 MHz, CDCl<sub>3</sub>) δ 10.59 (s, 1H), 7.36–7.27 (m, 6H), 7.25–7.23 (m, 1H), 7.07 (d, *J* = 7.2 Hz, 1H), 4.11 (s, 2H), 2.58 (s, 3H); <sup>13</sup>C NMR (151 MHz, CDCl<sub>3</sub>) δ 192.8, 142.1, 142.0, 136.5, 133.0, 133.0, 129.6, 129.1, 128.7, 128.0, 127.6, 39.5, 20.7; HRMS (ESI-TOF) *m/z*: [M+Na]<sup>+</sup> Calcd for C<sub>15</sub>H<sub>14</sub>OSNa<sup>+</sup>: 265.0658, Found:

265.0662.

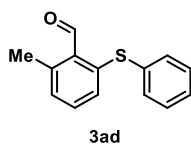

### 2-Methyl-6-(phenylthio)benzaldehyde (3ad)<sup>[3]</sup>:

Purified by preparative thin-layer chromatograph using petroleum ether : ethyl acetate = 20 : 1 as the eluent to give the title compound as a pale yellow oil (27 mg, 59%); **<sup>1</sup>H NMR** (600 MHz, CDCl<sub>3</sub>) δ 10.69 (s, 1H), 7.41–7.39 (m, 2H), 7.38–7.33 (m, 3H), 7.27–7.24 (m, 1H), 7.08 (d, *J* = 7.4 Hz, 1H), 6.98 (d, *J* = 7.9 Hz, 1H), 2.64 (s, 3H); **<sup>13</sup>C NMR** (151 MHz, CDCl<sub>3</sub>) δ 192.6, 142.3, 142.2, 134.3, 133.2, 133.0, 132.3, 129.9, 129.7, 129.6, 128.3, 20.6; **HRMS** (ESI-TOF) *m/z*: [M+Na]<sup>+</sup> Calcd for C<sub>14</sub>H<sub>12</sub>OSNa<sup>+</sup>: 251.0501, Found: 251.0497.

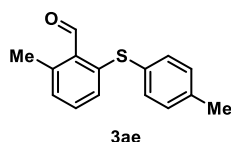

### 2-Methyl-6-(*p*-tolylthio)benzaldehyde (3ae):

Purified by preparative thin-layer chromatograph using petroleum ether : ethyl acetate = 20 : 1 as the eluent to give the title compound as a pale yellow solid (34 mg, 71%); **<sup>1</sup>H NMR** (400 MHz, CDCl<sub>3</sub>) δ 10.69 (s, 1H), 7.35–7.30 (m, 2H), 7.24–7.17 (m, 3H), 7.03 (d, *J* = 7.6 Hz, 1H), 6.91 (d, *J* = 8.1 Hz, 1H), 2.63 (s, 3H), 2.37 (s, 3H); **<sup>13</sup>C NMR** (101 MHz, CDCl<sub>3</sub>) δ 192.3, 143.4, 142.1, 138.8, 133.7, 133.0, 131.8, 130.6, 130.2, 129.4, 128.2, 21.3, 20.5; **HRMS** (ESI-TOF) *m/z*: [M+H]<sup>+</sup> Calcd for C<sub>15</sub>H<sub>15</sub>OS<sup>+</sup>: 243.0838, Found: 243.0838.

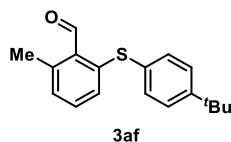

### 2-((4-Methoxyphenyl)thio)-6-methylbenzaldehyde (3af):

Purified by preparative thin-layer chromatograph using petroleum ether : ethyl acetate = 20 : 1 as the eluent to give the title compound as a pale yellow oil (42 mg, 75%); **<sup>1</sup>H NMR** (600 MHz, CDCl<sub>3</sub>) δ 10.72 (s, 1H), 7.43–7.40 (m, 2H), 7.39–7.35 (m, 2H), 7.26 (t, *J* = 7.7 Hz, 1H), 7.07 (d, *J* = 7.5 Hz, 1H), 6.99 (d, *J* = 8.0 Hz, 1H), 2.66 (s, 3H), 1.35 (s, 9H); **<sup>13</sup>C NMR** (151 MHz, CDCl<sub>3</sub>) δ 192.5, 151.8, 143.1, 142.1, 133.2, 133.1, 131.9, 130.2, 129.5, 128.4, 126.8, 34.8, 31.4, 20.6; **HRMS** (ESI-TOF) *m/z*: [M+Na]<sup>+</sup> Calcd for C<sub>18</sub>H<sub>20</sub>OSNa<sup>+</sup>: 307.1127, Found: 307.1111.



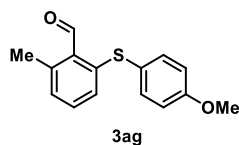

### 2-((4-Methoxyphenyl)thio)-6-methylbenzaldehyde (3ag):

Purified by preparative thin-layer chromatograph using petroleum ether : ethyl acetate = 20 : 1 as the eluent to give the title compound as a pale yellow solid (29 mg, 56%); **<sup>1</sup>H NMR** (600 MHz, CDCl<sub>3</sub>) δ 10.69 (s, 1H), 7.42 (d, *J* = 8.7 Hz, 2H), 7.18 (t, *J* = 7.8 Hz, 1H), 6.98 (d, *J* = 7.5 Hz, 1H), 6.94 (d, *J* = 8.8 Hz, 2H), 6.79 (d, *J* = 8.1 Hz, 1H), 3.84 (s, 3H), 2.63 (s, 3H); **<sup>13</sup>C NMR** (151 MHz, CDCl<sub>3</sub>) δ 191.9, 160.5, 145.0, 142.3, 136.6, 133.1, 130.9, 128.5, 126.6, 123.3, 115.5, 55.5, 20.4; **HRMS** (ESI-TOF) *m/z*: [M+Na]<sup>+</sup> Calcd for C<sub>15</sub>H<sub>14</sub>O<sub>2</sub>SNa<sup>+</sup>: 281.0607, Found: 281.0603.

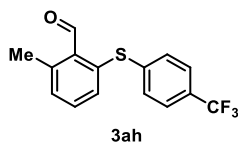

### 2-Methyl-6-((4-(trifluoromethyl)phenyl)thio)benzaldehyde (3ah):

Purified by preparative thin-layer chromatograph using petroleum ether : ethyl acetate = 20 : 1 as the eluent to give the title compound as a pale yellow solid (39 mg, 67%); **<sup>1</sup>H NMR** (600 MHz, CDCl<sub>3</sub>) δ 10.66 (s, 1H), 7.55 (d, *J* = 8.4 Hz, 2H), 7.39–7.34 (m, 3H), 7.22 (d, *J* = 7.6 Hz, 1H), 7.16 (d, *J* = 7.9 Hz, 1H), 2.65 (s, 3H); **<sup>13</sup>C NMR** (101 MHz, CDCl<sub>3</sub>) δ 192.9, 142.4, 140.9, 138.6, 133.9, 133.5, 131.8, 131.5, 130.6, 129.5 (q, *J* = 33.1, Hz), 126.4 (q, *J* = 3.9 Hz), 124.1 (q, *J* = 187.9 Hz), 20.8; **<sup>19</sup>F NMR** (565 MHz, CDCl<sub>3</sub>) δ -62.64; **HRMS** (ESI-TOF) *m/z*: [M+H]<sup>+</sup> Calcd for C<sub>15</sub>H<sub>12</sub>F<sub>3</sub>OS<sup>+</sup>: 297.0555, Found: 297.0549.

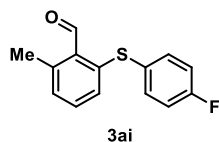

### 2-((4-Fluorophenyl)thio)-6-methylbenzaldehyde (3ai):

Purified by preparative thin-layer chromatograph using petroleum ether : ethyl acetate = 20 : 1 as the eluent to give the title compound as a pale yellow solid (40 mg, 81%); **<sup>1</sup>H NMR** (400 MHz, CDCl<sub>3</sub>) δ 10.68 (s, 1H), 7.48–7.39 (m, 2H), 7.24 (t, *J* = 7.8 Hz, 1H), 7.12–7.03 (m, 3H), 6.86 (d, *J* = 8.1 Hz, 1H), 2.64 (s, 3H); **<sup>13</sup>C NMR** (101 MHz, CDCl<sub>3</sub>) δ 192.1, 163.2 (d, *J* = 249.4 Hz), 143.0, 142.4, 136.0 (d, *J* = 8.4 Hz), 133.2, 131.7, 129.5, 129.0 (d, *J* = 3.7 Hz), 127.8, 117.0 (d, *J* = 22.0 Hz), 20.4; **<sup>19</sup>F NMR** (376 MHz, CDCl<sub>3</sub>) δ -112.20; **HRMS** (ESI-TOF) *m/z*: [M+H]<sup>+</sup> Calcd for C<sub>14</sub>H<sub>12</sub>FOS<sup>+</sup>: 247.0587,

Found: 247.0584.

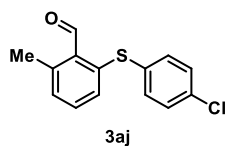

**2-((4-Chlorophenyl)thio)-6-methylbenzaldehyde (3aj):**

Purified by preparative thin-layer chromatograph using petroleum ether : ethyl acetate = 20 : 1 as the eluent to give the title compound as a pale yellow solid (35 mg, 67%); **<sup>1</sup>H NMR** (400 MHz, CDCl<sub>3</sub>) δ 10.67 (s, 1H), 7.35–7.29 (m, 4H), 7.27–7.25 (m, 1H), 7.10 (d, *J* = 7.6 Hz, 1H), 6.97 (d, *J* = 7.9 Hz, 1H), 2.64 (s, 3H); **<sup>13</sup>C NMR** (101 MHz, CDCl<sub>3</sub>) δ 192.4, 142.4, 141.6, 134.6, 134.2, 133.3, 133.0, 132.4, 130.2, 130.0, 129.0, 20.5; **HRMS** (ESI-TOF) *m/z*: [M+Na]<sup>+</sup> Calcd for C<sub>14</sub>H<sub>11</sub>ClOSNa<sup>+</sup>: 285.0111, Found: 285.0118.

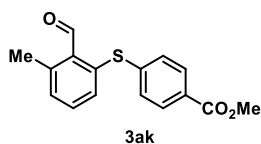

**Methyl 4-((2-formyl-3-methylphenyl)thio)benzoate (3ak):**

Purified by preparative thin-layer chromatograph using petroleum ether : ethyl acetate = 5 : 1 as the eluent to give the title compound as a pale yellow solid (37 mg, 66%); **<sup>1</sup>H NMR** (600 MHz, CDCl<sub>3</sub>) δ 10.65 (s, 1H), 7.95 (dd, *J* = 8.4, 3.1 Hz, 2H), 7.37 (td, *J* = 7.7, 3.0 Hz, 1H), 7.29–7.27 (m, 2H), 7.22 (t, *J* = 10.1 Hz, 2H), 3.90 (s, 3H), 2.64 (s, 3H); **<sup>13</sup>C NMR** (101 MHz, CDCl<sub>3</sub>) δ 193.1, 166.6, 142.4, 142.3, 138.4, 134.1, 133.4, 132.0, 131.9, 130.6, 129.7, 128.9, 52.3, 20.9; **HRMS** (ESI-TOF) *m/z*: [M+Na]<sup>+</sup> Calcd for C<sub>16</sub>H<sub>14</sub>O<sub>3</sub>SN<sup>+</sup>: 309.0556, Found: 309.0548.

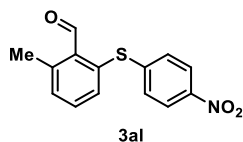

**2-Methyl-6-((4-nitrophenyl)thio)benzaldehyde (3al):**

Purified by preparative thin-layer chromatograph using petroleum ether : ethyl acetate = 20 : 1 as the eluent to give the title compound as a pale yellow oil (47 mg, 86%); **<sup>1</sup>H NMR** (600 MHz, CDCl<sub>3</sub>) δ 10.64 (s, 1H), 8.17–8.08 (m, 2H), 7.46 (t, *J* = 7.7 Hz, 1H), 7.34 (d, *J* = 8.1 Hz, 2H), 7.27 (d, *J* = 2.1 Hz, 1H), 7.26–7.25 (m, 1H), 2.65 (s, 3H); **<sup>13</sup>C NMR** (151 MHz, CDCl<sub>3</sub>) δ 193.1, 146.4, 146.3, 142.6, 135.9, 134.9, 133.8, 133.2, 133.2, 128.8, 124.5, 21.0; **HRMS** (ESI-TOF) *m/z*: [M+H]<sup>+</sup> Calcd for C<sub>14</sub>H<sub>12</sub>O<sub>3</sub>NS<sup>+</sup>: 274.0532, Found: 274.0518.

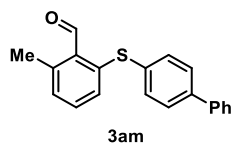

### 2-([1,1'-biphenyl]-4-ylthio)-6-methylbenzaldehyde (3am):

Purified by preparative thin-layer chromatograph using petroleum ether : ethyl acetate = 20 : 1 as the eluent to give the title compound as a pale yellow oil (29 mg, 47%); **<sup>1</sup>H NMR** (400 MHz, CDCl<sub>3</sub>) δ 10.68 (s, 1H), 7.55 (d, *J* = 8.3 Hz, 4H), 7.41 (t, *J* = 8.3 Hz, 4H), 7.32 (t, *J* = 7.3 Hz, 1H), 7.25–7.21 (m, 1H), 7.07–7.01 (m, 2H), 2.61 (s, 3H); **<sup>13</sup>C NMR** (101 MHz, CDCl<sub>3</sub>) δ 192.6, 142.2, 141.2, 140.2, 133.3, 133.2, 132.4, 130.0, 129.2, 129.0, 128.4, 127.8, 127.2, 20.6; **HRMS** (ESI-TOF) *m/z*: [M+H]<sup>+</sup> Calcd for C<sub>20</sub>H<sub>17</sub>OS<sup>+</sup>: 305.0995, Found: 305.1000.

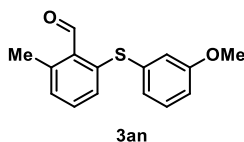

### 2-((3-Methoxyphenyl)thio)-6-methylbenzaldehyde (3an):

Purified by preparative thin-layer chromatograph using petroleum ether : ethyl acetate = 20 : 1 as the eluent to give the title compound as a pale yellow oil (31 mg, 61%); **<sup>1</sup>H NMR** (400 MHz, CDCl<sub>3</sub>) δ 10.68 (s, 1H), 7.29–7.27 (m, 1H), 7.26–7.25 (m, 1H), 7.10 (d, *J* = 7.5 Hz, 1H), 7.04 (d, *J* = 8.0 Hz, 1H), 6.96 (d, *J* = 8.0 Hz, 1H), 6.93 (s, 1H), 6.86 (dd, *J* = 8.4, 2.5 Hz, 1H), 3.78 (s, 3H), 2.64 (s, 3H); **<sup>13</sup>C NMR** (101 MHz, CDCl<sub>3</sub>) δ 192.7, 160.4, 142.2, 141.8, 133.2, 130.5, 130.2, 129.5, 124.9, 117.8, 114.1, 55.5, 20.7; **HRMS** (ESI-TOF) *m/z*: [M+H]<sup>+</sup> Calcd for C<sub>15</sub>H<sub>15</sub>O<sub>2</sub>S<sup>+</sup>: 259.0787, Found: 259.0792.

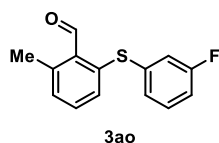

### 2-((3-Fluorophenyl)thio)-6-methylbenzaldehyde (3ao):

Purified by preparative thin-layer chromatograph using petroleum ether : ethyl acetate = 20 : 1 as the eluent to give the title compound as a pale yellow oil (22 mg, 45%); **<sup>1</sup>H NMR** (600 MHz, CDCl<sub>3</sub>) δ 10.67 (s, 1H), 7.33–7.29 (m, 2H), 7.17–7.08 (m, 3H), 7.05–6.95 (m, 2H), 2.64 (s, 3H); **<sup>13</sup>C NMR** (151 MHz, CDCl<sub>3</sub>) δ 192.8, 163.2 (d, *J* = 249.2 Hz), 142.4, 140.2, 137.3 (d, *J* = 7.7 Hz), 133.4, 133.0, 131.0, 130.9 (d, *J* = 4.1 Hz), 130.2, 127.5 (d, *J* = 2.8 Hz), 118.7 (d, *J* = 22.6 Hz), 115.0 (d, *J* = 21.5 Hz), 20.7; **<sup>19</sup>F NMR** (376 MHz, CDCl<sub>3</sub>) δ -111.3; **HRMS** (ESI-TOF) *m/z*: [M+Na]<sup>+</sup> Calcd for C<sub>14</sub>H<sub>11</sub>FOSNa<sup>+</sup>: 269.0407, Found: 269.0394.

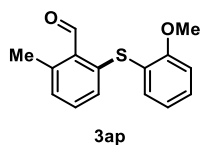

**2-((2-Methoxyphenyl)thio)-6-methylbenzaldehyde (3ap):**

Purified by preparative thin-layer chromatograph using petroleum ether : ethyl acetate = 20 : 1 as the eluent to give the title compound as a pale yellow oil (18 mg, 35%); **<sup>1</sup>H NMR** (600 MHz, CDCl<sub>3</sub>) δ 10.71 (s, 1H), 7.33 (td, *J* = 8.0, 1.7 Hz, 1H), 7.26–7.21 (m, 2H), 7.08 (d, *J* = 7.5 Hz, 1H), 6.97 (d, *J* = 7.9 Hz, 1H), 6.94–6.92 (m, 2H), 3.82 (s, 3H), 2.63 (s, 3H); **<sup>13</sup>C NMR** (151 MHz, CDCl<sub>3</sub>) δ 192.9, 158.6, 142.1, 141.4, 134.2, 133.1, 132.6, 130.0, 130.0, 129.1, 122.3, 121.6, 111.4, 56.0, 20.7; **HRMS** (ESI-TOF) *m/z*: [M+Na]<sup>+</sup> Calcd for C<sub>15</sub>H<sub>14</sub>O<sub>2</sub>SN<sup>+</sup>: 281.0607, Found: 281.0612.

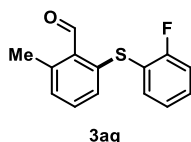

**2-((2-Fluorophenyl)thio)-6-methylbenzaldehyde (3aq):**

Purified by preparative thin-layer chromatograph using petroleum ether : ethyl acetate = 20 : 1 as the eluent to give the title compound as a pale yellow oil (25 mg, 51%); **<sup>1</sup>H NMR** (600 MHz, CDCl<sub>3</sub>) δ 10.72 (s, 1H), 7.45 – 7.39 (m, 2H), 7.28 (d, *J* = 7.5 Hz, 1H), 7.20 – 7.14 (m, 2H), 7.10 (d, *J* = 7.4 Hz, 1H), 6.92 (d, *J* = 8.1 Hz, 1H), 2.67 (s, 3H); **<sup>13</sup>C NMR** (151 MHz, CDCl<sub>3</sub>) δ 192.2, 162.3 (d, *J* = 248.7 Hz), 142.5, 140.9, 135.8, 133.3, 131.8, 131.1 (d, *J* = 7.7 Hz), 129.7, 127.8, 125.3 (d, *J* = 3.9 Hz), 120.9 (d, *J* = 18.7 Hz), 116.4 (d, *J* = 22.6 Hz), 20.4; **<sup>19</sup>F NMR** (565 MHz, CDCl<sub>3</sub>) δ -107.1; **HRMS** (ESI-TOF) *m/z*: [M+H]<sup>+</sup> Calcd for C<sub>14</sub>H<sub>12</sub>FOS<sup>+</sup>: 247.0587, Found: 247.0593.

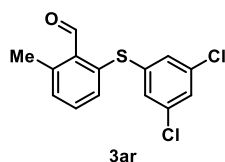

**2-((3,5-Dichlorophenyl)thio)-6-methylbenzaldehyde (3ar):**

Purified by preparative thin-layer chromatograph using petroleum ether : ethyl acetate = 20 : 1 as the eluent to give the title compound as a pale yellow solid (28 mg, 48%); **<sup>1</sup>H NMR** (400 MHz, CDCl<sub>3</sub>) δ 10.64 (s, 1H), 7.37 (t, *J* = 7.8 Hz, 1H), 7.26 (s, 1H), 7.20 (d, *J* = 7.6 Hz, 1H), 7.17 (s, 2H), 7.11 (d, *J* = 7.9 Hz, 1H), 2.65 (s, 3H); **<sup>13</sup>C NMR** (101 MHz, CDCl<sub>3</sub>) δ 192.5, 142.6, 139.0, 138.6, 135.9, 133.5, 131.6, 130.8, 129.2, 127.9, 20.6; **HRMS** (ESI-TOF) *m/z*: [M+H]<sup>+</sup> Calcd for C<sub>14</sub>H<sub>11</sub>Cl<sub>2</sub>OS<sup>+</sup>: 296.9902, Found: 296.9898.

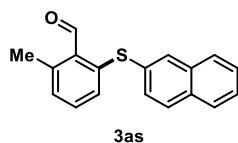

### 2-Methyl-6-(naphthalen-2-ylthio)benzaldehyde (3as):

Purified by preparative thin-layer chromatograph using petroleum ether : ethyl acetate = 20 : 1 as the eluent to give the title compound as a pale yellow solid (32 mg, 58%); **<sup>1</sup>H NMR** (600 MHz, CDCl<sub>3</sub>) δ 10.74 (s, 1H), 7.94 (s, 1H), 7.86–7.81 (m, 2H), 7.80–7.76 (m, 1H), 7.55–7.49 (m, 2H), 7.43 (dd, *J* = 8.5, 1.8 Hz, 1H), 7.23 (t, *J* = 7.8 Hz, 1H), 7.08 (d, *J* = 7.5 Hz, 1H), 7.00 (d, *J* = 8.0 Hz, 1H), 2.66 (s, 3H); **<sup>13</sup>C NMR** (151 MHz, CDCl<sub>3</sub>) δ 192.4, 142.4, 142.3, 134.0, 133.2, 132.9, 132.5, 132.2, 131.4, 130.0, 129.8, 129.4, 128.9, 127.9, 127.8, 126.9, 126.9, 20.6; **HRMS** (ESI-TOF) *m/z*: [M+Na]<sup>+</sup> Calcd for C<sub>18</sub>H<sub>14</sub>OSNa<sup>+</sup>: 301.0658, Found: 301.0658.

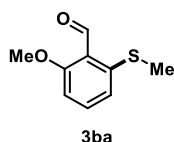

### 2-Methoxy-6-(methylthio)benzaldehyde (3ba)<sup>[4]</sup>:

Purified by preparative thin-layer chromatograph using petroleum ether : ethyl acetate = 20 : 1 as the eluent to give the title compound as a pale yellow oil (13 mg, 35%); **<sup>1</sup>H NMR** (600 MHz, CDCl<sub>3</sub>) δ 10.60 (s, 1H), 7.44 (t, *J* = 8.3 Hz, 1H), 6.86 (d, *J* = 8.2 Hz, 1H), 6.72 (d, *J* = 8.3 Hz, 1H), 3.91 (s, 3H), 2.42 (s, 3H); **<sup>13</sup>C NMR** (151 MHz, CDCl<sub>3</sub>) δ 190.1, 163.9, 145.8, 134.7, 121.3, 116.2, 106.4, 56.0, 15.5; **HRMS** (ESI-TOF) *m/z*: [M+H]<sup>+</sup> Calcd for C<sub>9</sub>H<sub>11</sub>O<sub>2</sub>S<sup>+</sup>: 183.0474, Found: 183.0473.

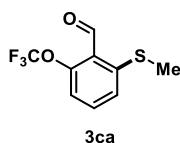

### 2-(Methylthio)-6-(trifluoromethoxy)benzaldehyde (3ca):

Purified by preparative thin-layer chromatograph using petroleum ether : ethyl acetate = 20 : 1 as the eluent to give the title compound as a pale yellow oil (28 mg, 59%); **<sup>1</sup>H NMR** (600 MHz, CDCl<sub>3</sub>) δ 10.49 (s, 1H), 7.54 (t, *J* = 8.2 Hz, 1H), 7.25 (d, *J* = 8.3 Hz, 1H), 7.09 (d, *J* = 8.2 Hz, 1H), 2.47 (s, 3H); **<sup>13</sup>C NMR** (151 MHz, CDCl<sub>3</sub>) δ 188.1, 153.0, 146.9, 134.2, 124.6, 122.7, 120.4 (q, *J* = 259.7 Hz), 115.8, 15.6; **<sup>19</sup>F NMR** (376 MHz, CDCl<sub>3</sub>) δ -57.37; **HRMS** (ESI-TOF) *m/z*: [M+H]<sup>+</sup> Calcd for C<sub>9</sub>H<sub>8</sub>F<sub>3</sub>O<sub>2</sub>S<sup>+</sup>: 237.0192, Found: 237.0181.

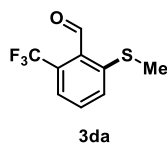

### 2-(Methylthio)-6-(trifluoromethyl)benzaldehyde (3da):

Purified by preparative thin-layer chromatograph using petroleum ether : ethyl acetate = 20 : 1 as the eluent to give the title compound as a pale yellow oil (21 mg, 48%); **<sup>1</sup>H NMR** (600 MHz, CDCl<sub>3</sub>) δ 10.48 (q, *J* = 2.4 Hz, 1H), 7.63–7.51 (m, 3H), 2.49 (s, 3H); **<sup>13</sup>C NMR** (151 MHz, CDCl<sub>3</sub>) δ 189.3 (q, *J* = 3.3 Hz), 146.2, 133.0 (q, *J* = 31.7 Hz), 129.6, 128.5, 123.6 (q, *J* = 275.1 Hz), 121.6 (q, *J* = 6.1 Hz), 16.1; **<sup>19</sup>F NMR** (376 MHz, CDCl<sub>3</sub>) δ -55.14; **HRMS** (ESI-TOF) *m/z*: [M+H]<sup>+</sup> Calcd for C<sub>9</sub>H<sub>8</sub>F<sub>3</sub>OS<sup>+</sup>: 221.0242, Found: 221.0258

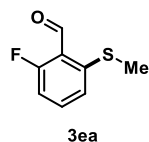

### 2-Fluoro-6-(methylthio)benzaldehyde (3ea)<sup>[5]</sup>:

Purified by preparative thin-layer chromatograph using petroleum ether : ethyl acetate = 20 : 1 as the eluent to give the title compound as a pale yellow oil (18 mg, 52%); **<sup>1</sup>H NMR** (400 MHz, CDCl<sub>3</sub>) δ 10.50 (s, 1H), 7.50 (td, *J* = 8.2, 5.9 Hz, 1H), 7.07 (d, *J* = 8.2 Hz, 1H), 6.90 (dd, *J* = 10.9, 7.8 Hz, 1H), 2.47 (s, 3H); **<sup>13</sup>C NMR** (101 MHz, CDCl<sub>3</sub>) δ 187.3 (d, *J* = 11.4 Hz), 166.8 (d, *J* = 259.3 Hz), 146.3, 135.1 (d, *J* = 11.0 Hz), 121.8, 120.0 (d, *J* = 3.3 Hz), 111.0 (d, *J* = 21.6 Hz), 15.5; **<sup>19</sup>F NMR** (376 MHz, CDCl<sub>3</sub>) δ -120.30; **HRMS** (ESI-TOF) *m/z*: [M+H]<sup>+</sup> Calcd for C<sub>8</sub>H<sub>8</sub>FOS<sup>+</sup>: 171.0274, Found: 171.0278.

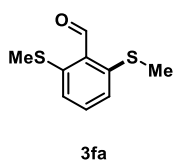

### 2,6-Bis(methylthio)benzaldehyde (3fa)<sup>[3]</sup>:

Purified by preparative thin-layer chromatograph using petroleum ether : ethyl acetate = 20 : 1 as the eluent to give the title compound as a pale yellow oil (11 mg, 27%); **<sup>1</sup>H NMR** (600 MHz, CDCl<sub>3</sub>) δ 10.71 (s, 1H), 7.42 (t, *J* = 8.0 Hz, 1H), 7.12 (d, *J* = 8.0 Hz, 2H), 2.48 (s, 6H); **<sup>13</sup>C NMR** (151 MHz, CDCl<sub>3</sub>) δ 190.2, 146.0, 133.1, 129.4, 122.1, 16.4; **HRMS** (ESI-TOF) *m/z*: [M+H]<sup>+</sup> Calcd for C<sub>9</sub>H<sub>11</sub>OS<sub>2</sub><sup>+</sup>: 199.0246, Found: 199.0239.

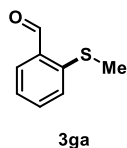

### 2-(Methylthio)benzaldehyde (3ga)<sup>[6]</sup>:

Purified by preparative thin-layer chromatograph using petroleum ether : ethyl acetate = 20 : 1 as the eluent to give the title compound as a pale yellow oil (10 mg, 30%); **<sup>1</sup>H NMR** (600 MHz, CDCl<sub>3</sub>) δ 10.23 (s, 1H), 7.77 (dd, *J* = 7.6, 1.7 Hz, 1H), 7.50 (td, *J* = 7.7, 1.6 Hz, 1H), 7.31 (d, *J* = 8.0 Hz, 1H), 7.27–7.22 (m, 1H), 2.46 (s, 3H); **<sup>13</sup>C NMR** (151 MHz, CDCl<sub>3</sub>) δ 191.4, 143.4, 134.0, 133.4, 132.8, 125.4, 124.4, 15.5; **HRMS** (ESI-TOF) *m/z*: [M+Na]<sup>+</sup> Calcd for C<sub>8</sub>H<sub>8</sub>OSNa<sup>+</sup>: 175.0188, Found: 175.0186.

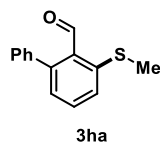

### 3-(Methylthio)-[1,1'-biphenyl]-2-carbaldehyde (3ha):

Purified by preparative thin-layer chromatograph using petroleum ether : ethyl acetate = 20 : 1 as the eluent to give the title compound as a pale yellow solid (32 mg, 71%); **<sup>1</sup>H NMR** (600 MHz, CDCl<sub>3</sub>) δ 9.95 (s, 1H), 7.54 (t, *J* = 7.8 Hz, 1H), 7.47–7.41 (m, 3H), 7.38–7.30 (m, 3H), 7.16 (d, *J* = 7.5 Hz, 1H), 2.50 (s, 3H); **<sup>13</sup>C NMR** (151 MHz, CDCl<sub>3</sub>) δ 192.5, 148.7, 144.2, 138.6, 132.6, 130.2, 130.1, 128.5, 128.3, 126.3, 123.4, 15.7; **HRMS** (ESI-TOF) *m/z*: [M+Na]<sup>+</sup> Calcd for C<sub>14</sub>H<sub>12</sub>OSNa<sup>+</sup>: 251.0501, Found: 251.0482.

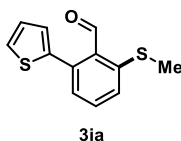

### 2-(Methylthio)-6-(thiophen-2-yl)benzaldehyde (3ia):

Purified by preparative thin-layer chromatograph using petroleum ether : ethyl acetate = 20 : 1 as the eluent to give the title compound as a pale yellow solid (21 mg, 45%); **<sup>1</sup>H NMR** (600 MHz, CDCl<sub>3</sub>) δ 10.11 (s, 1H), 7.51 (t, *J* = 7.8 Hz, 1H), 7.44 (d, *J* = 5.1 Hz, 1H), 7.33 (d, *J* = 8.2 Hz, 1H), 7.27 (d, *J* = 9.2 Hz, 1H), 7.13–7.11 (m, 1H), 7.05 (d, *J* = 2.8 Hz, 1H), 2.49 (s, 3H); **<sup>13</sup>C NMR** (151 MHz, CDCl<sub>3</sub>) δ 192.1, 144.4, 140.6, 139.3, 132.5, 130.8, 130.1, 127.7, 127.5, 126.9, 123.9, 15.7; **HRMS** (ESI-TOF) *m/z*: [M+Na]<sup>+</sup> Calcd for C<sub>12</sub>H<sub>10</sub>OS<sub>2</sub>Na<sup>+</sup>: 257.0065, Found: 226.0058.

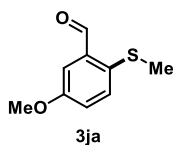

### 5-Methoxy-2-(methylthio)benzaldehyde (3ja):

Purified by preparative thin-layer chromatograph using petroleum ether : ethyl acetate = 20 : 1 as the eluent to give the title compound as a pale yellow oil (12 mg, 32%); **<sup>1</sup>H NMR** (600 MHz, CDCl<sub>3</sub>) δ 10.45 (s, 1H), 7.38 (s, 1H), 7.37 (d, *J* = 4.8 Hz, 1H), 7.12 (dd, *J* = 8.7, 2.9 Hz, 1H), 3.85 (s, 3H), 2.47 (s, 3H); **<sup>13</sup>C NMR** (151 MHz, CDCl<sub>3</sub>) δ 191.5, 158.3, 135.3, 134.1, 131.0, 122.0, 114.0, 55.8, 18.3; **HRMS** (ESI-TOF) *m/z*: [M+H]<sup>+</sup> Calcd for C<sub>9</sub>H<sub>11</sub>O<sub>2</sub>S<sup>+</sup>: 183.0474, Found: 183.0470.

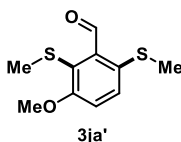

### 3-Methoxy-2,6-bis(methylthio)benzaldehyde (3ja'):

Purified by preparative thin-layer chromatograph using petroleum ether : ethyl acetate = 20 : 1 as the eluent to give the title compound as a pale yellow oil (4 mg, 8%); **<sup>1</sup>H NMR** (600 MHz, CDCl<sub>3</sub>) δ 10.81 (s, 1H), 7.28–7.26 (m, 1H), 7.10 (d, *J* = 8.9 Hz, 1H), 3.95 (s, 3H), 2.42 (s, 3H), 2.40 (s, 3H); **<sup>13</sup>C NMR** (151 MHz, CDCl<sub>3</sub>) δ 193.1, 157.3, 135.7, 134.4, 130.1, 126.4, 115.9, 56.5, 19.3, 16.4; **HRMS** (ESI-TOF) *m/z*: [M+Na]<sup>+</sup> Calcd for C<sub>10</sub>H<sub>12</sub>O<sub>2</sub>S<sub>2</sub>Na<sup>+</sup>: 251.0171, Found: 251.0157.

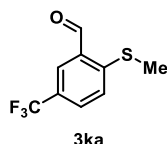

### 2-(Methylthio)-5-(trifluoromethyl)benzaldehyde (3ka)<sup>[4]</sup>:

Purified by preparative thin-layer chromatograph using petroleum ether : ethyl acetate = 20 : 1 as the eluent to give the title compound as a pale yellow oil (21 mg, 40%); **<sup>1</sup>H NMR** (400 MHz, CDCl<sub>3</sub>) δ 10.25 (s, 1H), 8.03 (s, 1H), 7.73 (dd, *J* = 8.4, 2.3 Hz, 1H), 7.43 (d, *J* = 8.4 Hz, 1H), 2.54 (s, 3H); **<sup>13</sup>C NMR** (101 MHz, CDCl<sub>3</sub>) δ 190.0, 148.5, 132.5, 130.2 (q, *J* = 4.1 Hz), 130.0 (q, *J* = 3.0 Hz), 126.8 (q, *J* = 33.3 Hz), 125.3, 123.8 (q, *J* = 272.7 Hz), 15.3; **<sup>19</sup>F NMR** (376 MHz, CDCl<sub>3</sub>) δ -62.56; **HRMS** (ESI-TOF) *m/z*: [M+Na]<sup>+</sup> Calcd for C<sub>9</sub>H<sub>8</sub>F<sub>3</sub>OSNa<sup>+</sup>: 221.0242, Found: 221.0234.



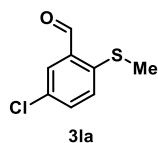

### 5-Chloro-2-(methylthio)benzaldehyde (3la)<sup>[7]</sup>:

Purified by preparative thin-layer chromatograph using petroleum ether : ethyl acetate = 20 : 1 as the eluent to give the title compound as a pale yellow oil (11 mg, 30%); **<sup>1</sup>H NMR** (400 MHz, CDCl<sub>3</sub>) δ 10.26 (s, 1H), 7.80 (d, *J* = 2.4 Hz, 1H), 7.51 (dd, *J* = 8.6, 2.5 Hz, 1H), 7.30 (d, *J* = 8.6 Hz, 1H), 2.52 (s, 3H); **<sup>13</sup>C NMR** (101 MHz, CDCl<sub>3</sub>) δ 190.0, 141.9, 134.2, 134.0, 132.2, 131.1, 127.6, 16.0; **HRMS** (ESI-TOF) *m/z*: [M+H]<sup>+</sup> Calcd for C<sub>8</sub>H<sub>8</sub>ClOS<sup>+</sup>: 186.9979, Found: 186.9977.

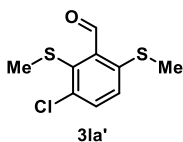

### 3-Chloro-2,6-bis(methylthio)benzaldehyde (3la'):

Purified by preparative thin-layer chromatograph using petroleum ether : ethyl acetate = 20 : 1 as the eluent to give the title compound as a pale yellow oil (7 mg, 15%); **<sup>1</sup>H NMR** (400 MHz, CDCl<sub>3</sub>) δ 10.80 (s, 1H), 7.57 (d, *J* = 8.7 Hz, 1H), 7.23 (d, *J* = 8.7 Hz, 1H), 2.43 (s, 6H); **<sup>13</sup>C NMR** (101 MHz, CDCl<sub>3</sub>) δ 192.8, 143.5, 140.4, 136.0, 135.7, 133.7, 125.8, 20.1, 15.8; **HRMS** (ESI-TOF) *m/z*: [M+Na]<sup>+</sup> Calcd for C<sub>9</sub>H<sub>10</sub>ClOS<sub>2</sub>Na<sup>+</sup>: 232.9856, Found: 232.9855.

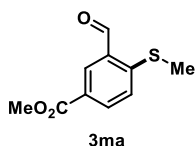

### Methyl 3-formyl-4-(methylthio)benzoate (3ma):

Purified by preparative thin-layer chromatograph using petroleum ether : ethyl acetate = 5 : 1 as the eluent to give the title compound as a white solid (17 mg, 40%); **<sup>1</sup>H NMR** (400 MHz, CDCl<sub>3</sub>) δ 10.20 (s, 1H), 8.44 (s, 1H), 8.14 (dd, *J* = 8.4, 2.0 Hz, 1H), 7.37 (d, *J* = 8.4 Hz, 1H), 3.94 (s, 3H), 2.54 (s, 3H); **<sup>13</sup>C NMR** (101 MHz, CDCl<sub>3</sub>) δ 190.9, 166.0, 149.7, 135.5, 134.1, 132.3, 126.1, 124.5, 52.5, 15.2; **HRMS** (ESI-TOF) *m/z*: [M+Na]<sup>+</sup> Calcd for C<sub>10</sub>H<sub>10</sub>O<sub>3</sub>SN<sup>+</sup>: 233.0243, Found: 233.0245.

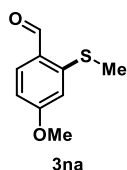

#### 4-Methoxy-2-(methylthio)benzaldehyde (3na)<sup>[4]</sup>:

Purified by preparative thin-layer chromatograph using petroleum ether : ethyl acetate = 20 : 1 as the eluent to give the title compound as a pale yellow oil (9.1 mg, 25%); <sup>1</sup>H NMR (600 MHz, CDCl<sub>3</sub>) δ 10.08 (s, 1H), 7.75 (d, *J* = 8.5 Hz, 1H), 6.79 (d, *J* = 2.3 Hz, 1H), 6.76 (dd, *J* = 8.5, 2.3 Hz, 1H), 3.90 (s, 3H), 2.47 (s, 3H); <sup>13</sup>C NMR (151 MHz, CDCl<sub>3</sub>) δ 190.0, 164.1, 146.0, 136.3, 126.8, 111.4, 109.2, 55.7, 15.4; HRMS (ESI-TOF) *m/z*: [M+Na]<sup>+</sup> Calcd for C<sub>9</sub>H<sub>10</sub>O<sub>2</sub>SNa<sup>+</sup>: 205.0294, Found: 205.0309.

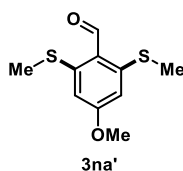

#### 4-Methoxy-2,6-bis(methylthio)benzaldehyde (3na'):

Purified by preparative thin-layer chromatograph using petroleum ether : ethyl acetate = 20 : 1 as the eluent to give the title compound as a pale yellow oil (11.4 mg, 25%); <sup>1</sup>H NMR (600 MHz, CDCl<sub>3</sub>) δ 10.57 (s, 1H), 6.59 (s, 2H), 3.90 (s, 3H), 2.46 (s, 6H); <sup>13</sup>C NMR (151 MHz, CDCl<sub>3</sub>) δ 188.5, 163.0, 148.6, 123.3, 107.6, 55.6, 16.3; HRMS (ESI-TOF) *m/z*: [M+Na]<sup>+</sup> Calcd for C<sub>10</sub>H<sub>12</sub>O<sub>2</sub>S<sub>2</sub>Na<sup>+</sup>: 251.0171, Found: 251.0175.

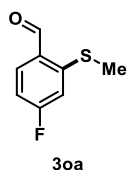

#### 4-Fluoro-2-(methylthio)benzaldehyde (3oa):

Purified by preparative thin-layer chromatograph using petroleum ether : ethyl acetate = 20 : 1 as the eluent to give the title compound as a pale yellow oil (10.5 mg, 31%); <sup>1</sup>H NMR (400 MHz, CDCl<sub>3</sub>) δ 10.13 (s, 1H), 7.79 (dd, *J* = 8.5, 6.0 Hz, 1H), 7.04–6.82 (m, 2H), 2.47 (s, 3H); <sup>13</sup>C NMR (101 MHz, CDCl<sub>3</sub>) δ 189.74, 166.17 (d, *J* = 257.5 Hz), 147.24 (d, *J* = 9.2 Hz), 136.28 (d, *J* = 10.2 Hz), 129.36, 112.24 (d, *J* = 25.4 Hz), 111.58 (d, *J* = 22.4 Hz), 15.34; <sup>19</sup>F NMR (376 MHz, CDCl<sub>3</sub>) δ -102.73; HRMS (ESI-TOF) *m/z*: [M+H]<sup>+</sup> Calcd for C<sub>8</sub>H<sub>8</sub>FOS<sup>+</sup>: 171.0274, Found: 171.0275.

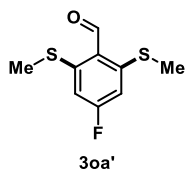

#### 4-Fluoro-2,6-bis(methylthio)benzaldehyde (3oa'):

Purified by preparative thin-layer chromatograph using petroleum ether : ethyl acetate = 20 : 1 as the eluent to give the title compound as a pale yellow oil (9 mg, 20%); **<sup>1</sup>H NMR** (600 MHz, CDCl<sub>3</sub>) δ 10.60 (s, 1H), 6.77 (d, *J* = 9.6 Hz, 2H), 2.47 (s, 6H); **<sup>13</sup>C NMR** (151 MHz, CDCl<sub>3</sub>) δ 188.3, 165.4 (d, *J* = 257.5 Hz), 149.8 (d, *J* = 9.9 Hz), 125.5, 108.6 (d, *J* = 25.3 Hz), 16.1; **<sup>19</sup>F NMR** (565 MHz, CDCl<sub>3</sub>) δ -96.58; **HRMS** (ESI-TOF) *m/z*: [M+H]<sup>+</sup> Calcd for C<sub>9</sub>H<sub>10</sub>FOS<sub>2</sub><sup>+</sup>: 217.0152, Found: 217.0138.

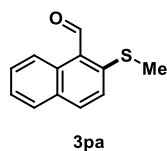

#### 2-(Methylthio)-1-naphthaldehyde (3pa)<sup>[8]</sup>:

Purified by preparative thin-layer chromatograph using petroleum ether : ethyl acetate = 20 : 1 as the eluent to give the title compound as a pale yellow oil (8.4 mg, 21%); **<sup>1</sup>H NMR** (400 MHz, CDCl<sub>3</sub>) δ 11.03 (s, 1H), 8.88 (d, *J* = 8.8 Hz, 1H), 7.98 (d, *J* = 8.8 Hz, 1H), 7.84 (d, *J* = 8.2 Hz, 1H), 7.64 (ddd, *J* = 8.5, 6.9, 1.5 Hz, 1H), 7.57–7.49 (m, 2H), 2.61 (s, 3H); **<sup>13</sup>C NMR** (101 MHz, CDCl<sub>3</sub>) 191.2, 145.8, 134.4, 132.4, 131.4, 129.4, 128.7, 126.3, 125.9, 124.3, 123.4, 17.1; **HRMS** (ESI-TOF) *m/z*: [M+H]<sup>+</sup> Calcd for C<sub>12</sub>H<sub>11</sub>OS<sup>+</sup>: 203.0525, Found: 203.0519.

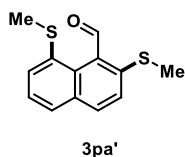

#### 2,8-Bis(methylthio)-1-naphthaldehyde (3pa'):

Purified by preparative thin-layer chromatograph using petroleum ether : ethyl acetate = 20 : 1 as the eluent to give the title compound as a pale yellow oil (10.4 mg, 21%); **<sup>1</sup>H NMR** (600 MHz, CDCl<sub>3</sub>) δ 11.00 (s, 1H), 7.85 (d, *J* = 8.7 Hz, 1H), 7.81 (dd, *J* = 7.2, 1.3 Hz, 1H), 7.78 (d, *J* = 8.1 Hz, 1H), 7.52 (d, *J* = 8.7 Hz, 1H), 7.46–7.39 (m, 1H), 2.54 (s, 3H), 2.32 (s, 3H); **<sup>13</sup>C NMR** (151 MHz, CDCl<sub>3</sub>) δ 190.3, 138.5, 135.0, 134.5, 133.8, 132.7, 132.6, 131.7, 129.1, 126.2, 125.1, 21.5, 17.3; **HRMS** (ESI-TOF) *m/z*: [M+H]<sup>+</sup> Calcd for C<sub>13</sub>H<sub>13</sub>OS<sub>2</sub><sup>+</sup>: 249.0402, Found: 249.0403.

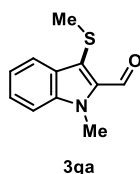

### 1-Methyl-3-(methylthio)-1*H*-indole-2-carbaldehyde (3qa)<sup>[2]</sup>:

Purified by preparative thin-layer chromatograph using petroleum ether : ethyl acetate = 10 : 1 as the eluent to give the title compound as a white solid (24 mg, 57%); **<sup>1</sup>H NMR** (400 MHz, CDCl<sub>3</sub>) δ 10.41 (s, 1H), 7.91 (d, *J* = 8.1 Hz, 1H), 7.47 (t, *J* = 7.6 Hz, 1H), 7.42–7.40 (m, 1H), 7.28–7.24 (m, 1H), 4.10 (s, 3H), 2.44 (s, 3H); **<sup>13</sup>C NMR** (101 MHz, CDCl<sub>3</sub>) δ 183.8, 139.9, 134.8, 128.5, 127.7, 122.7, 121.7, 121.5, 110.8, 31.8, 21.3; **HRMS** (ESI-TOF) *m/z*: [M+H]<sup>+</sup> Calcd for C<sub>11</sub>H<sub>12</sub>NOS<sup>+</sup>: 206.0634, Found: 206.0627.

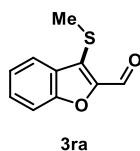

### 3-(Methylthio)benzofuran-2-carbaldehyde (3ra):

Purified by preparative thin-layer chromatograph using petroleum ether : ethyl acetate = 10 : 1 as the eluent to give the title compound as a white solid (19 mg, 49%); **<sup>1</sup>H NMR** (400 MHz, CDCl<sub>3</sub>) δ 10.15 (s, 1H), 7.85 (d, *J* = 7.9 Hz, 1H), 7.65–7.48 (m, 2H), 7.38 (t, *J* = 7.5 Hz, 1H), 2.62 (s, 3H); **<sup>13</sup>C NMR** (101 MHz, CDCl<sub>3</sub>) δ 178.8, 155.5, 150.7, 129.9, 128.6, 128.4, 124.4, 122.4, 113.2, 18.8; **HRMS** (ESI-TOF) *m/z*: [M+H]<sup>+</sup> Calcd for C<sub>10</sub>H<sub>9</sub>O<sub>2</sub>S<sup>+</sup>: 193.0318, Found: 193.0310.

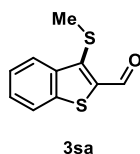

### 3-(Methylthio)benzo[*b*]thiophene-2-carbaldehyde (3sa):

Purified by preparative thin-layer chromatograph using petroleum ether : ethyl acetate = 10 : 1 as the eluent to give the title compound as a white solid (17 mg, 41%); **<sup>1</sup>H NMR** (400 MHz, CDCl<sub>3</sub>) δ 10.55 (s, 1H), 8.16 (dd, *J* = 7.8, 2.4 Hz, 1H), 7.88 (d, *J* = 7.1 Hz, 1H), 7.52 (pd, *J* = 7.1, 1.5 Hz, 2H), 2.52 (s, 3H); **<sup>13</sup>C NMR** (101 MHz, CDCl<sub>3</sub>) δ 185.6, 144.0, 141.7, 140.3, 139.4, 128.8, 125.6, 124.9, 123.7, 20.6; **HRMS** (ESI-TOF) *m/z*: [M+H]<sup>+</sup> Calcd for C<sub>10</sub>H<sub>9</sub>OS<sub>2</sub><sup>+</sup>: 209.0089, Found: 209.0089.

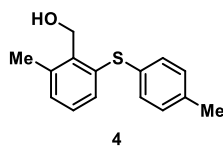

#### (2-Methyl-6-(*p*-tolylthio)phenyl)methanol (4):

Purified by preparative thin-layer chromatograph using petroleum ether : ethyl acetate = 10 : 1 as the eluent to give the title compound as a colourless oil (87 mg, 89%); **<sup>1</sup>H NMR** (400 MHz, CDCl<sub>3</sub>) δ 7.23–7.03 (m, 7H), 4.89 (s, 2H), 2.48 (s, 3H), 2.33 (s, 3H), 1.99 (s, 1H); **<sup>13</sup>C NMR** (101 MHz, CDCl<sub>3</sub>) δ 139.5, 138.9, 137.0, 135.7, 132.8, 131.2, 130.6, 130.4, 130.2, 128.7, 60.3, 21.1, 19.8; **HRMS** (ESI-TOF) m/z: [M+Na]<sup>+</sup> Calcd for C<sub>15</sub>H<sub>16</sub>OSNa<sup>+</sup>: 267.0814, Found: 267.0817.

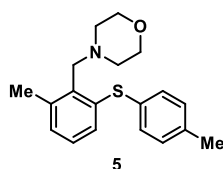

#### 4-(2-Methyl-6-(*p*-tolylthio)benzyl)morpholine (5):

Purified by preparative thin-layer chromatograph using petroleum ether : ethyl acetate = 10 : 1 as the eluent to give the title compound as a colourless oil (60 mg, 48%); **<sup>1</sup>H NMR** (400 MHz, CDCl<sub>3</sub>) δ 7.22 (d, *J* = 8.1 Hz, 2H), 7.11 (d, *J* = 7.9 Hz, 2H), 7.06–6.85 (m, 3H), 3.72 (brs, 2H), 3.65 (brs, 4H), 2.51 (brs, 4H), 2.44 (s, 3H), 2.33 (s, 3H); **<sup>13</sup>C NMR** (101 MHz, CDCl<sub>3</sub>) δ 139.1, 138.8, 137.2, 131.9, 130.1, 129.5, 128.9, 127.7, 126.1, 67.3, 57.1, 53.1, 21.2, 20.5; **HRMS** (ESI-TOF) m/z: [M+H]<sup>+</sup> Calcd for C<sub>29</sub>H<sub>24</sub>NOS<sup>+</sup>: 314.1573, Found: 314.1573.

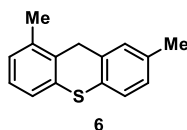

#### 1,7-Dimethyl-9H-thioxanthene (6):

Purified by preparative thin-layer chromatograph using petroleum ether : ethyl acetate = 50 : 1 as the eluent to give the title compound as a colourless oil (56 mg, 62%); **<sup>1</sup>H NMR** (400 MHz, CDCl<sub>3</sub>) δ 7.40–7.35 (m, 2H), 7.23 (s, 1H), 7.17–7.10 (m, 2H), 7.07 (d, *J* = 7.8 Hz, 1H), 3.88 (s, 2H), 2.53 (s, 3H), 2.41 (s, 3H); **<sup>13</sup>C NMR** (101 MHz, CDCl<sub>3</sub>) δ 136.4, 136.4, 135.4, 135.0, 134.4, 131.0, 128.9, 128.4, 127.4, 126.6, 125.9, 125.0, 35.1, 21.1, 20.2; **HRMS** (ESI-TOF) m/z: [M+H]<sup>+</sup> Calcd for C<sub>15</sub>H<sub>15</sub>S<sup>+</sup>: 227.0889, Found: 227.0881.

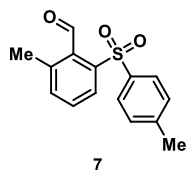

### 2-Methyl-6-tosylbenzaldehyde (7)<sup>[1]</sup>:

Purified by preparative thin-layer chromatograph using petroleum ether : ethyl acetate = 5 : 1 as the eluent to give the title compound as a white solid (76 mg, 69%); **<sup>1</sup>H NMR** (400 MHz, CDCl<sub>3</sub>) δ 10.79 (s, 1H), 7.96 (d, *J* = 7.7 Hz, 1H), 7.74 (d, *J* = 8.4 Hz, 2H), 7.52 (t, *J* = 7.7 Hz, 1H), 7.47 (d, *J* = 7.2 Hz, 1H), 7.31 (d, *J* = 8.4 Hz, 2H), 2.43 (s, 3H), 2.39 (s, 3H); **<sup>13</sup>C NMR** (101 MHz, CDCl<sub>3</sub>) δ 193.5, 144.9, 142.2, 139.7, 138.7, 136.9, 134.8, 131.3, 130.2, 127.8, 127.3, 21.7, 20.7; **HRMS** (ESI-TOF) *m/z*: [M+Na]<sup>+</sup> Calcd for C<sub>15</sub>H<sub>14</sub>O<sub>3</sub>SN<sup>+</sup>: 297.0556, Found: 297.0554.

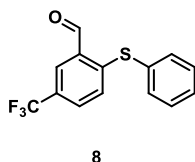

### 2-(Phenylthio)-5-(trifluoromethyl)benzaldehyde (8)<sup>[9]</sup>:

Purified by preparative thin-layer chromatograph using petroleum ether : ethyl acetate = 10 : 1 as the eluent to give the title compound as a yellow oil (141 mg, 50%); **<sup>1</sup>H NMR** (400 MHz, CDCl<sub>3</sub>) δ 10.32 (s, 1H), 8.06 (d, *J* = 2.1 Hz, 1H), 7.59–7.49 (m, 3H), 7.49–7.39 (m, 3H), 7.01 (s, 1H); **<sup>13</sup>C NMR** (101 MHz, CDCl<sub>3</sub>) δ 189.9, 147.9, 134.9, 132.5, 130.7, 130.2, 129.89 (q, *J* = 4.0 Hz), 129.8, 129.4 (q, *J* = 3.0 Hz), 128.7, 127.7 (q, *J* = 33.3 Hz), 123.6 (q, *J* = 273.7 Hz); **<sup>19</sup>F NMR** (376 MHz, CDCl<sub>3</sub>) δ -62.7. **HRMS** (ESI-TOF) *m/z*: [M+Na]<sup>+</sup> Calcd for C<sub>14</sub>H<sub>9</sub>F<sub>3</sub>OSNa<sup>+</sup>: 305.0218, Found: 302.0217.

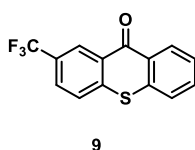

### 2-(Trifluoromethyl)-9H-thioxanthen-9-one (9)<sup>[9]</sup>:

Purified by preparative thin-layer chromatograph using petroleum ether : ethyl acetate = 10 : 1 as the eluent to give the title compound as a yellow oil (96 mg, 69%); **<sup>1</sup>H NMR** (400 MHz, CDCl<sub>3</sub>) δ 8.89 (s, 1H), 8.63 (dd, *J* = 8.1, 1.5 Hz, 1H), 7.82 (dd, *J* = 8.5, 2.1 Hz, 1H), 7.74–7.63 (m, 2H), 7.61–7.58 (m, 1H), 7.56–7.52 (m, 1H); **<sup>13</sup>C NMR** (101 MHz, CDCl<sub>3</sub>) δ 179.1, 141.2, 136.6, 133.0, 130.2, 129.3, 129.1, 128.7, 128.3 (q, *J* = 4.0 Hz), 127.4 (q, *J* = 4.1 Hz), 127.1, 127.0, 126.2, 123.8 (q, *J* = 272.7 Hz); **<sup>19</sup>F NMR** (376 MHz, CDCl<sub>3</sub>) δ -62.6. **HRMS** (ESI-TOF) *m/z*: [M+H]<sup>+</sup> Calcd for C<sub>14</sub>H<sub>8</sub>F<sub>3</sub>OS<sup>+</sup>: 281.0242, Found: 281.0239.

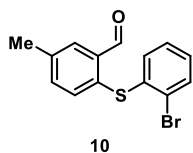

**2-((2-Bromophenyl)thio)-5-methylbenzaldehyde (10)<sup>[9]</sup>:**

Purified by preparative thin-layer chromatograph using petroleum ether : ethyl acetate = 10 : 1 as the eluent to give the title compound as a yellow oil (187 mg, 61%); **<sup>1</sup>H NMR** (400 MHz, CDCl<sub>3</sub>) δ 10.40 (s, 1H), 7.79 (d, *J* = 2.0 Hz, 1H), 7.60 (dd, *J* = 7.8, 1.4 Hz, 1H), 7.38–7.34 (m, 1H), 7.23–7.16 (m, 2H), 7.09 (td, *J* = 7.6, 1.7 Hz, 1H), 6.98 (dd, *J* = 7.8, 1.7 Hz, 1H), 2.42 (s, 3H); **<sup>13</sup>C NMR** (101 MHz, CDCl<sub>3</sub>) δ 191.9, 139.0, 137.4, 135.7, 135.6, 134.4, 134.0, 133.5, 131.5, 131.2, 128.4, 128.3, 124.6, 21.1. **HRMS** (ESI-TOF) *m/z*: [M+Na]<sup>+</sup> Calcd for C<sub>14</sub>H<sub>11</sub>BrOSNa<sup>+</sup>: 328.9606, Found: 328.9607.

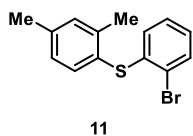

**(2-Bromophenyl)(2,4-dimethylphenyl)sulfane (11)<sup>[9]</sup>:**

Purified by preparative thin-layer chromatograph using petroleum ether : ethyl acetate = 50 : 1 as the eluent to give the title compound as a light yellow oil (156 mg, 88%); **<sup>1</sup>H NMR** (400 MHz, CDCl<sub>3</sub>) δ 7.53 (dd, *J* = 7.9, 1.4 Hz, 1H), 7.40 (d, *J* = 7.8 Hz, 1H), 7.17 (s, 1H), 7.11–7.02 (m, 2H), 6.96 (td, *J* = 7.6, 1.6 Hz, 1H), 6.57 (dd, *J* = 7.9, 1.6 Hz, 1H), 2.37 (s, 3H), 2.34 (s, 3H); **<sup>13</sup>C NMR** (101 MHz, CDCl<sub>3</sub>) δ 142.5, 140.1, 139.7, 136.3, 133.0, 132.1, 128.2, 127.8, 127.5, 127.3, 126.2, 121.4, 21.4, 20.7. **HRMS** (ESI-TOF) *m/z*: [M+H]<sup>+</sup> Calcd for C<sub>15</sub>H<sub>15</sub>O<sub>3</sub>S<sup>+</sup>: 292.9994, Found: 292.9994.

## 8. References.

- [1]. a) E. Carbonnel, T. Besset, T. Poisson, D. Labar, X. Pannecoucke and P. Jubault, *Chem. Commun.*, 2017, **53**, 5706–5709; b) J. Zhu, Y. Ye, Y. Yan, J. Sun and Y. Huang, *Org. Lett.*, 2023, **25**, 5324–5328.
- [2]. B. Bieszczad and M. Barbasiewicz, *Chem. Eur. J.*, 2015, **21**, 10322–10325.
- [3]. F. Feist, J. P. Menzel, T. Weil, J. P. Blinco and C. Barner-Kowollik, *J. Am. Chem. Soc.*, 2018, **140**, 11848–11854.
- [4]. J. Massouh, A. Petrelli, V. Bellière-Baca, D. Hérault and H. Clavier, *Adv. Synth. Catal.*, 2022, **364**, 831–837.
- [5]. M. Arambasic, M. K. Majhail, R. N. Straker, J. D. Neuhaus and M. C. Willis, *Chem. Commun.*, 2019, **55**, 2757–2760.
- [6]. T. Delcaillau, A. Bismuto, Z. Lian and B. Morandi, *Angew. Chem. Int. Ed.*, 2020, **59**, 2110–2114.
- [7]. N. Mast, W. Erb, L. Nauton, P. Moreau, O. Mongin, T. Roisnel, M. Macaigne, T. Robert, S. Bach, L. Picot, V. Thiéry, J.-P. Hurvois and F. Mongin, *New J. Chem.*, 2023, **47**, 258–283.
- [8]. T. Yamamoto, S. Shinamura, E. Miyazaki and K. Takimiya, *Bull. Chem. Soc. Jpn.*, 2010, **83**, 120–130.
- [9]. J.-D. Guo, Y.-J. Chen, C.-H. Wang, Q. He, X.-L. Yang, T.-Y. Ding, K. Zhang, R.-N. Ci, B. Chen, C.-H. Tung and L.-Z. Wu, *Angew. Chem. Int. Ed.*, 2023, **62**, e202214944.



## 9. $^1\text{H}$ NMR, $^{13}\text{C}$ NMR and $^{19}\text{F}$ NMR spectra.

MMS-02-176. 10. fid  
PROTON CDC13 {D:\Bruker\TOPSPIN\data\data\1hq} 1hq 37

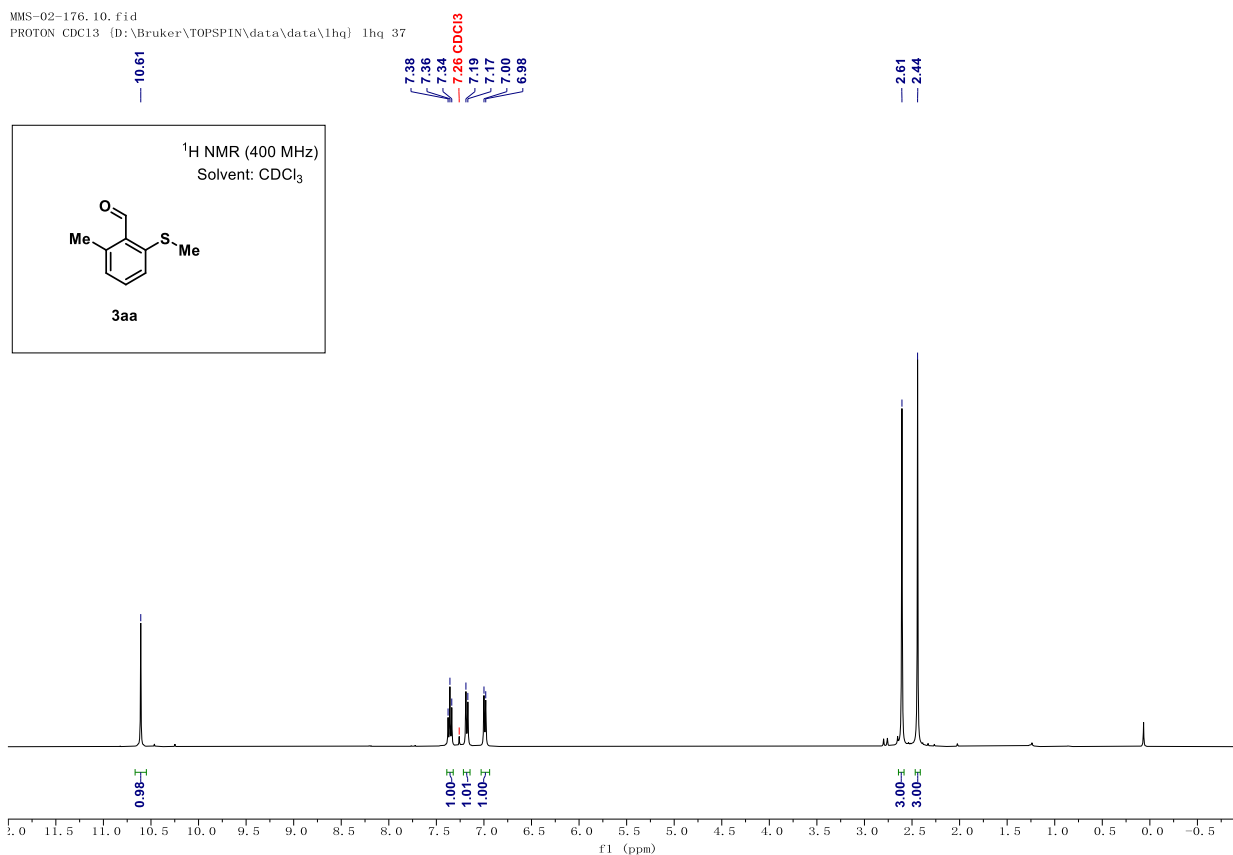

MMS-02-176. 11. fid  
C13CPD CDC13 {D:\Bruker\TOPSPIN\data\data\1hq} 1hq 37

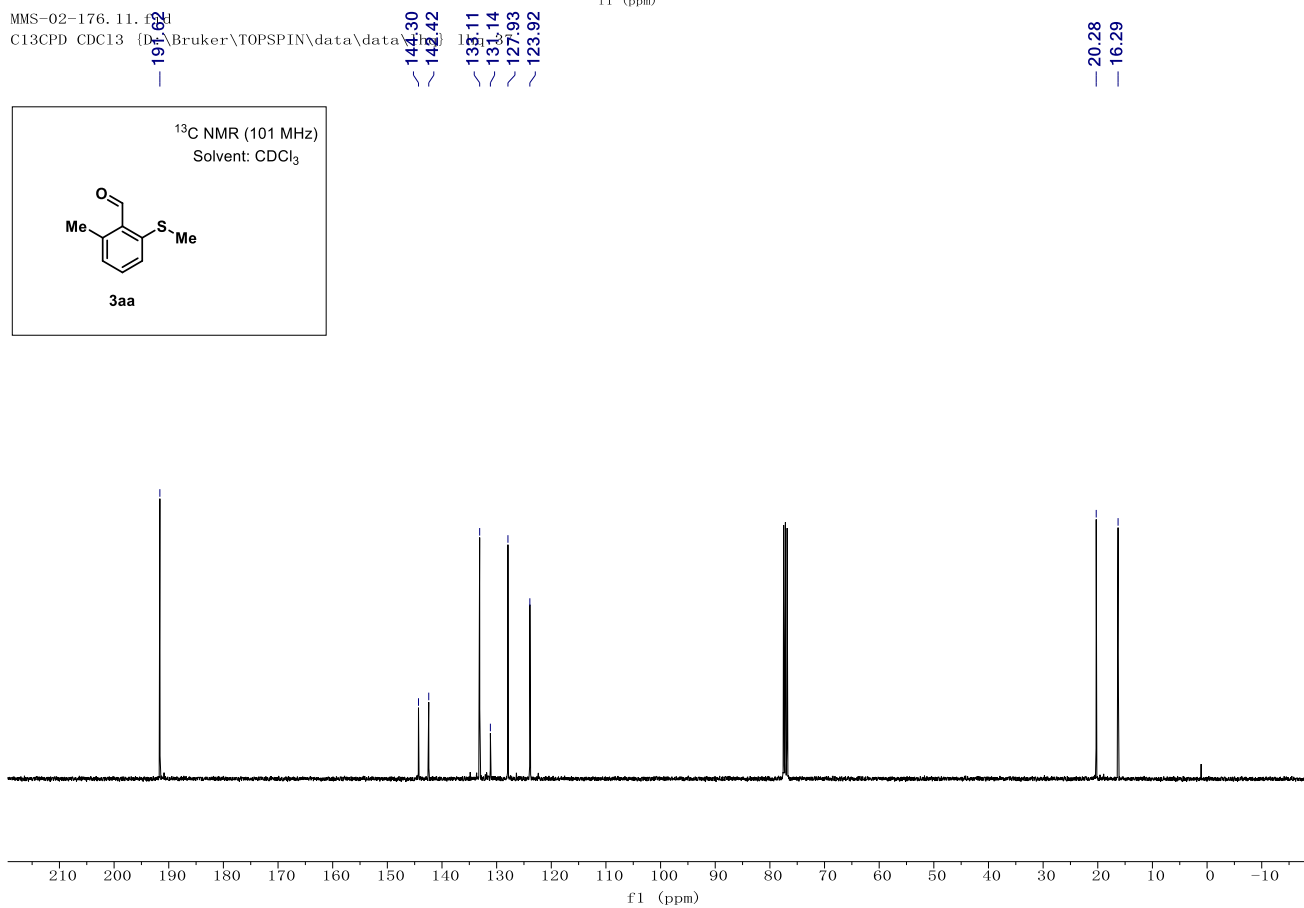

H-mms-03-78-3. 10. fid

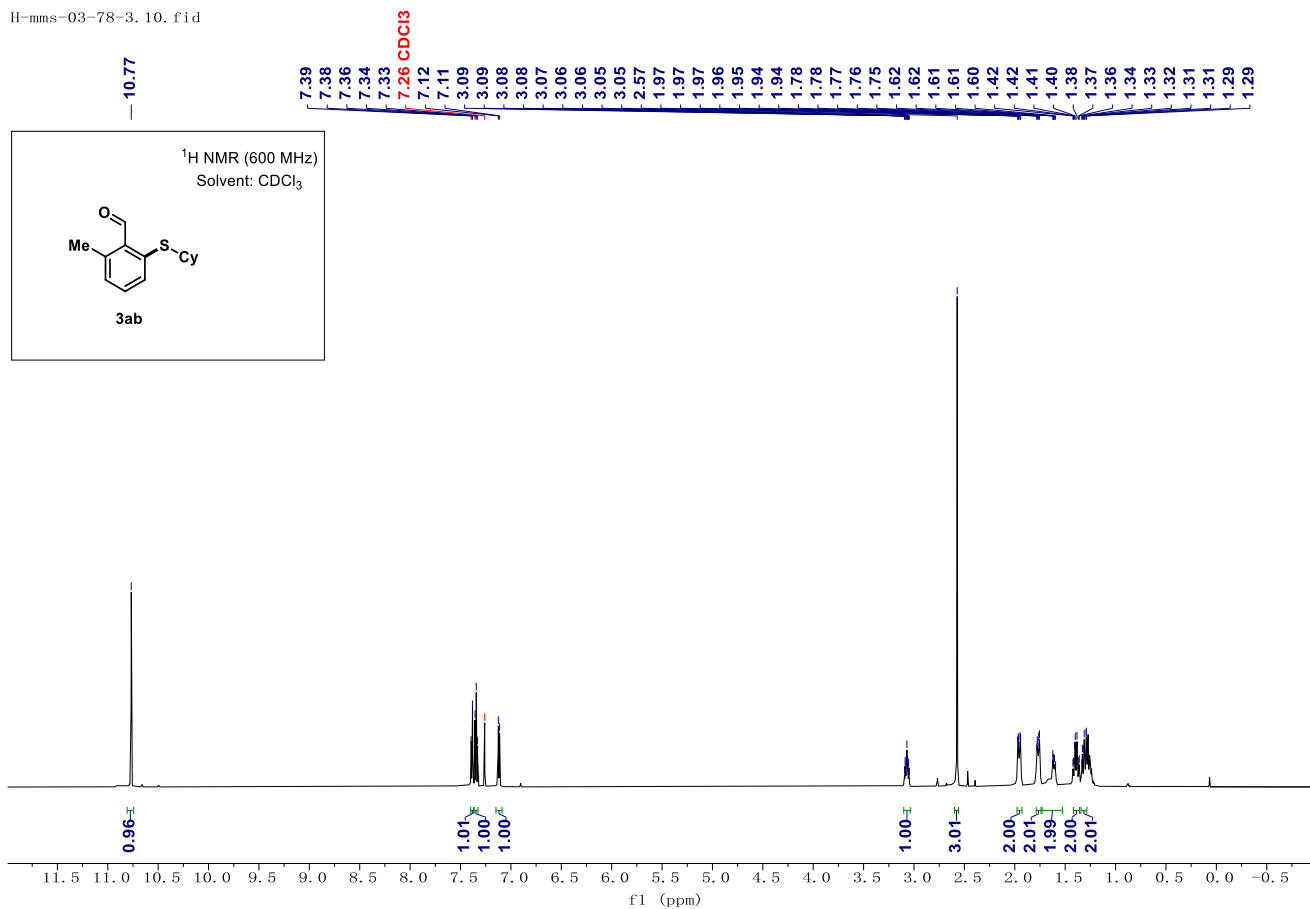

03-78-3. 11. fid

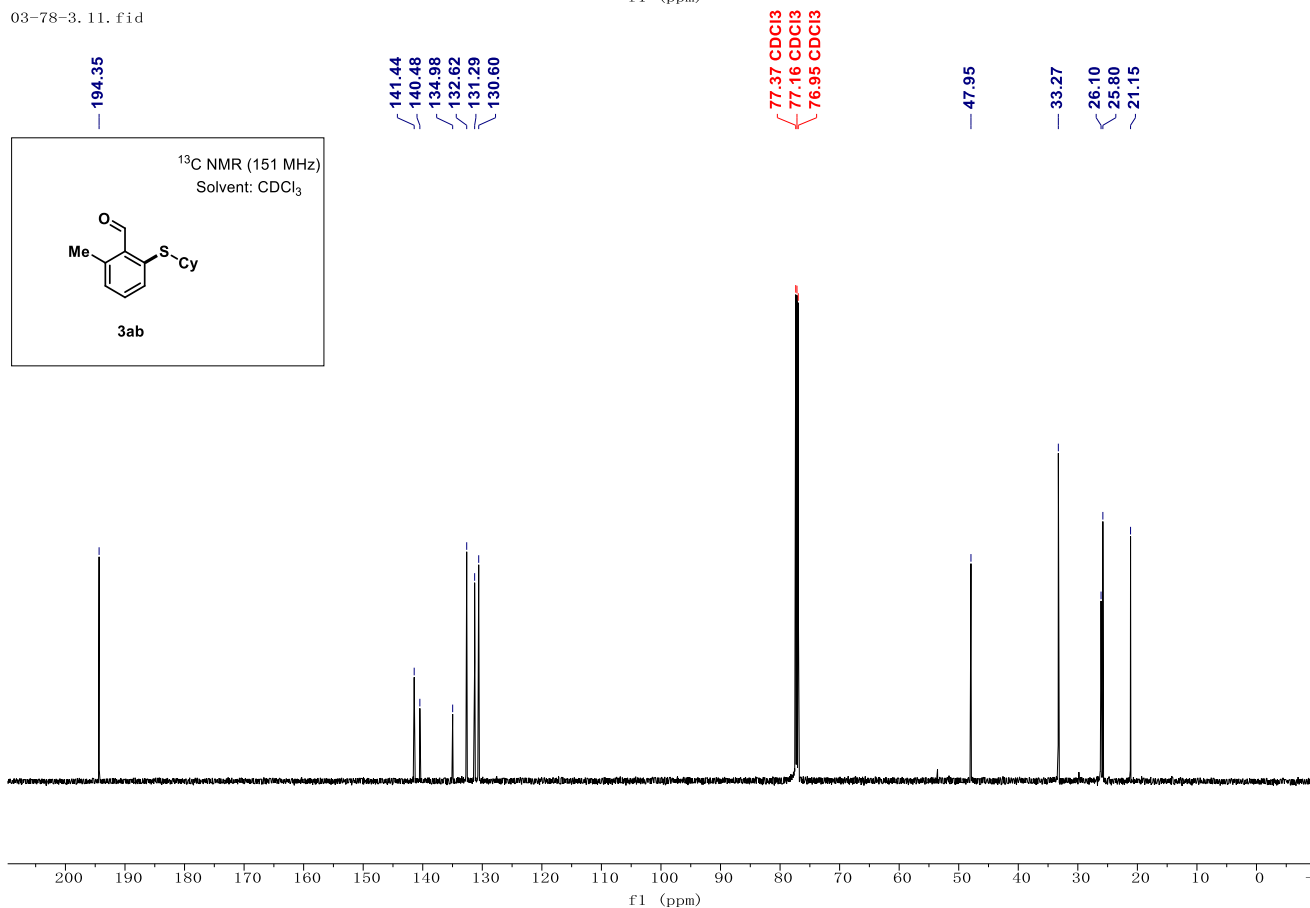

mms-03-66-4a.10.fid

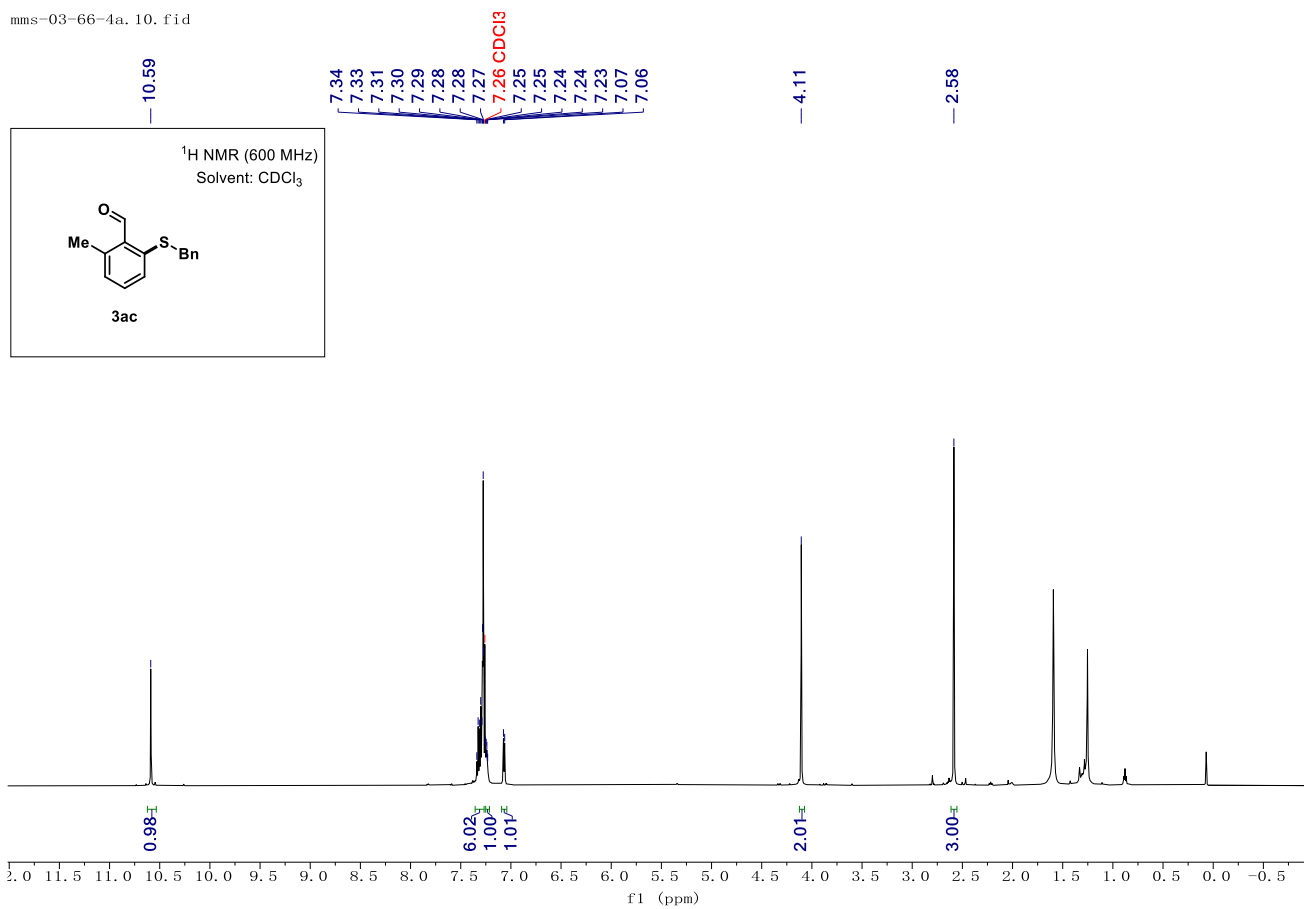

c-mms-03-66-4a.10.fid

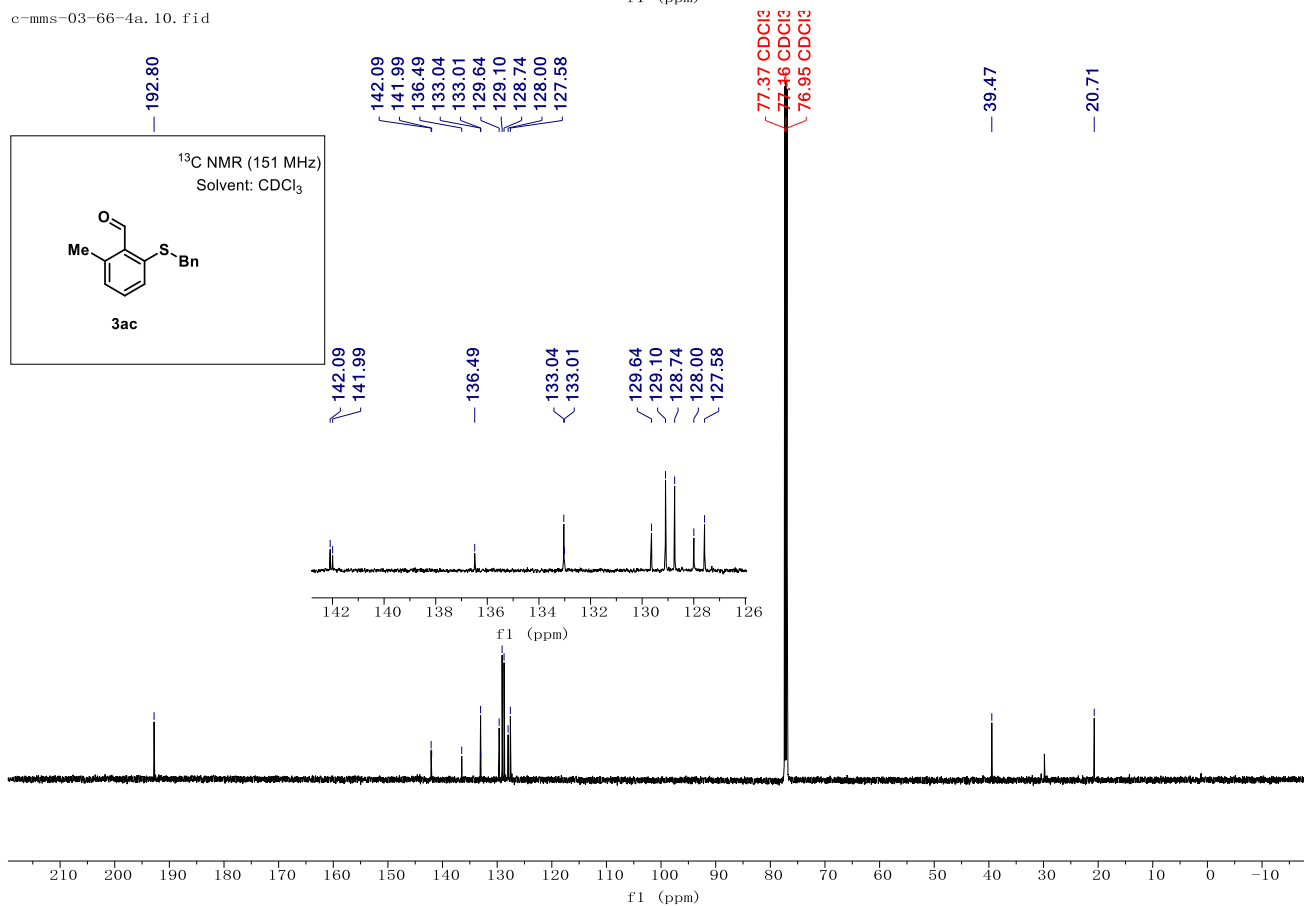

MMS-03-8-3.10.fid

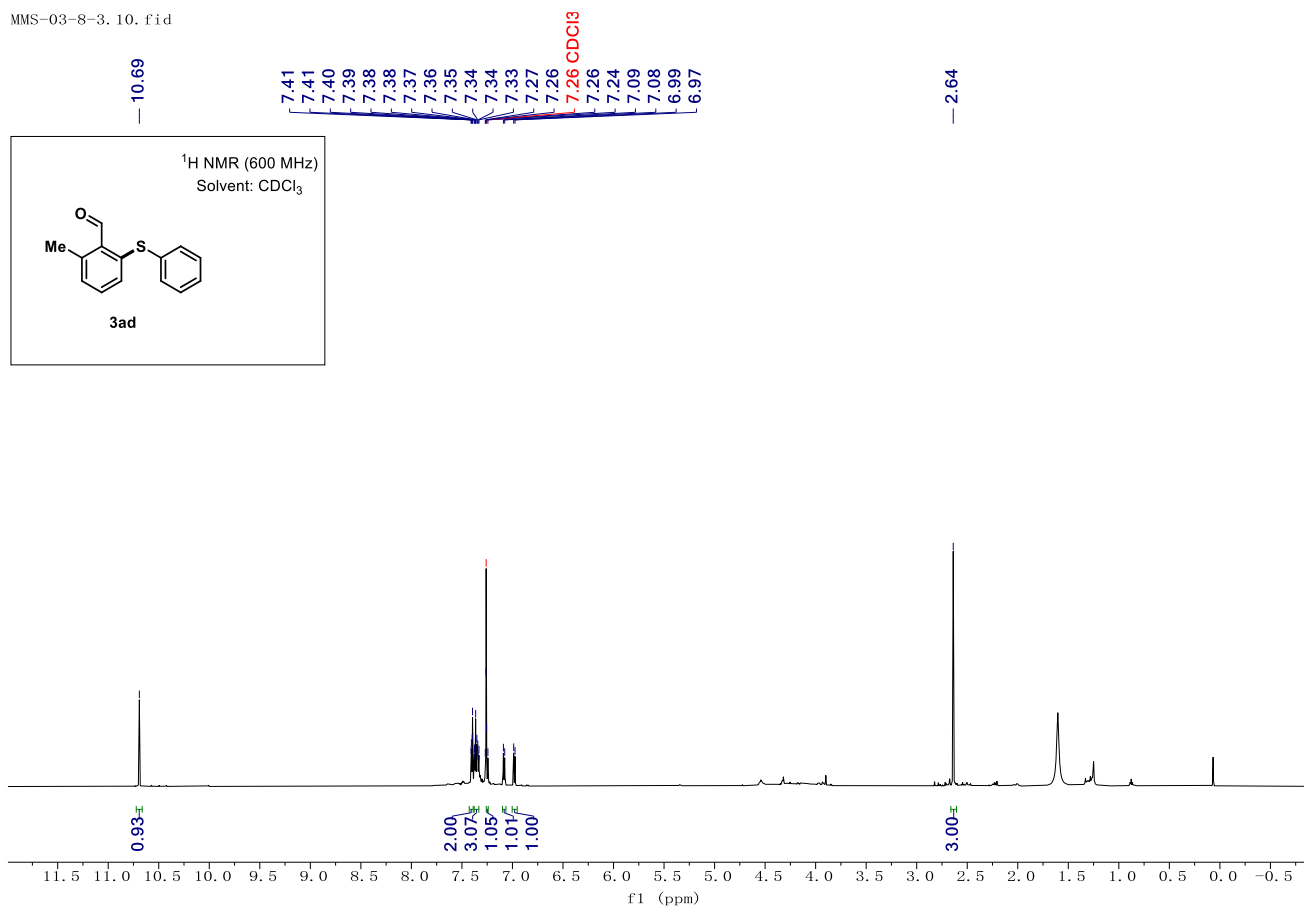

C-MMS-03-8-3.10.fid

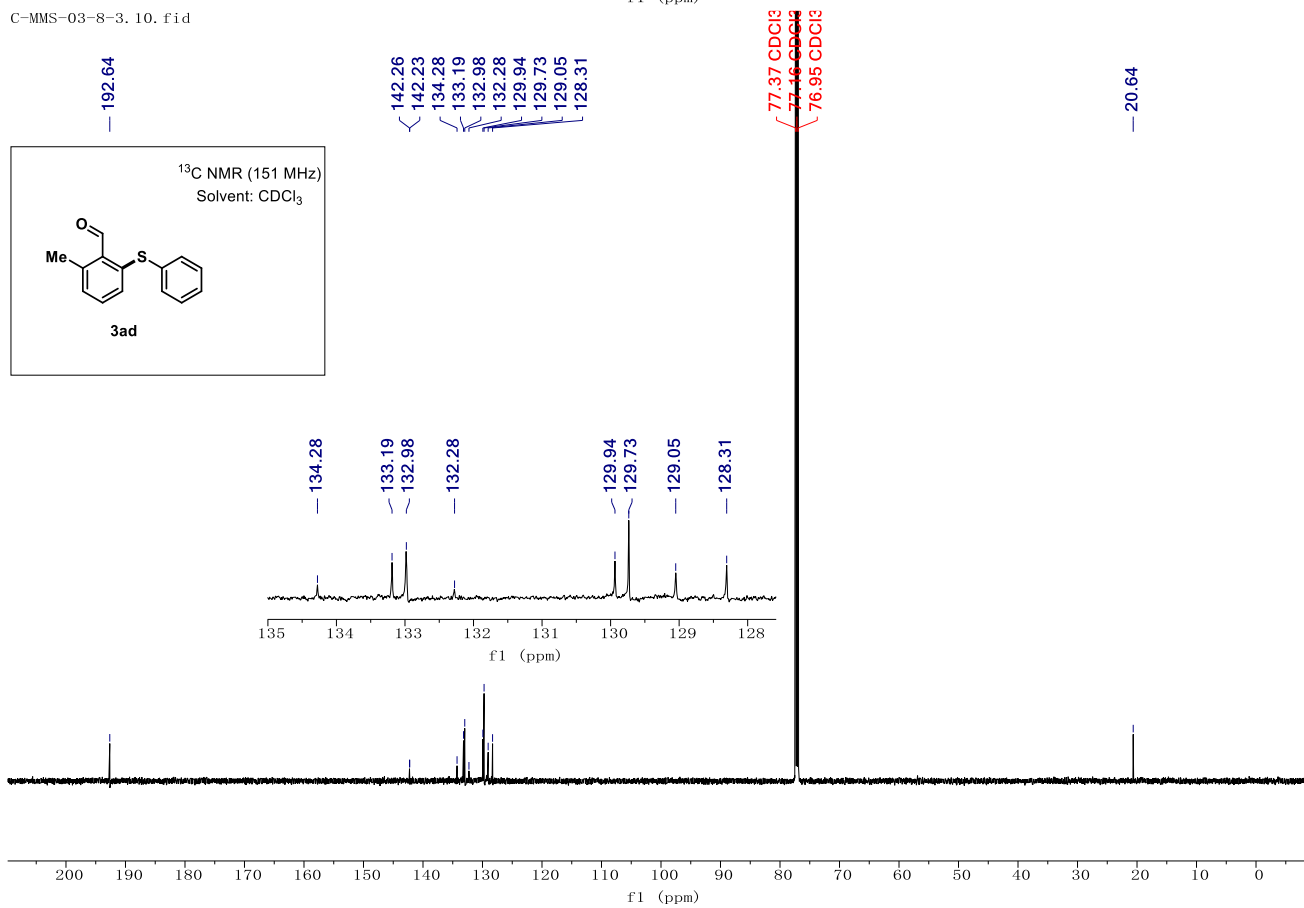

MMS-03-64-3A. 20. fid

PROTON CDC13 {D:\Bruker\TOPSPIN\data\data\lhq\lhq 31

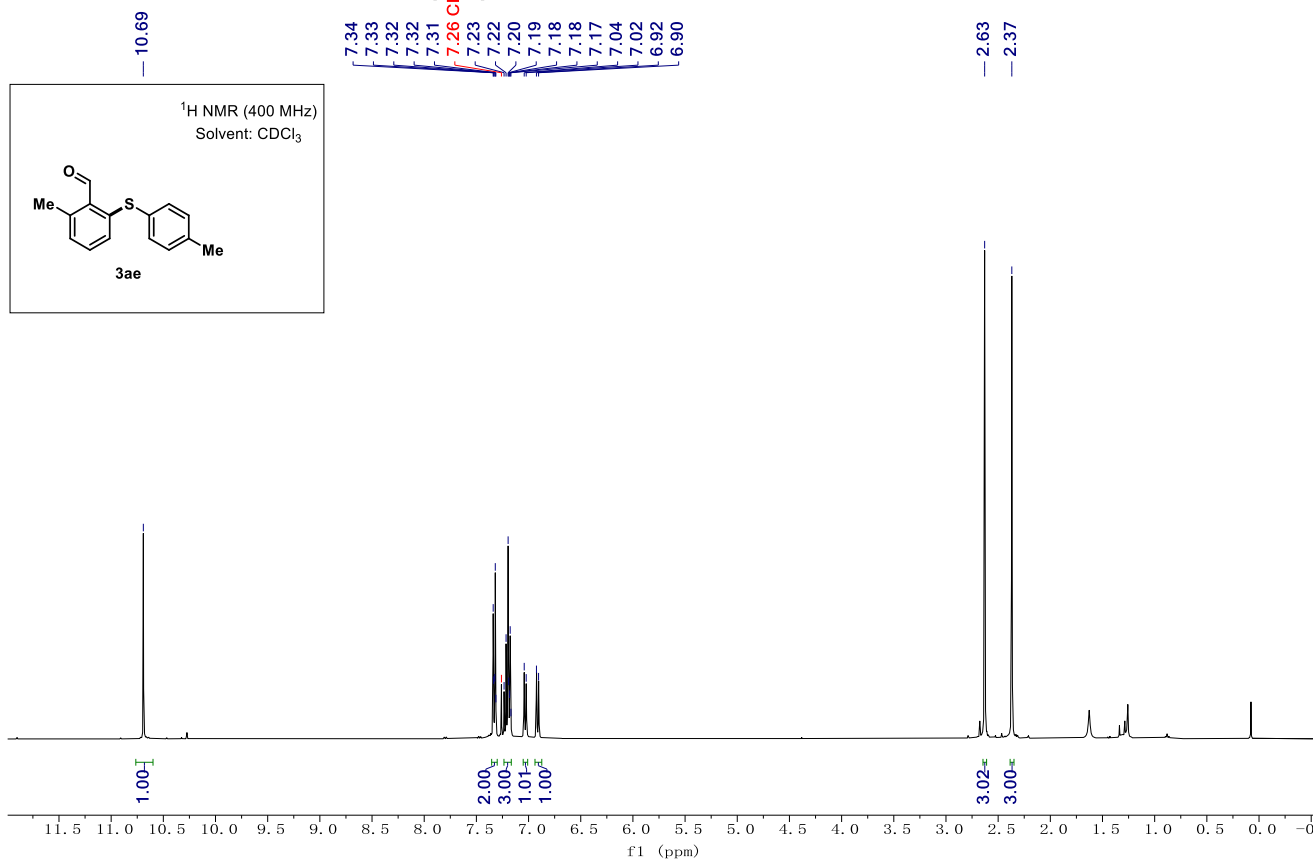

c-mms-03-64-3. 10. fid

C13CPD CDC13 {D:\Bruker\TOPSPIN\data\data\lhq\lhq 53

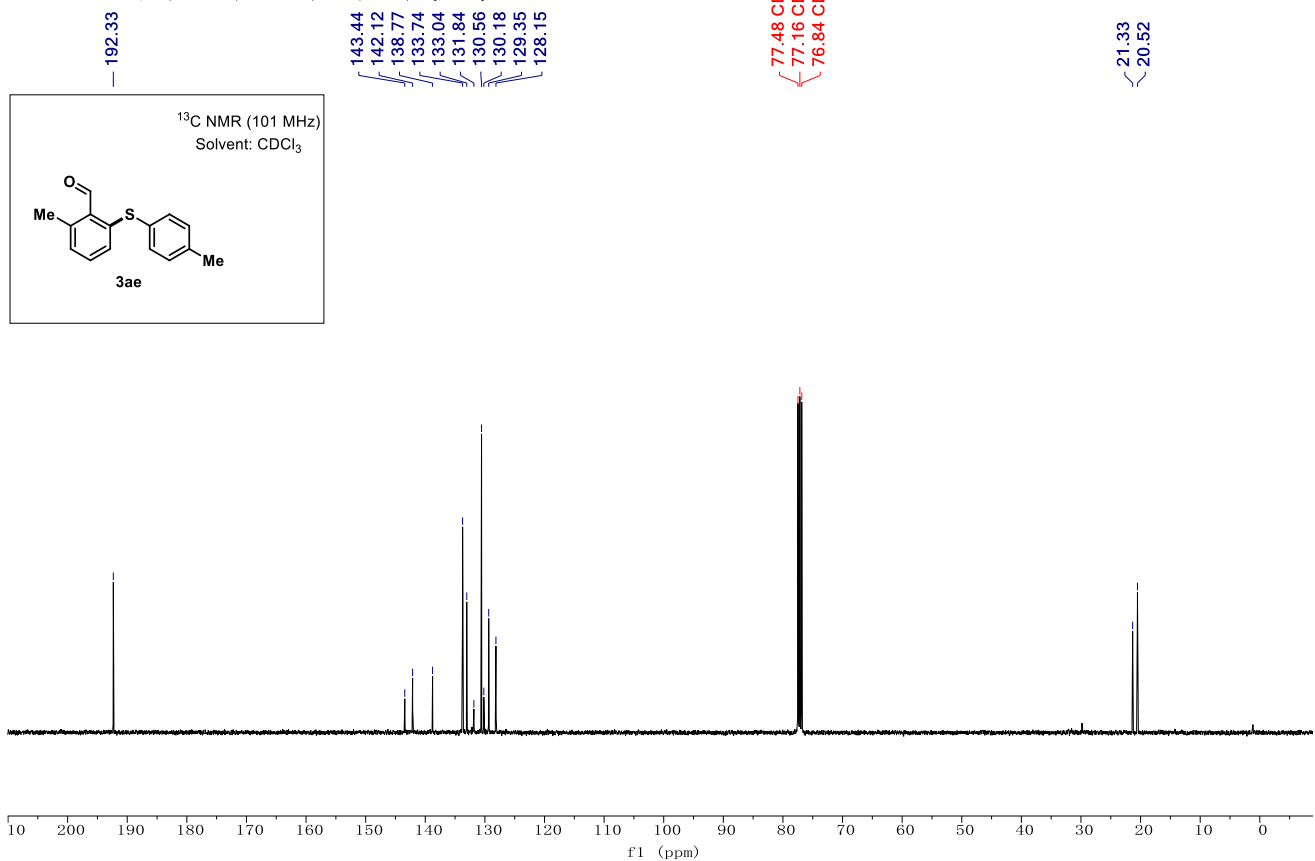

mms-03-72-1.10.fid

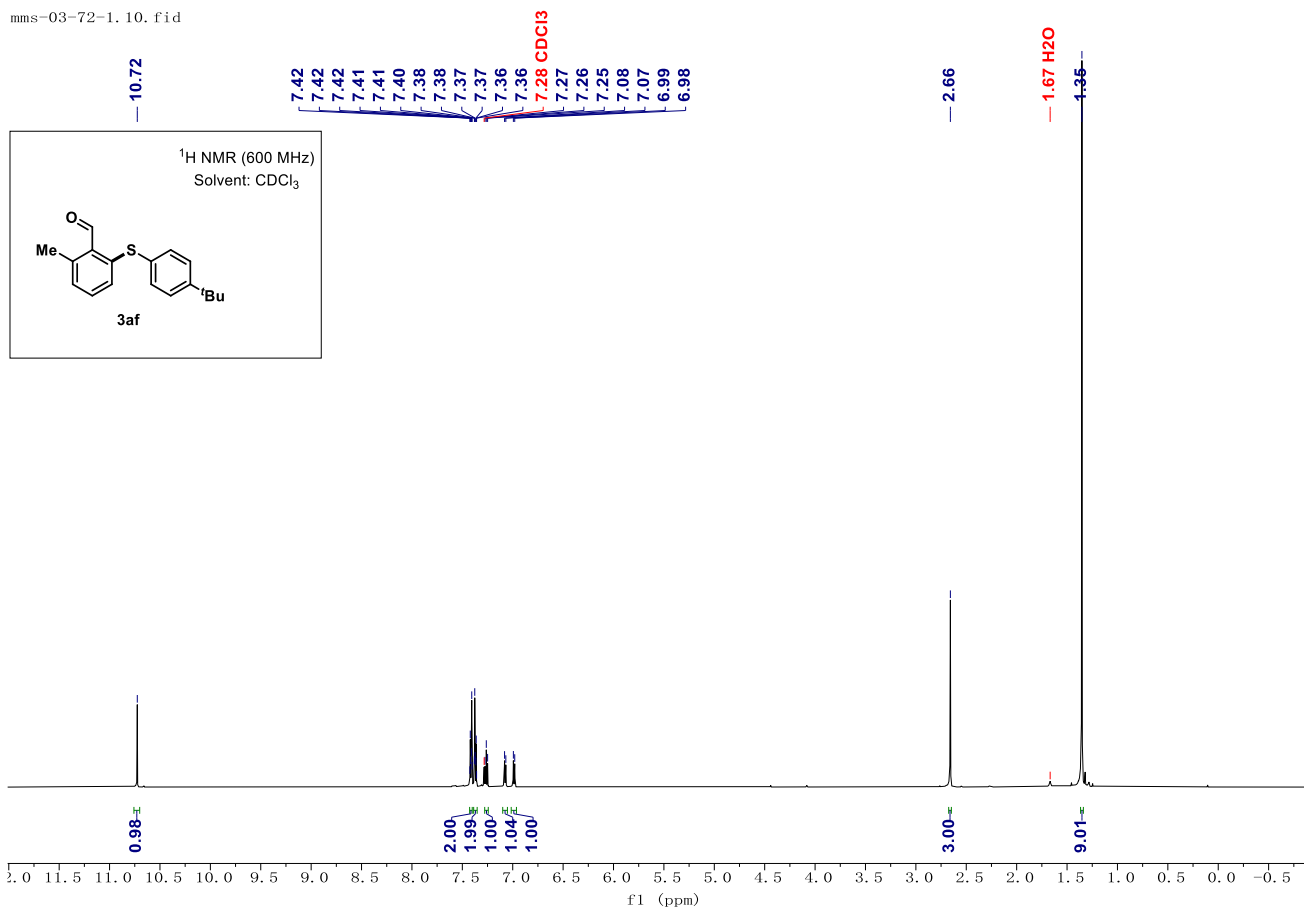

mms-03-72-1.11.fid

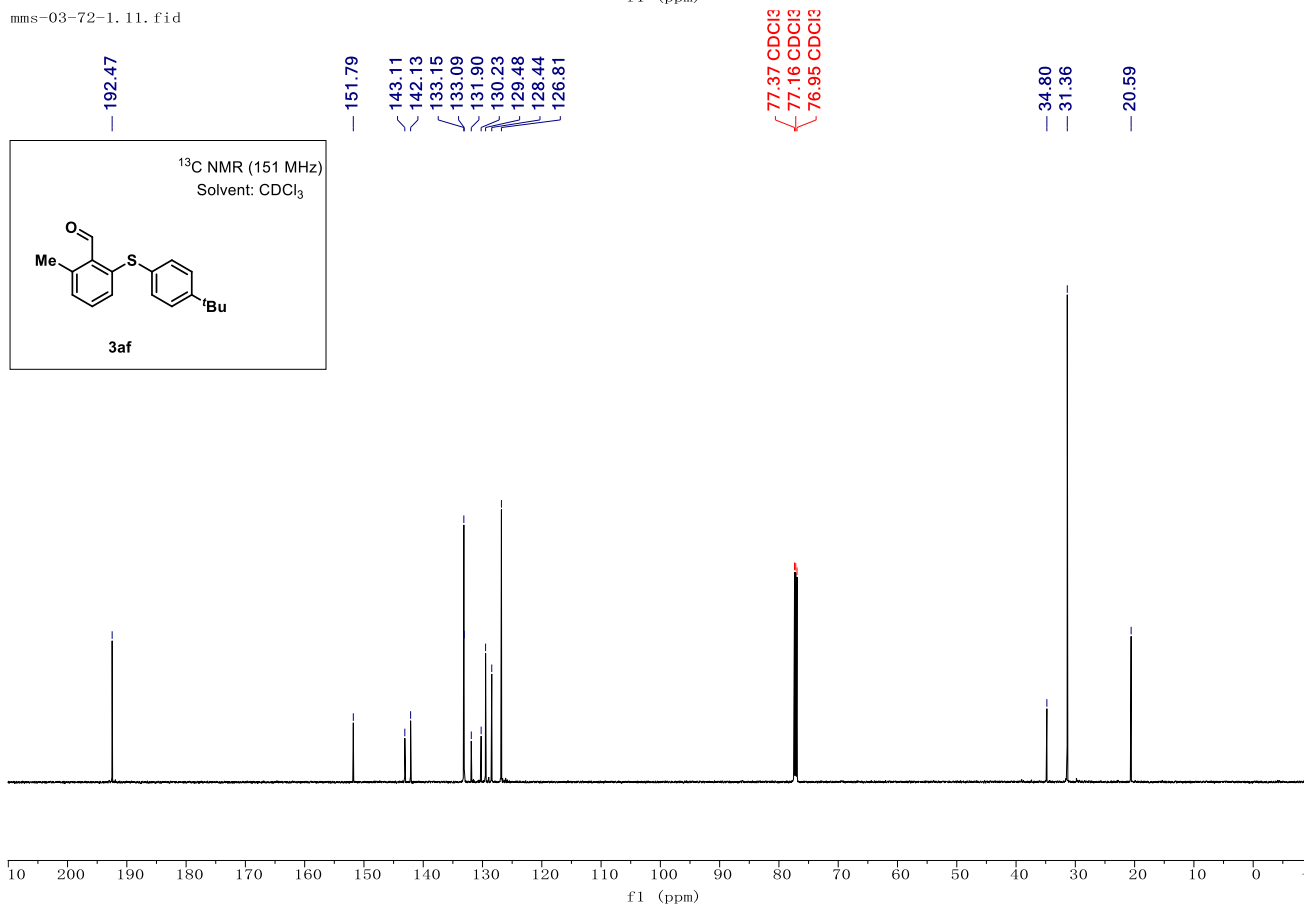

MMS-03-64-4. 10. fid

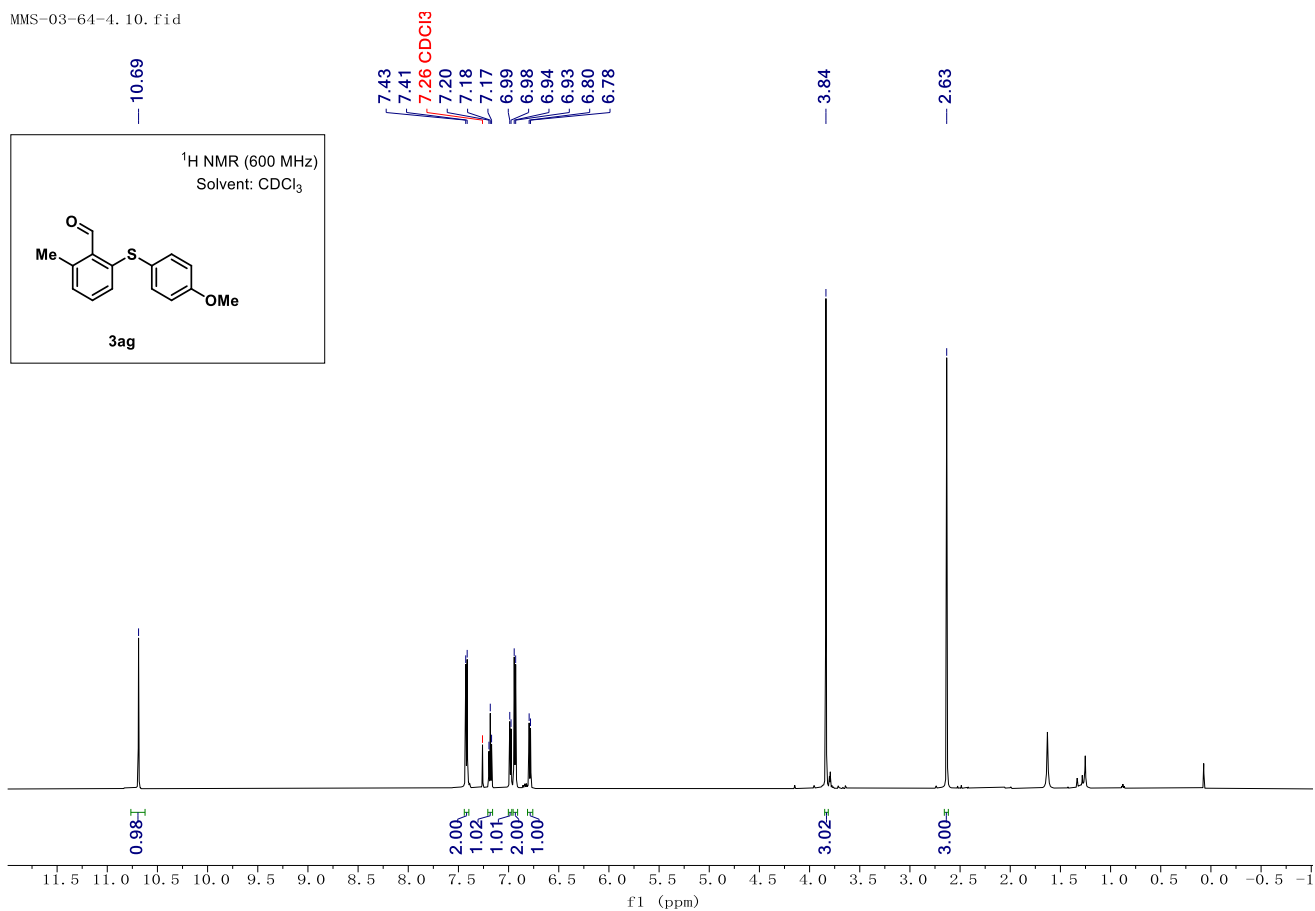

C-MMS-03-64-4. 10. fid

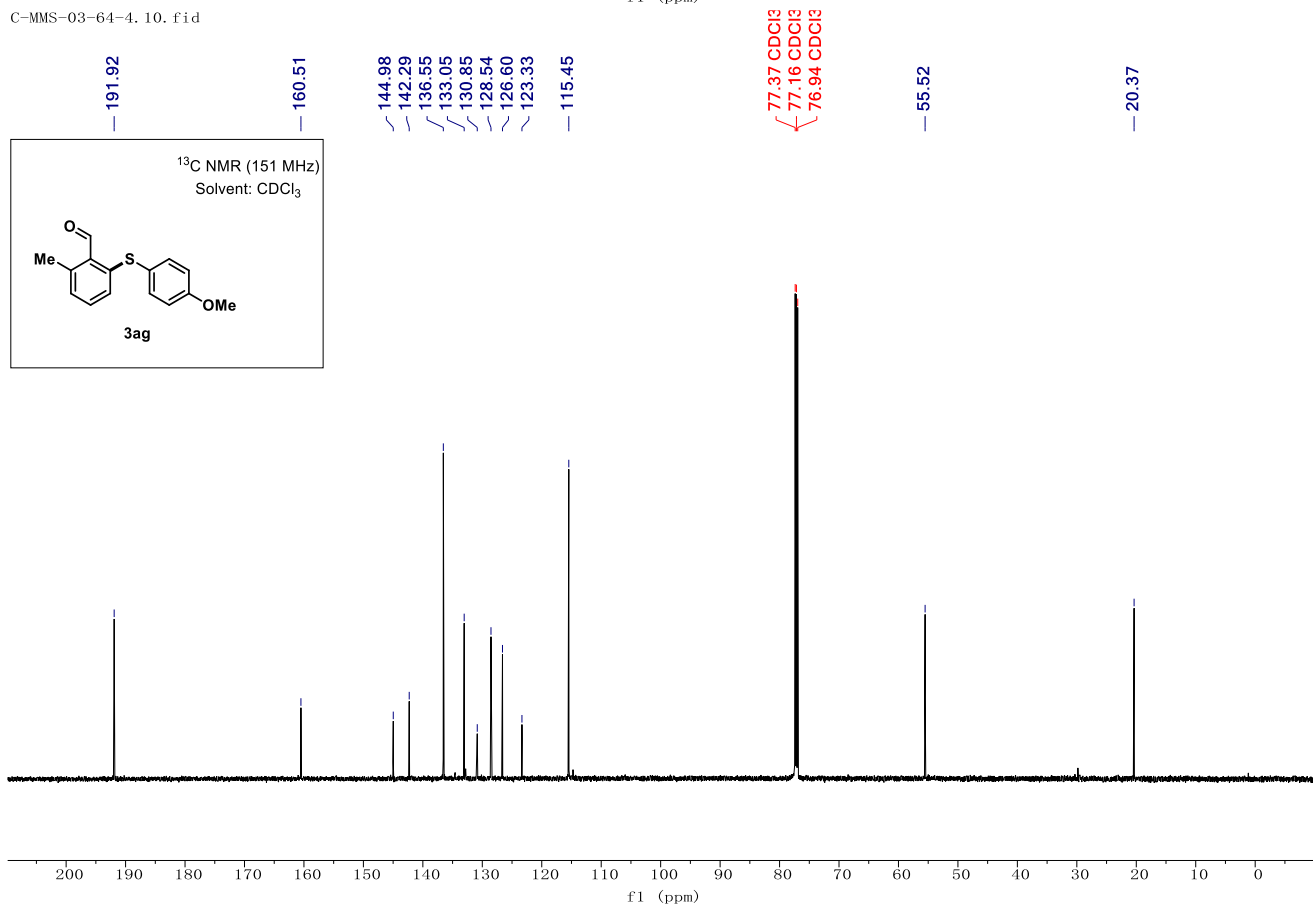

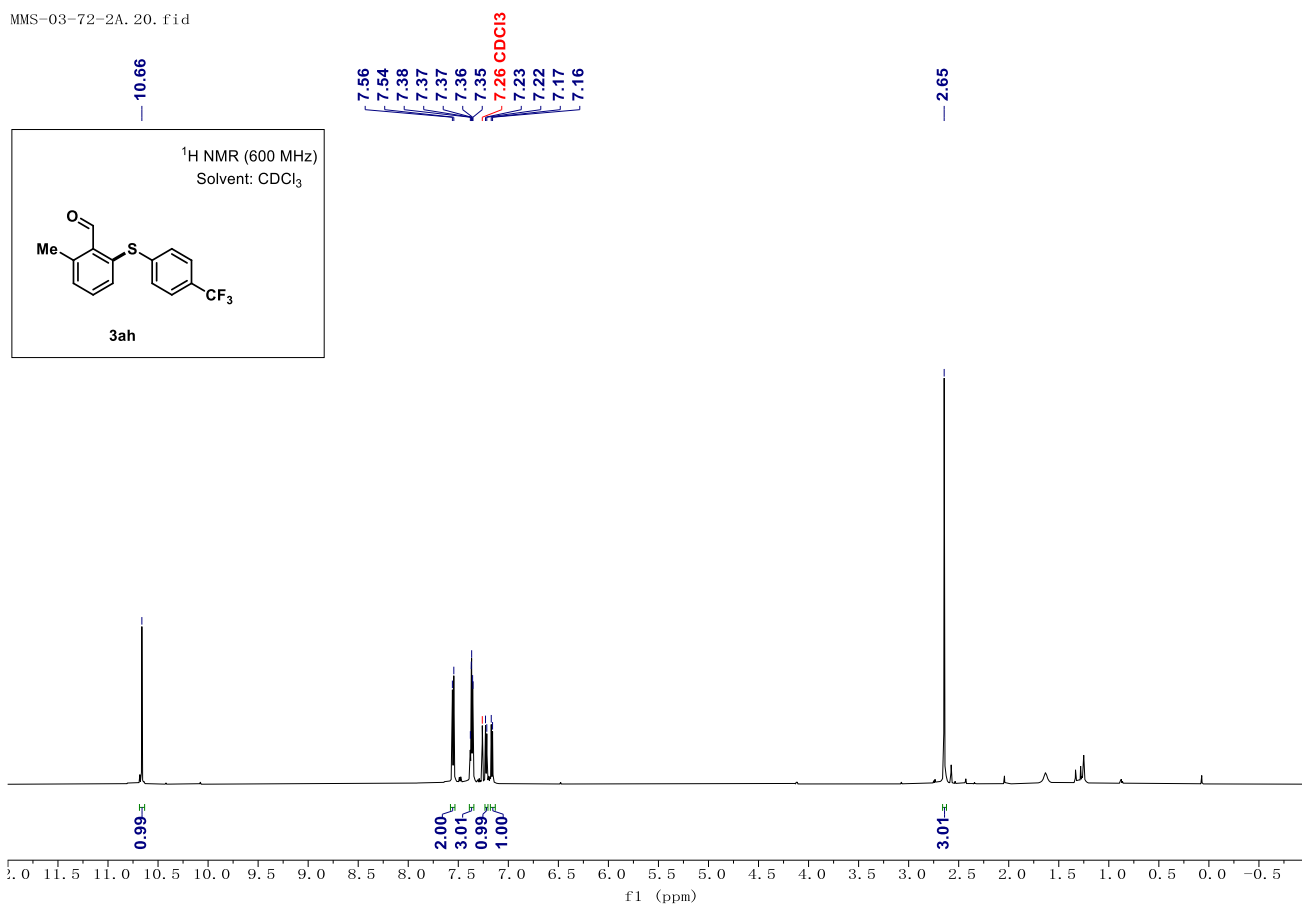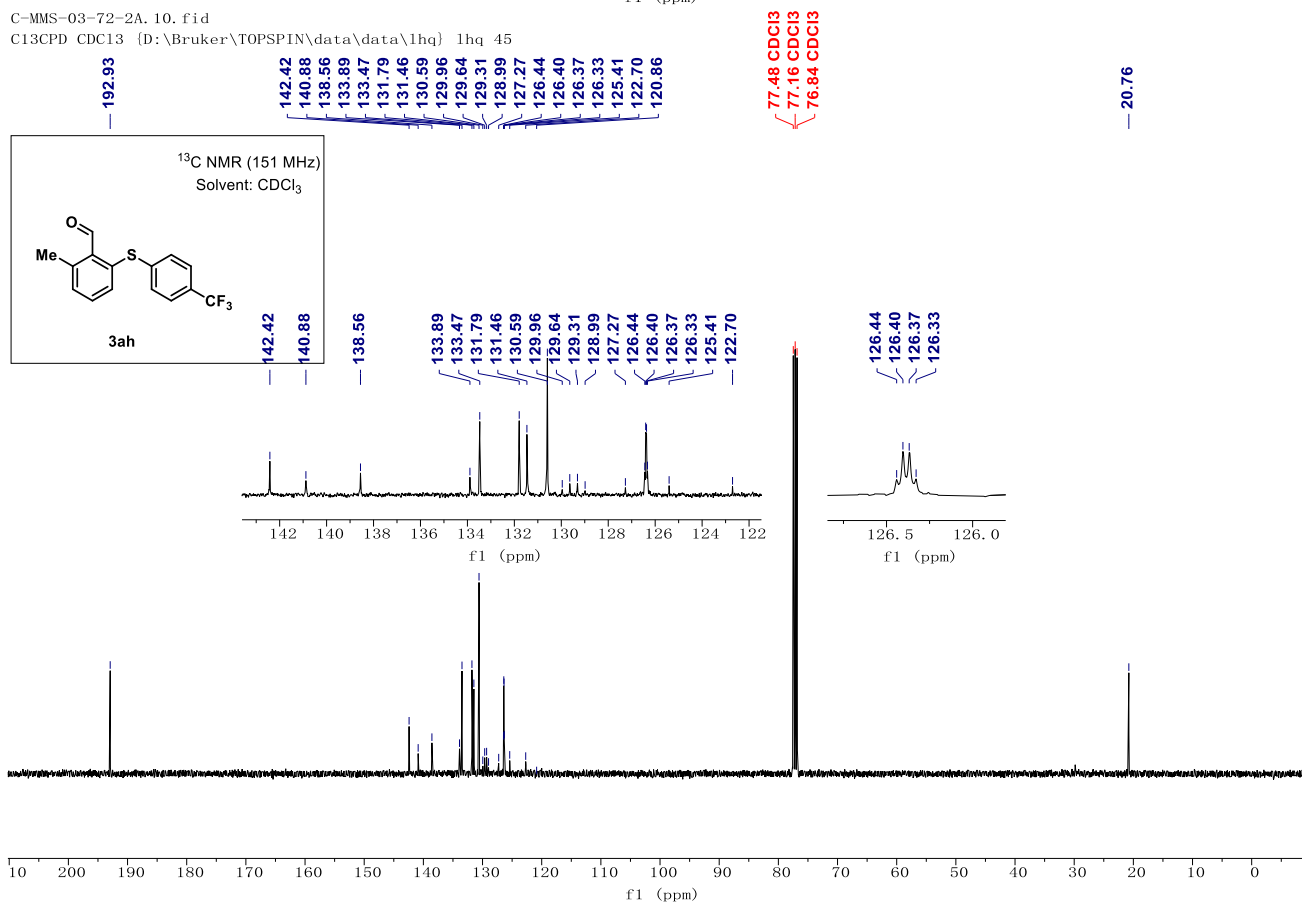



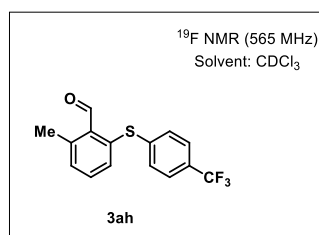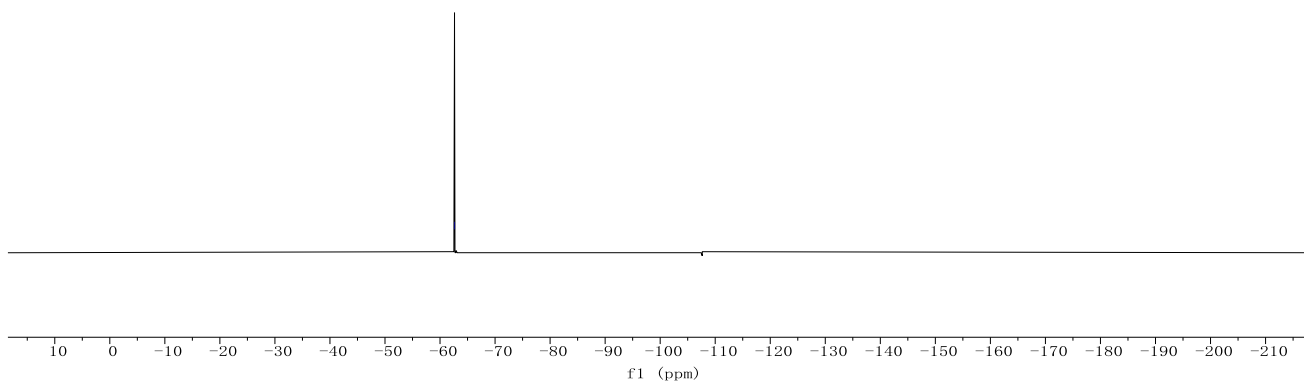

MMS-03-64-5A. 20. fid

PROTON CDC13 {D:\Bruker\TOPSPIN\data\data\lhq} lhq 33

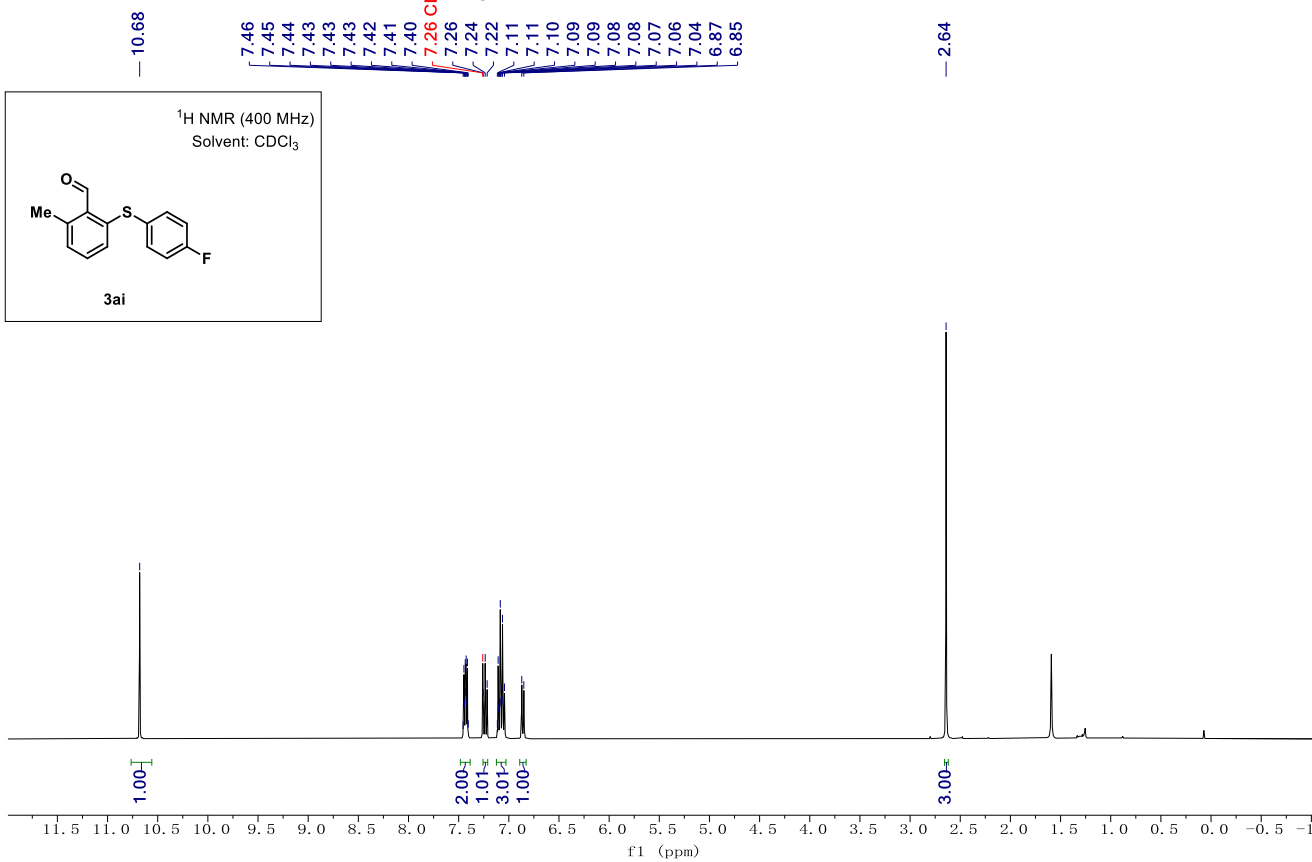

c-mms-03-64-5. 10. fid

C13CPD CDC13 {D:\Bruker\TOPSPIN\data\data\lhq} lhq 55

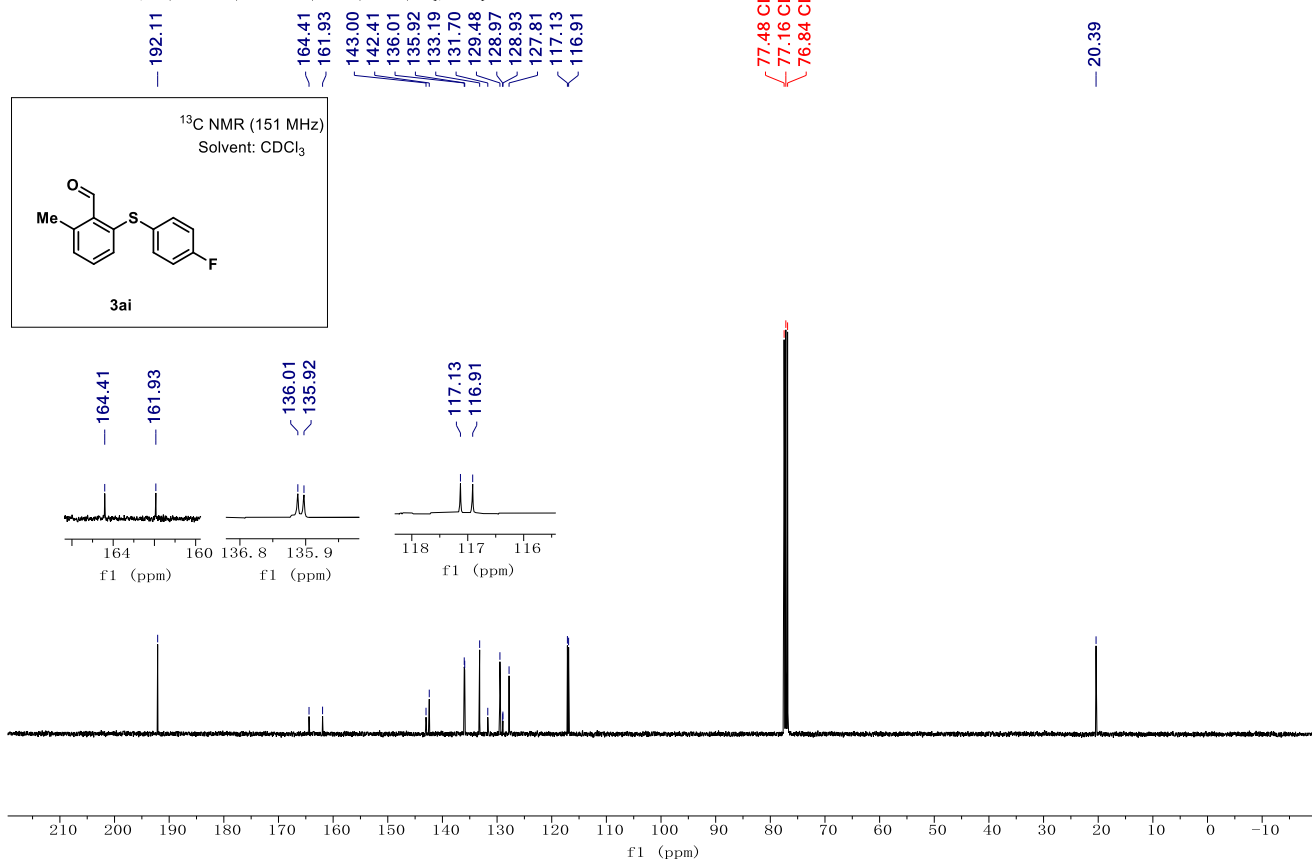

MMS-03-F-4PH-F\_10.fid  
F19CPD CDC13 {D:\Bruker\TOPSPIN\data\data\1hq} 1hq 19

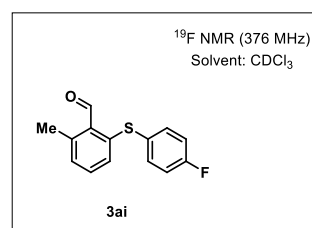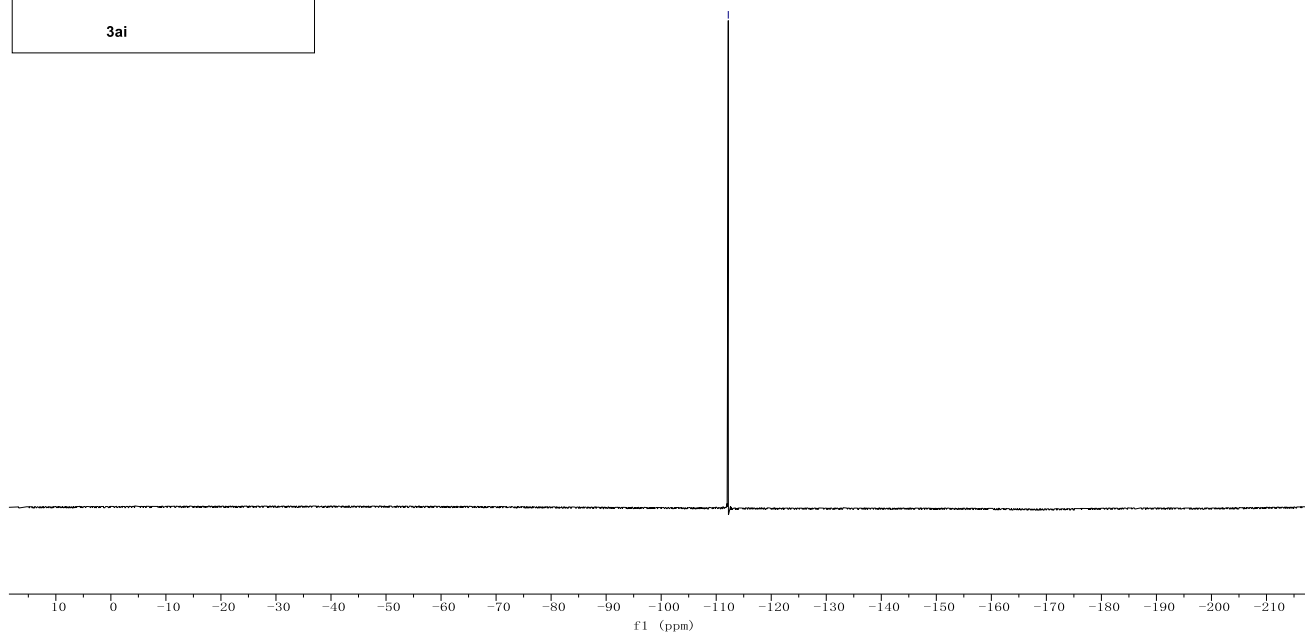

mms-03-64-7a. 10. fid

PROTON CDC13 {D:\Bruker\TOPSPIN\data\data\lhq} 1h 45

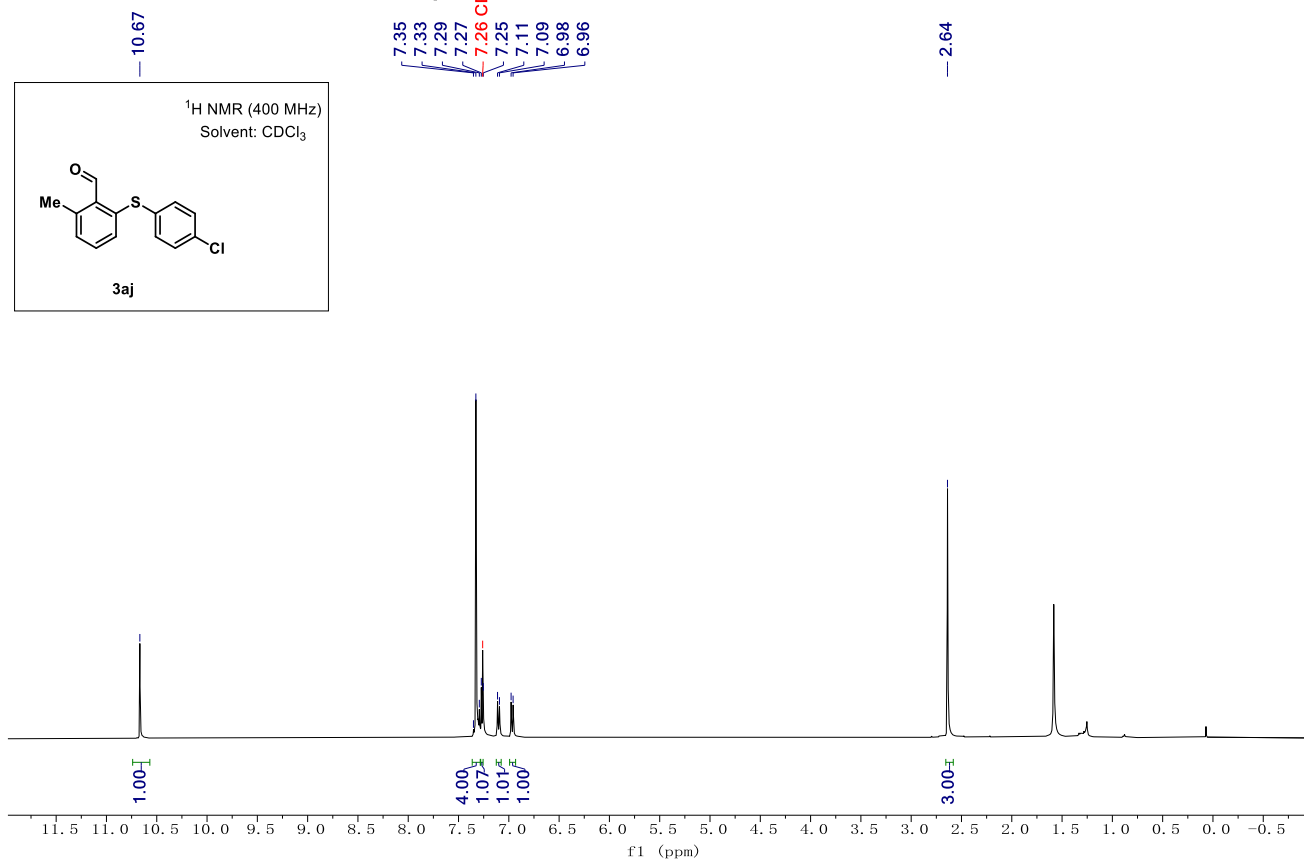

c-mms-03-64-7. 10. fid

C13CPD CDC13 {D:\Bruker\TOPSPIN\data\data\lhq} 1h 56

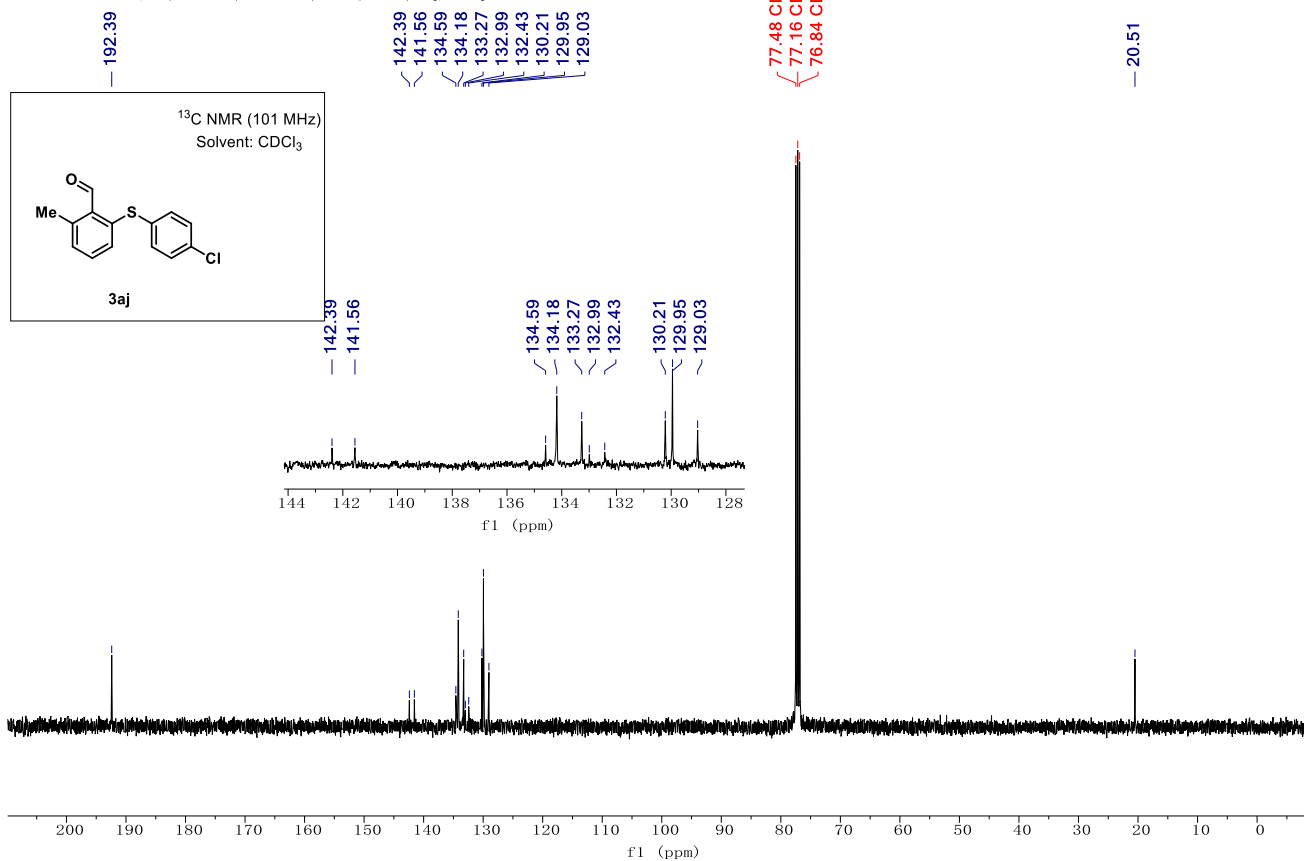

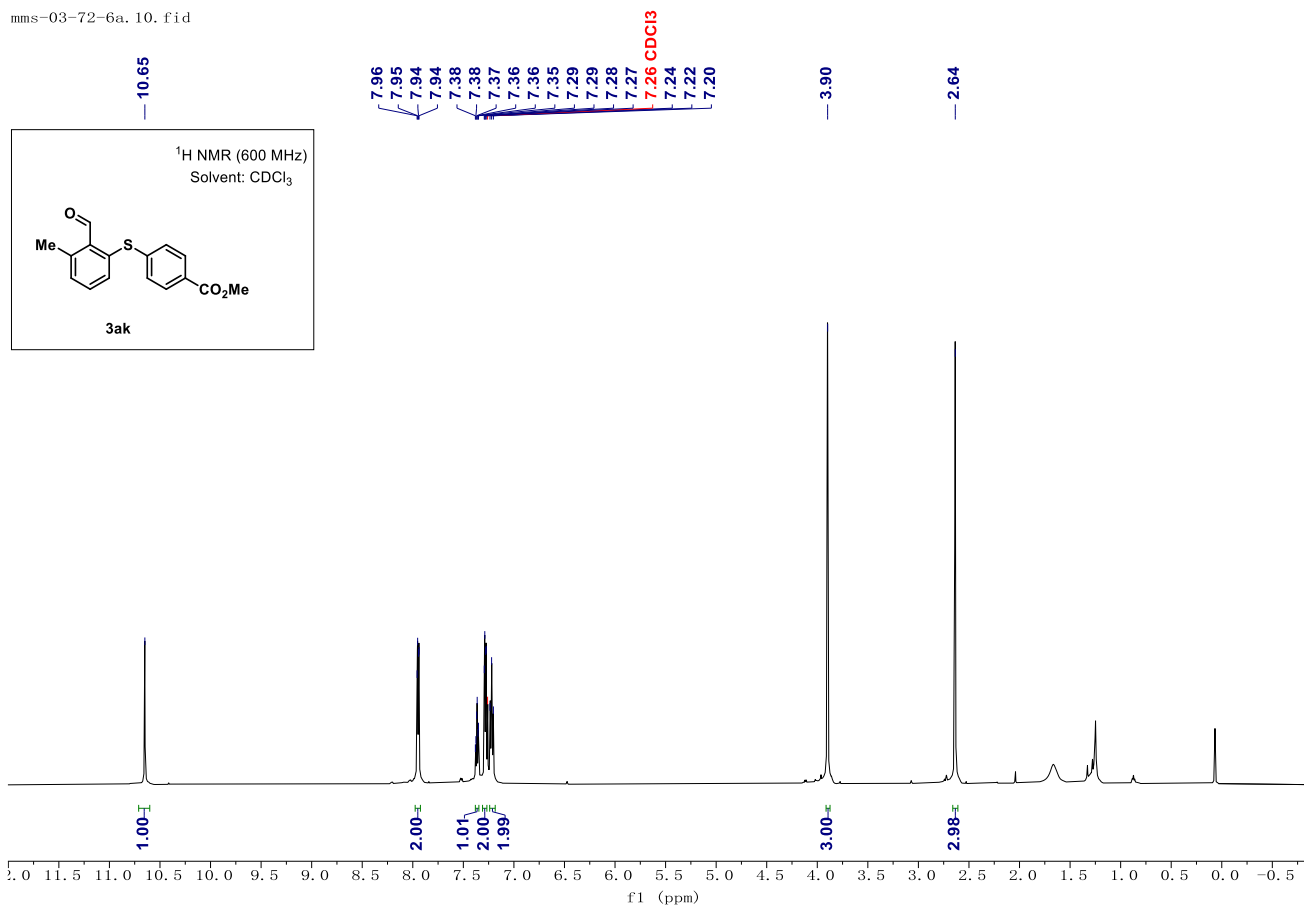

C-MMS-03-72-6A. 10. fid

C13CPD CDC13 {D:\Bruker\TOPSPIN\data\data\lhq} lhq 46

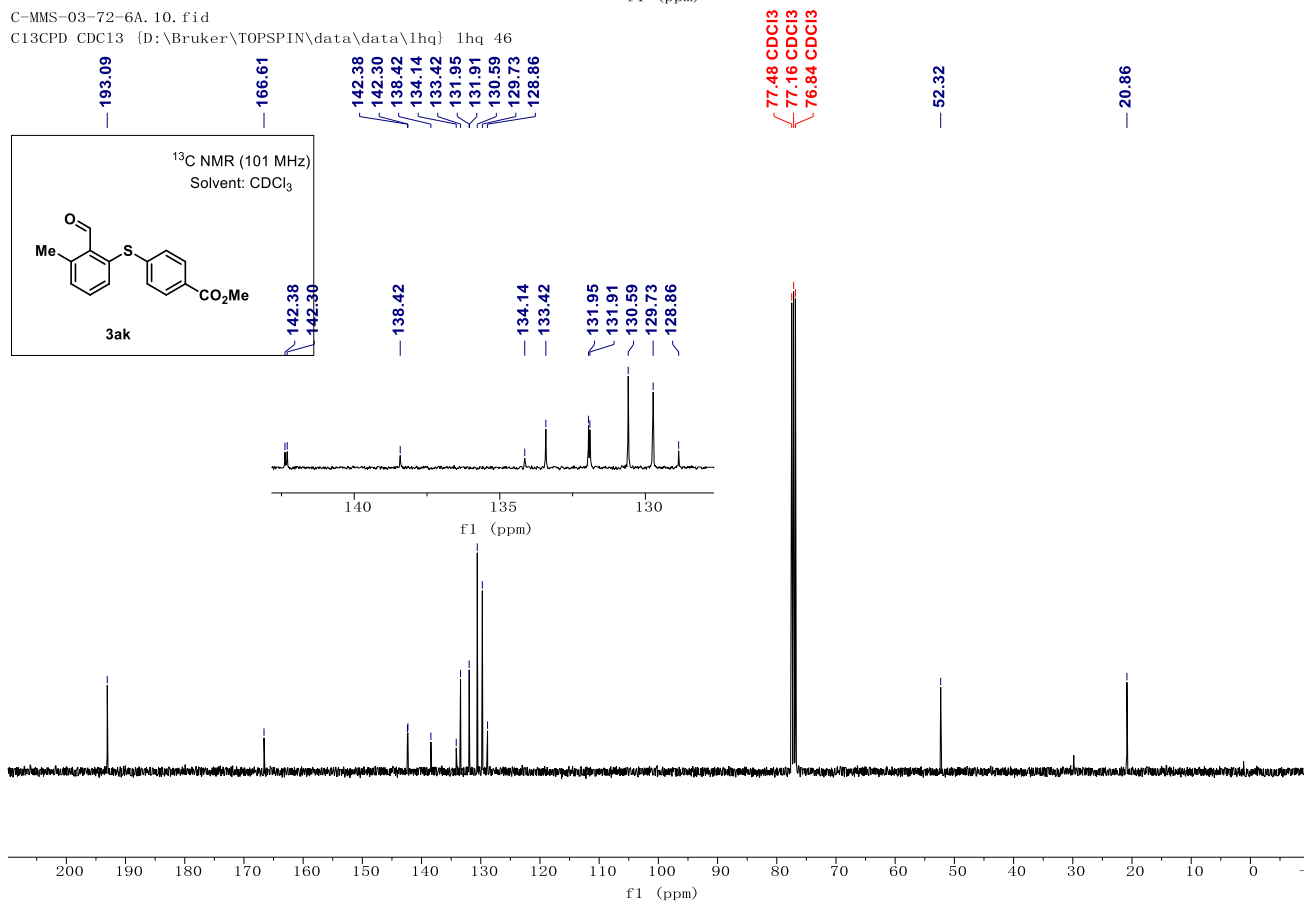

H-MMS-03-72-4. 10. fid

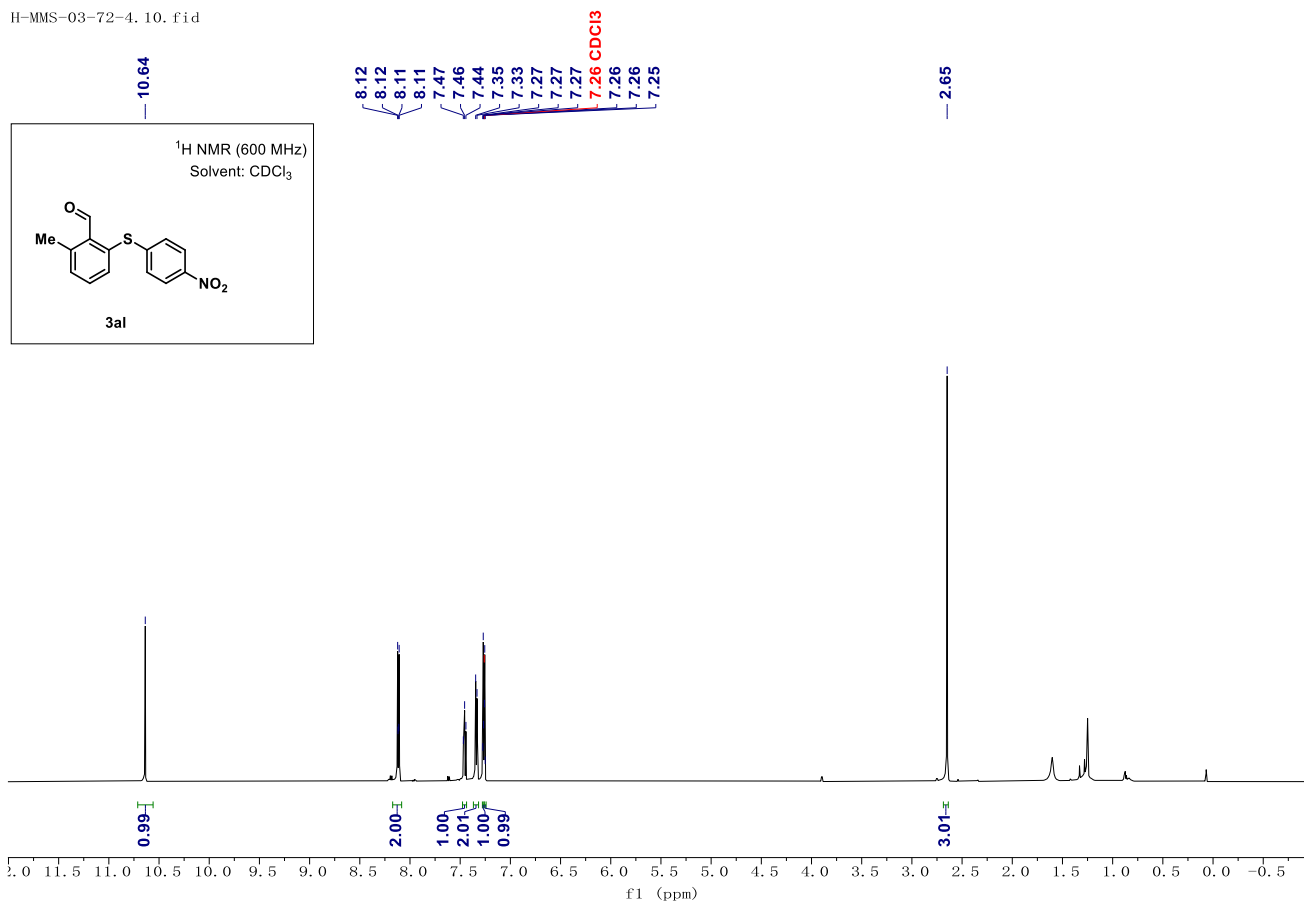

C-MMS-03-72-4. 10. fid

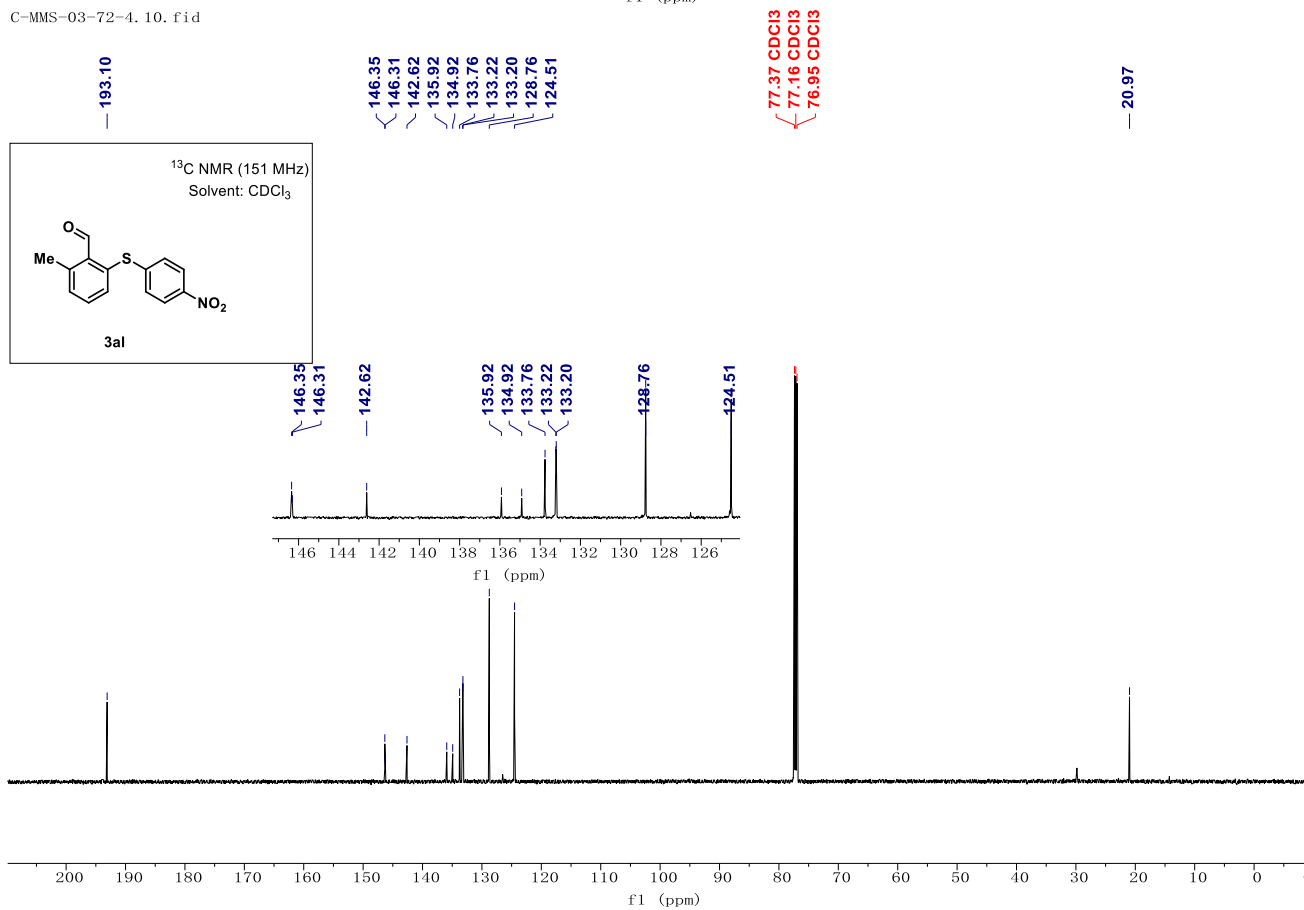

MMS-03-163-9. 10. fid  
 PROTON CDCl3 [D:\Bruker\TOPSPIN\data\data\1h] 1h 58

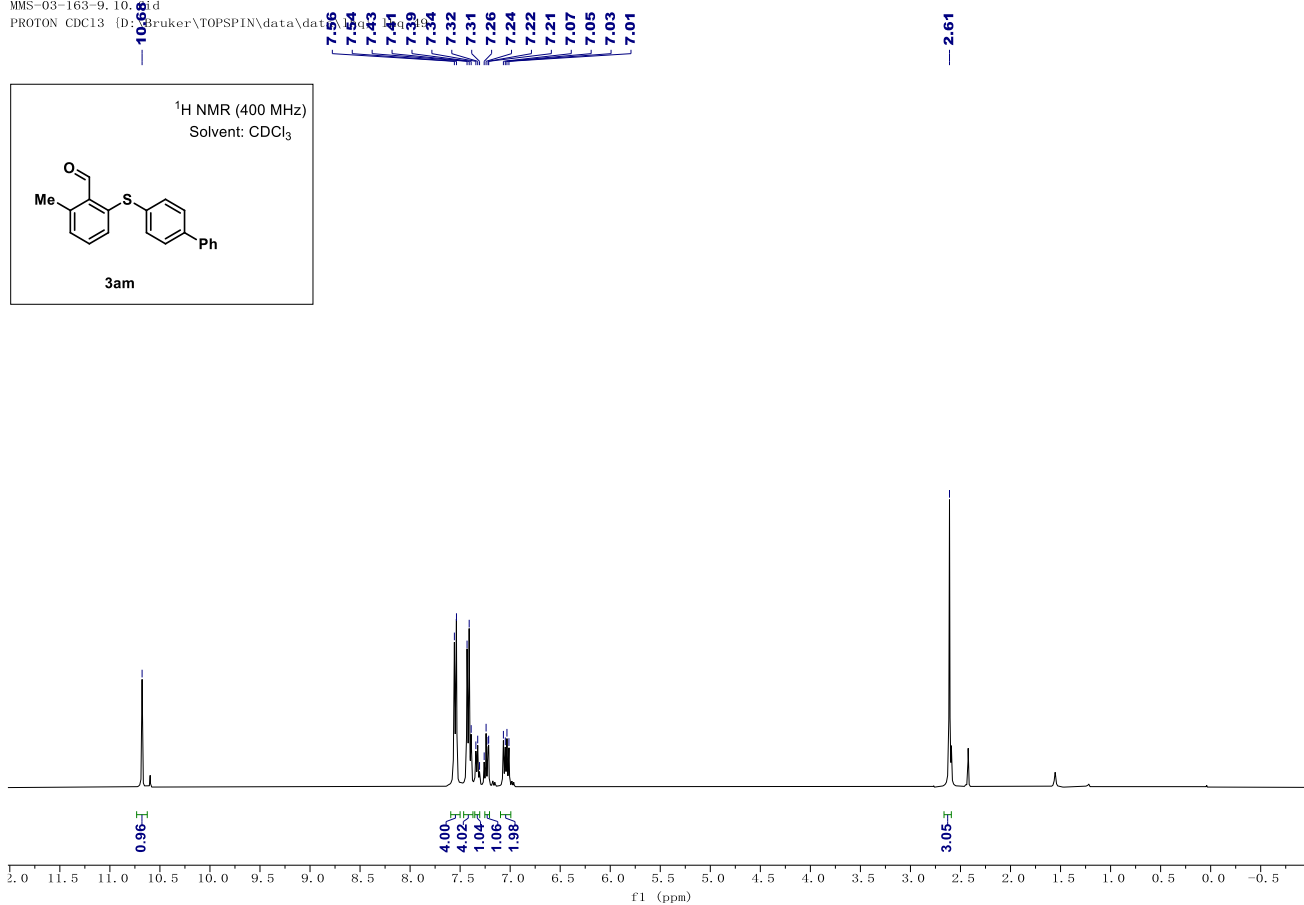

MMS-03-163-9B. 10. fid  
 C13CPD CDCl3 [D:\Bruker\TOPSPIN\data\data\1h] 1h 58

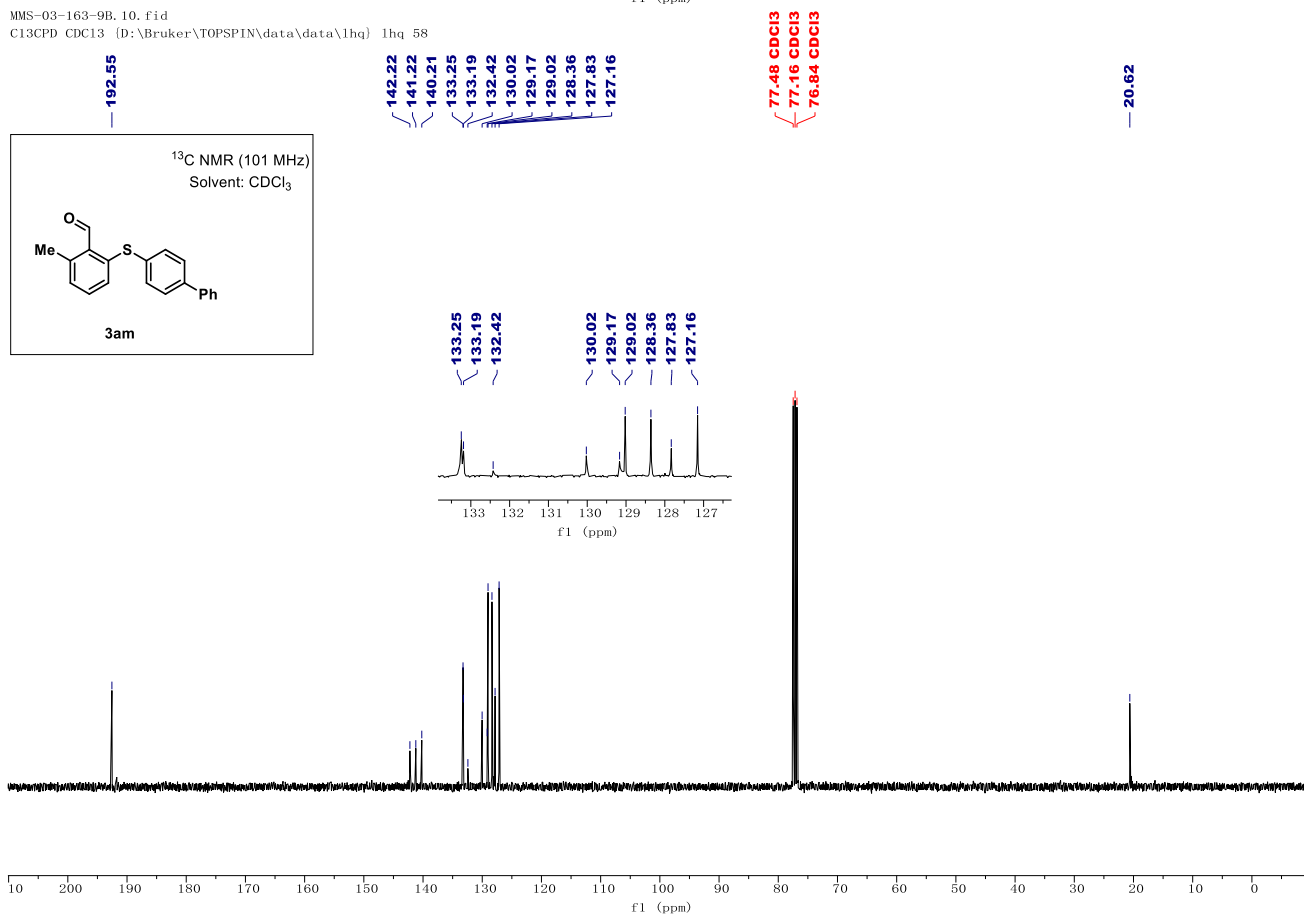

MMS-03-114-2. 10. fid

PROTON CDC13 {D:\Bruker\TOPSPIN\data\data\1hq} 1hq

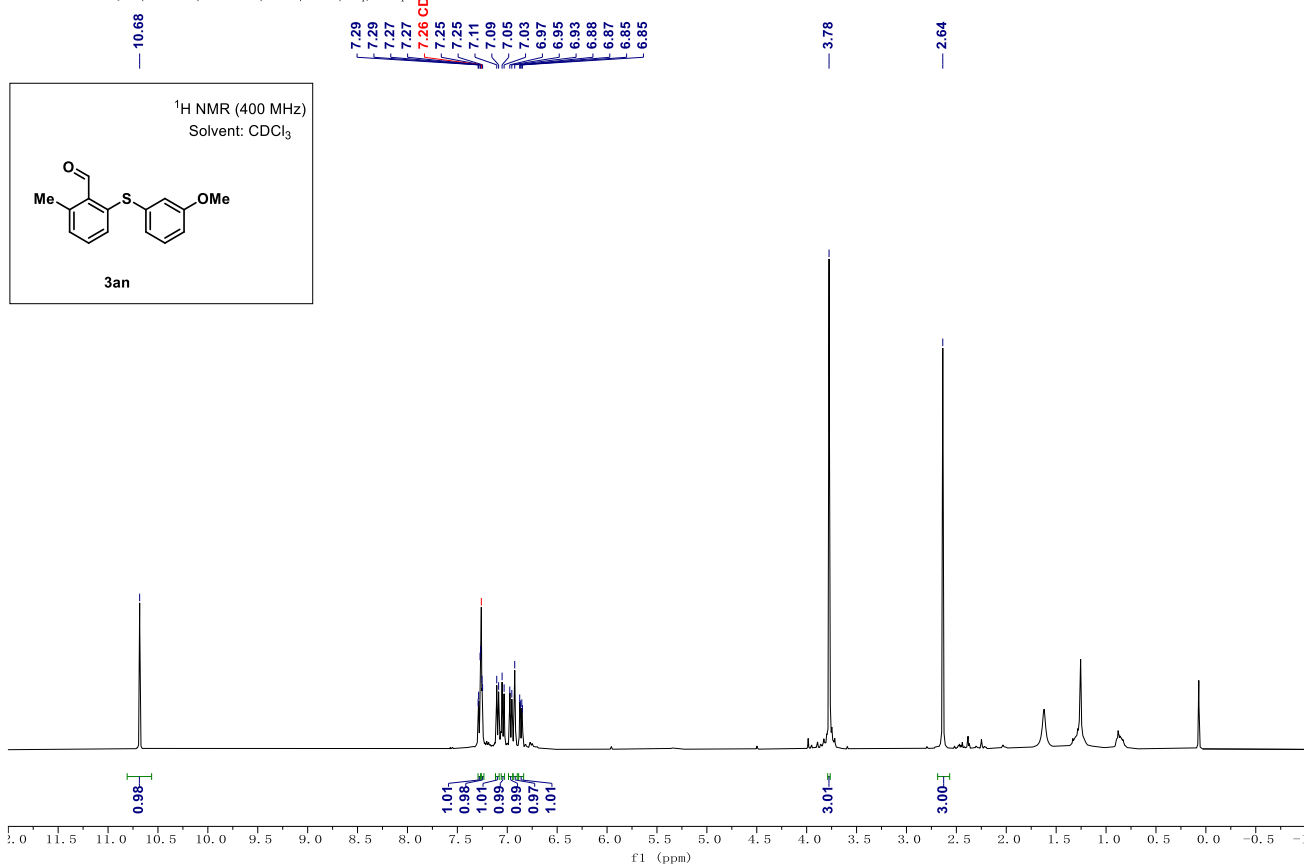

MMS-03-114-2. 11. fid

C13CPD CDC13 {D:\Bruker\TOPSPIN\data\data\1hq} 1hq 7

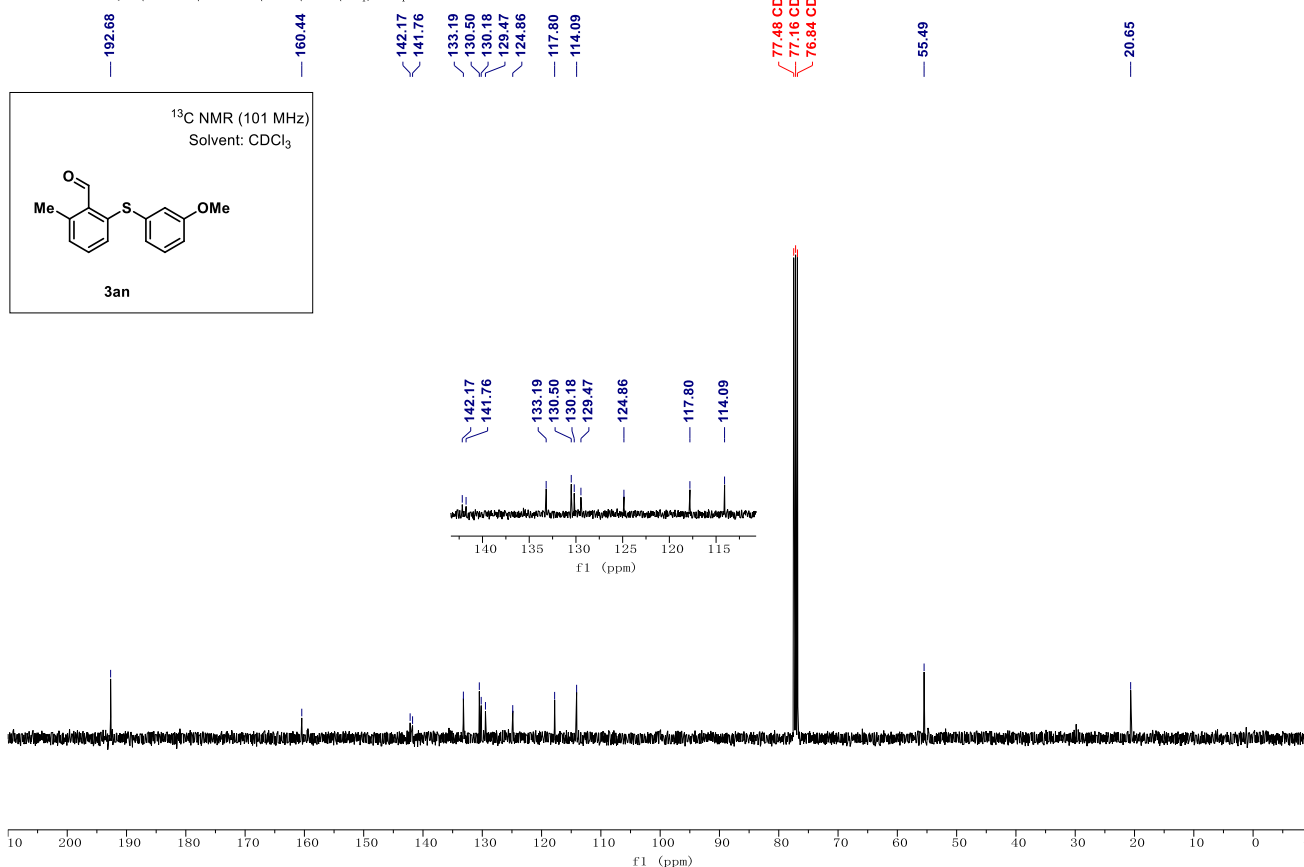



mms-03-67-4a. 10. fid

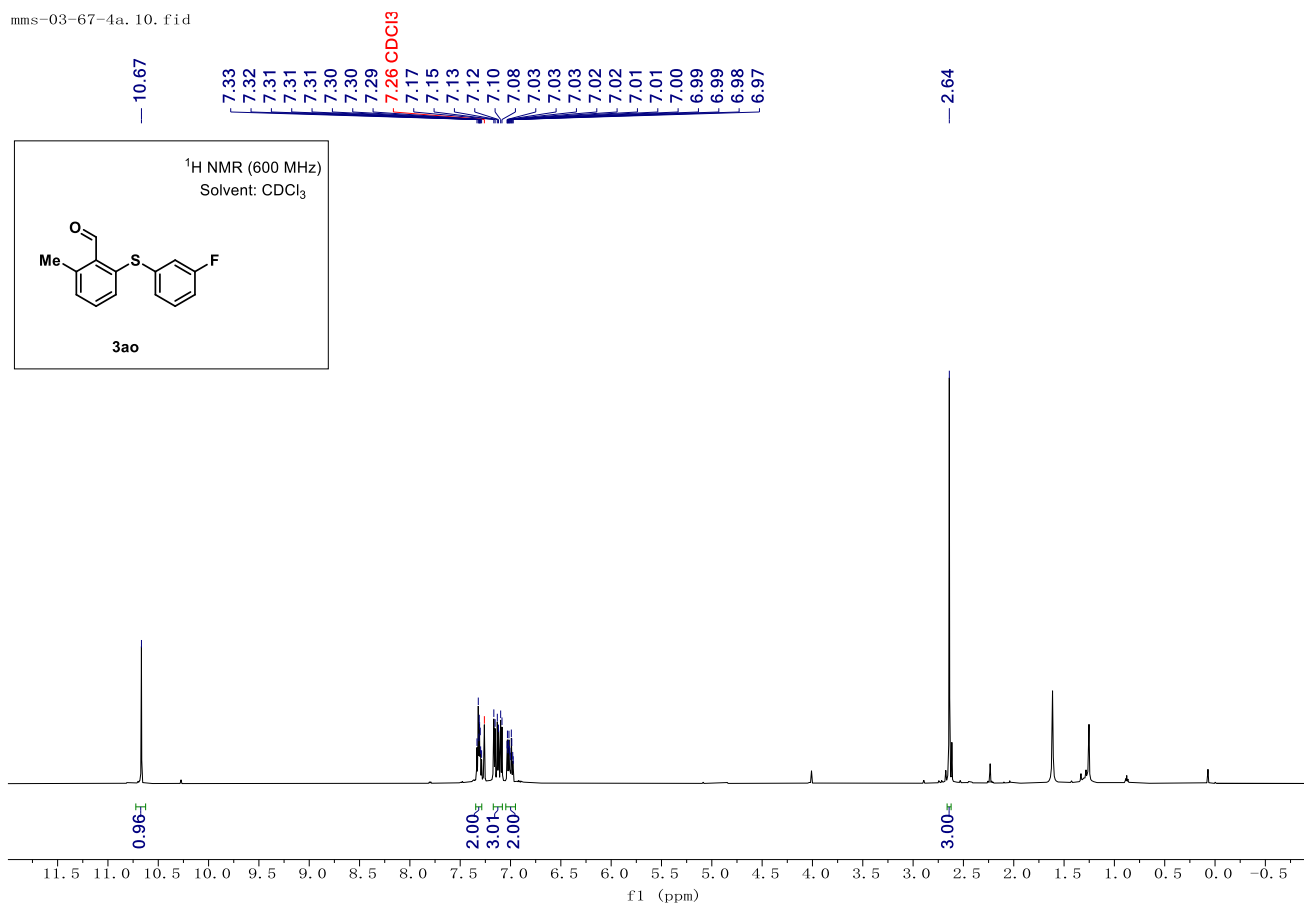

c-mms-03-67-4a. 10. fid

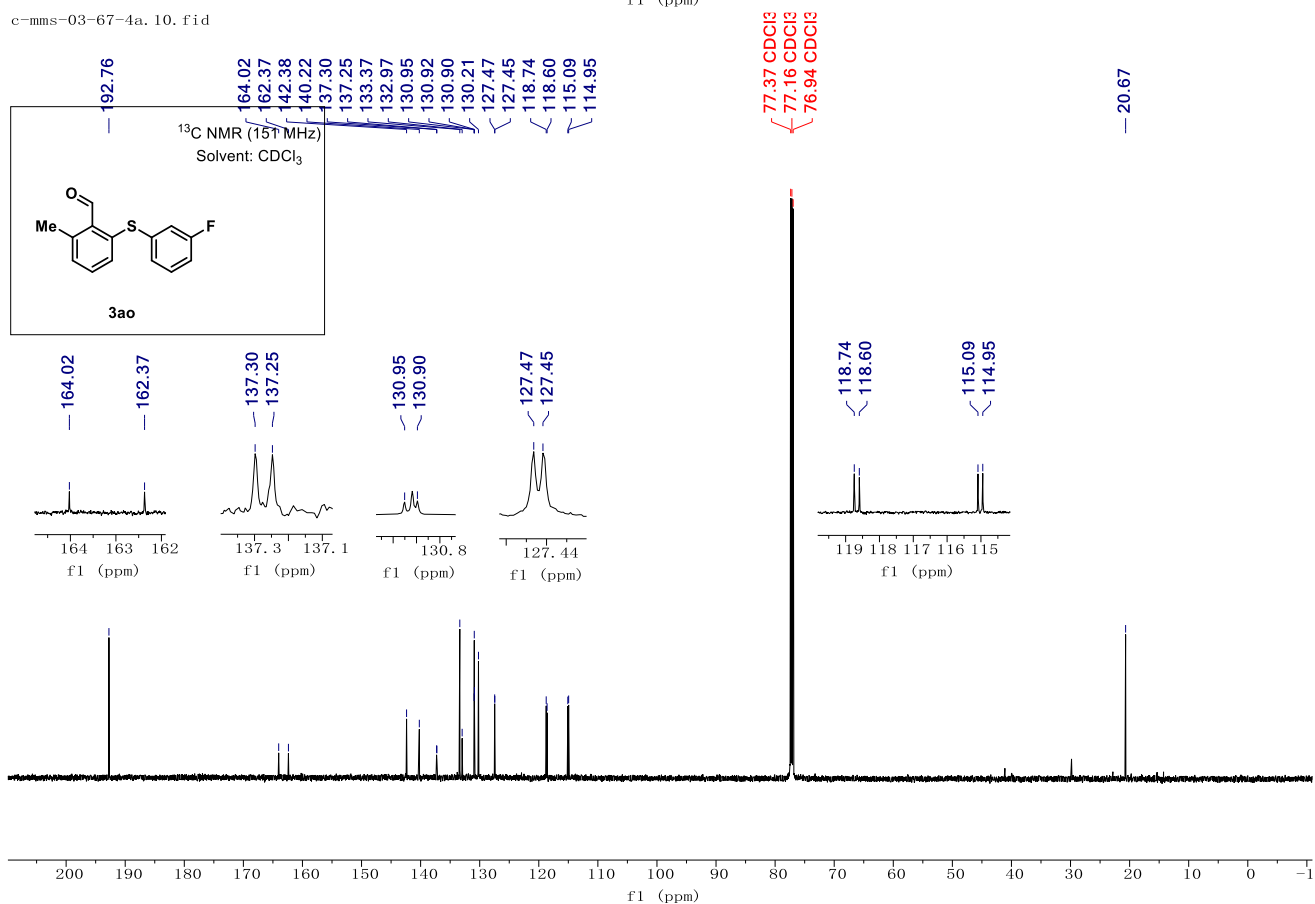

f-mms-03-67-4a. 10. fid

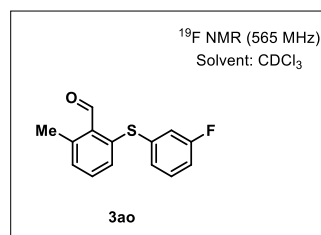

--111.28

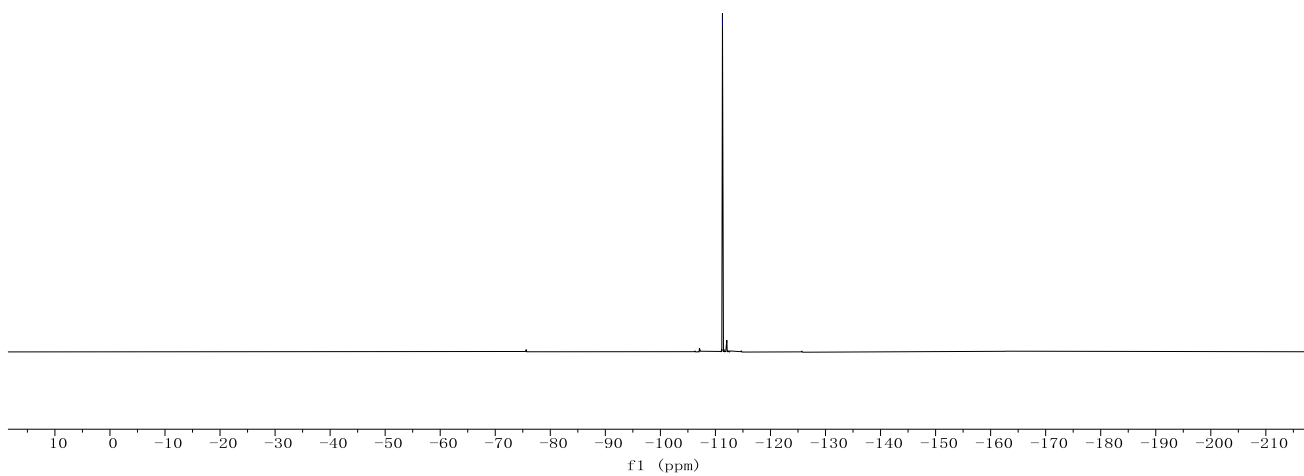

mms-03-10-1a. 10. fid

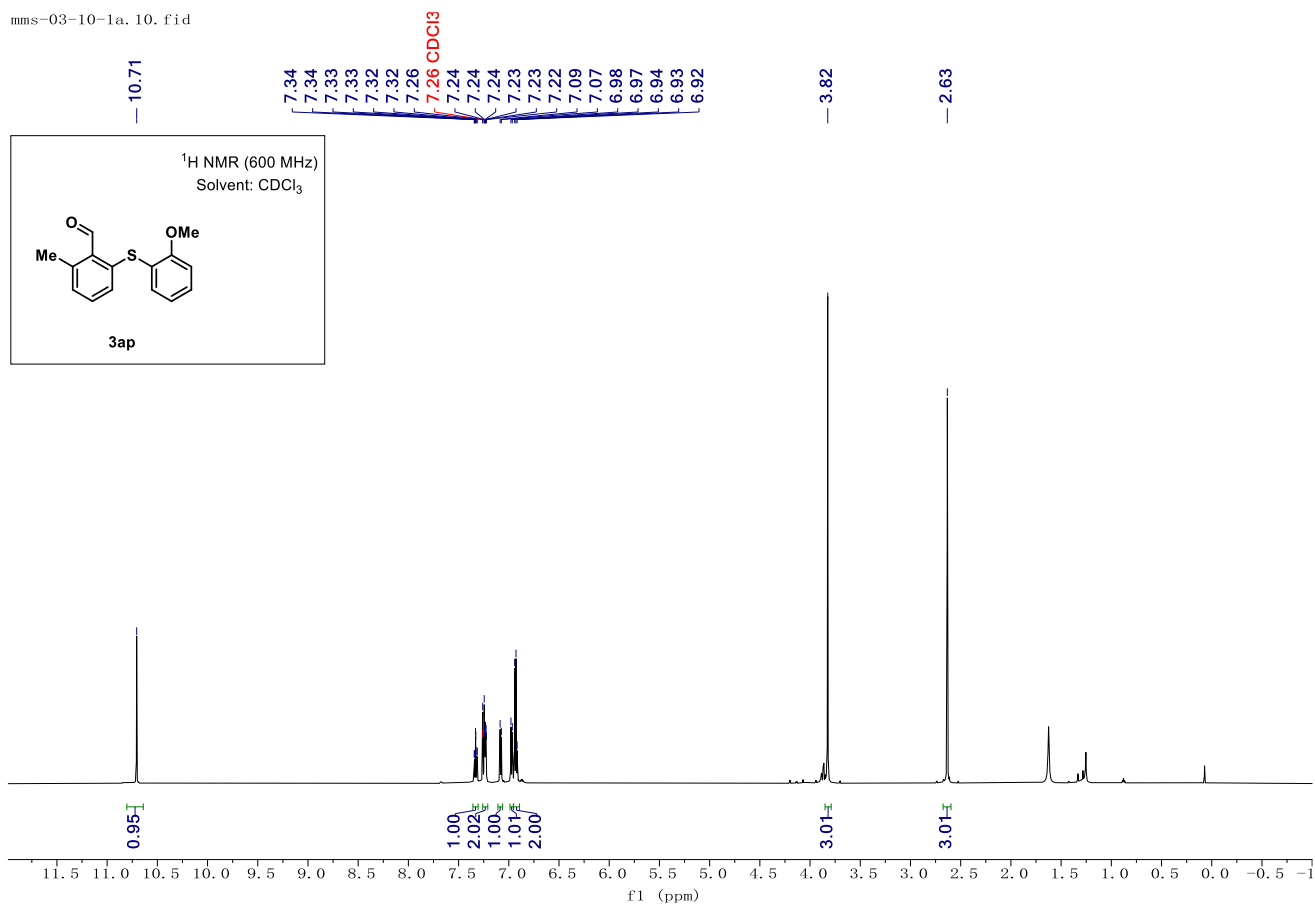

c-mms-03-10-1a. 10. fid

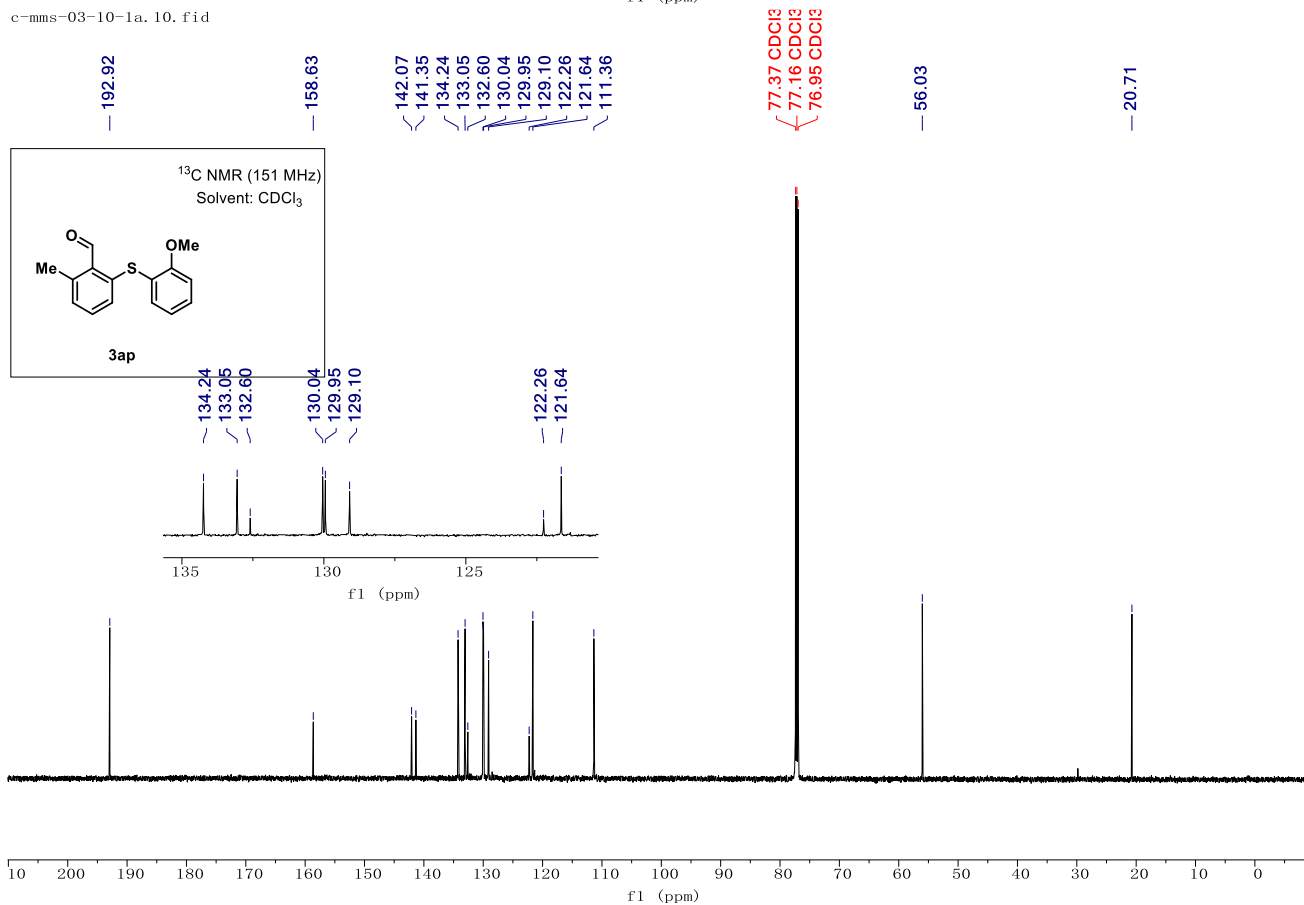

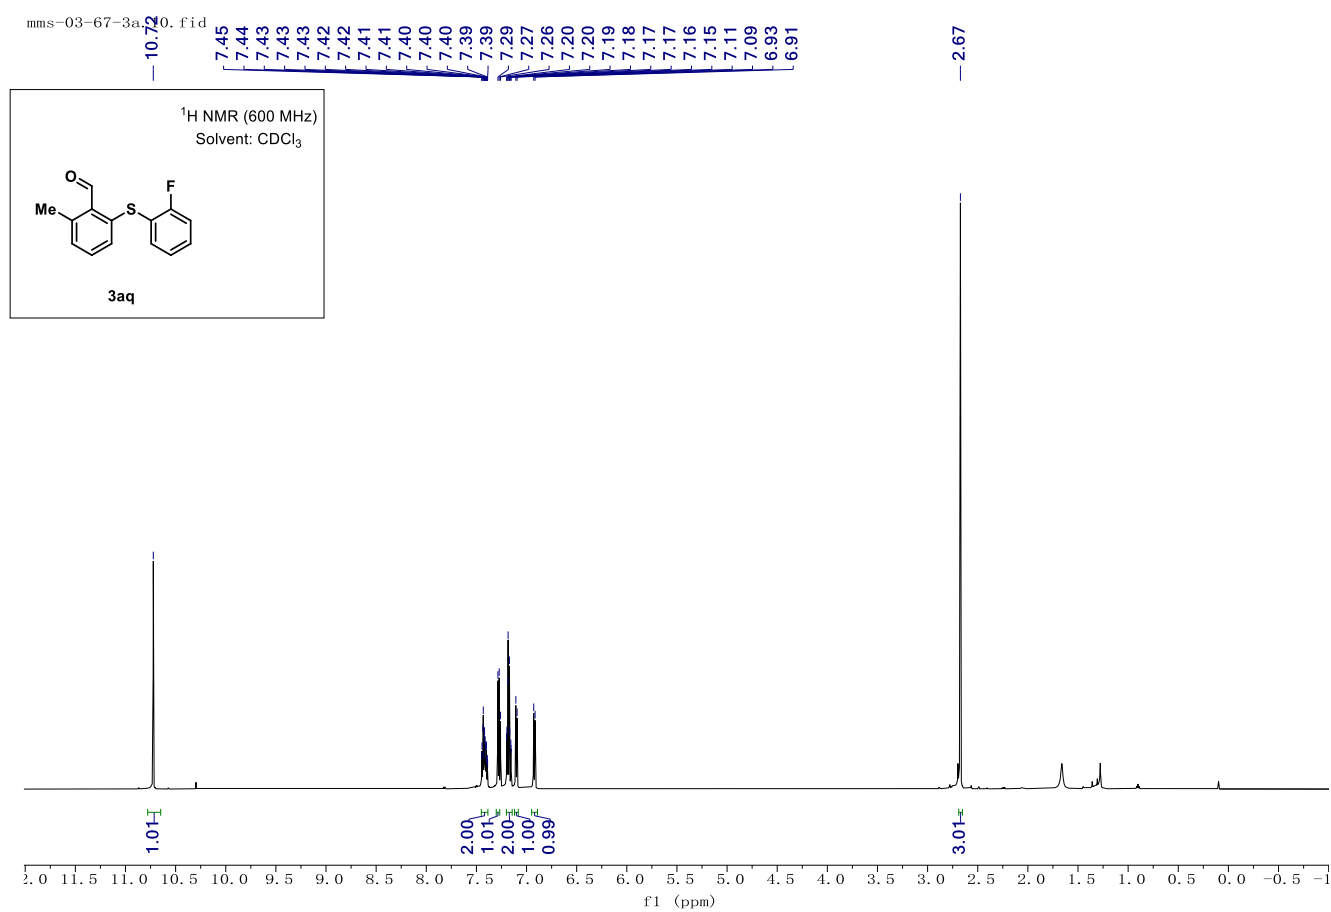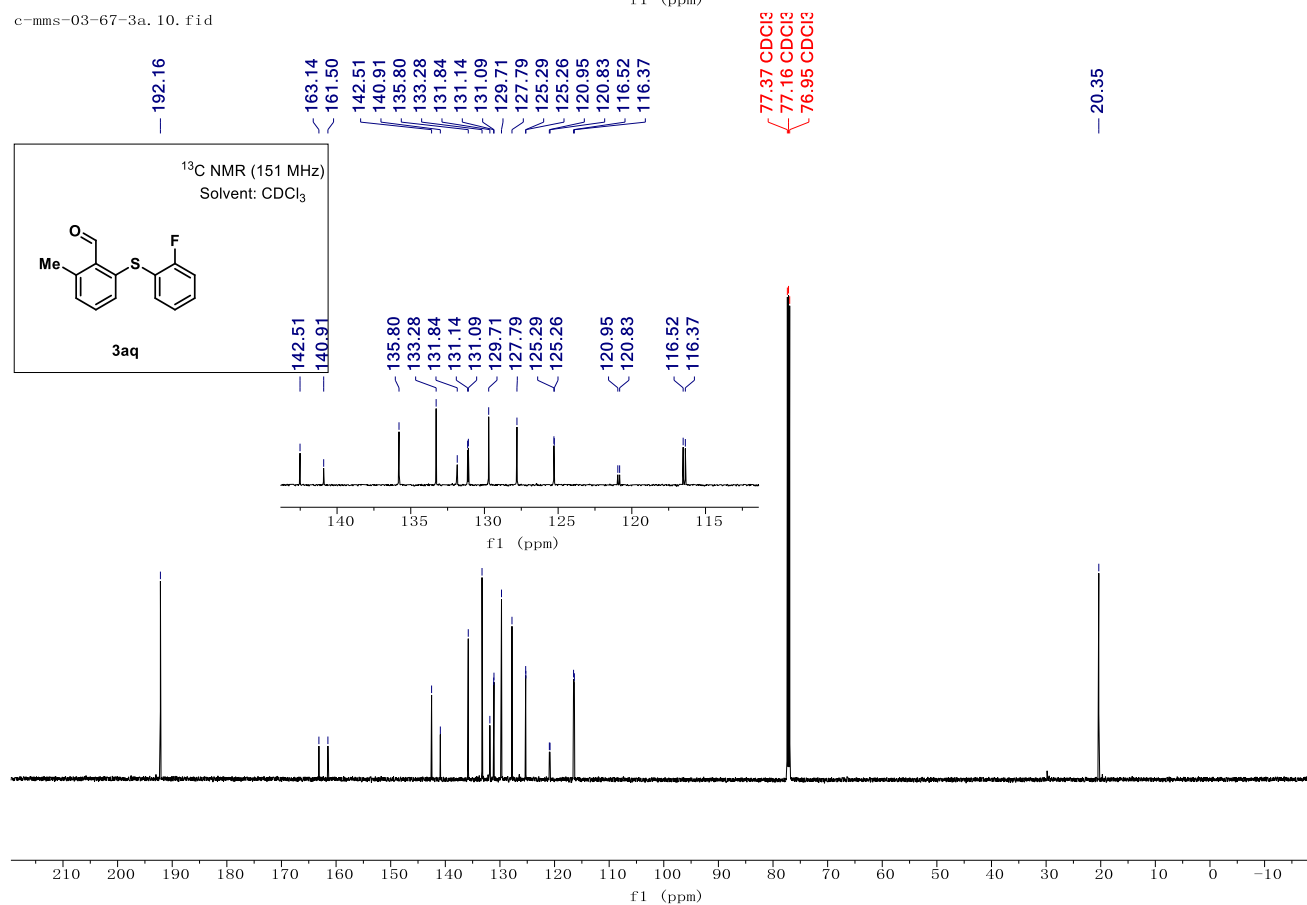

f-mms-03-67-3a. 10. fid

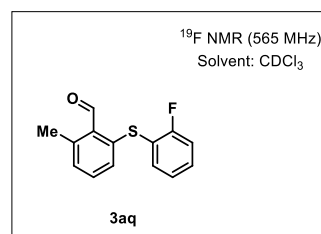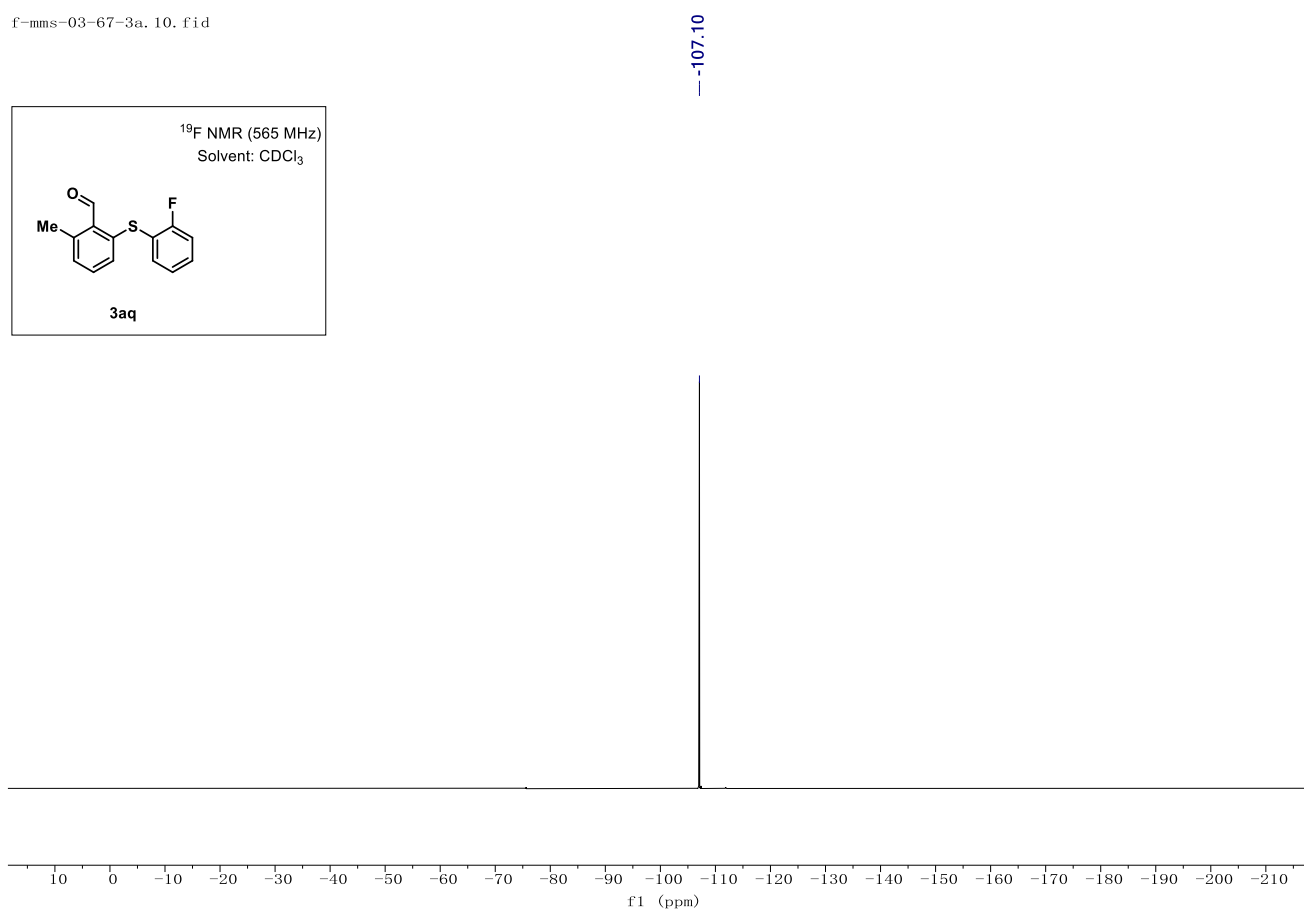

MMS-03-82-5B. 11. fid  
 PROTON CDC13 {D:\Bruker\TOPSPIN\data\data  
 10.83 7.38 7.36 7.35 7.26 7.21 7.19 7.17 7.12 7.10 2.65

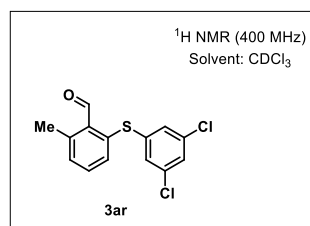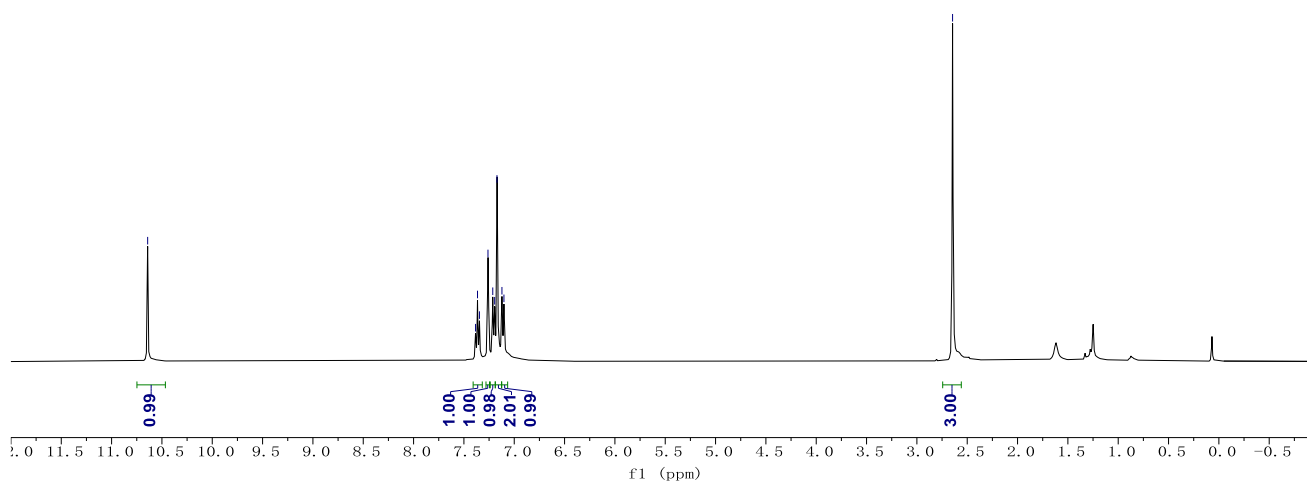

MMS-03-82-5B. 11. fid  
 C13CPD CDC13 {D:\Bruker\TOPSPIN\data\data\lhq} lhq 7  
 192.53 142.55 139.00 138.61 135.90 133.54 131.61 130.83 129.21 127.92 77.48 CDC13 77.16 CDC13 76.84 CDC13 20.64

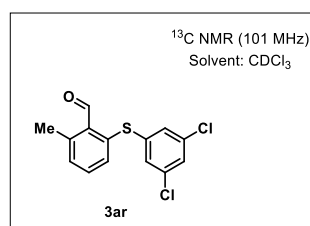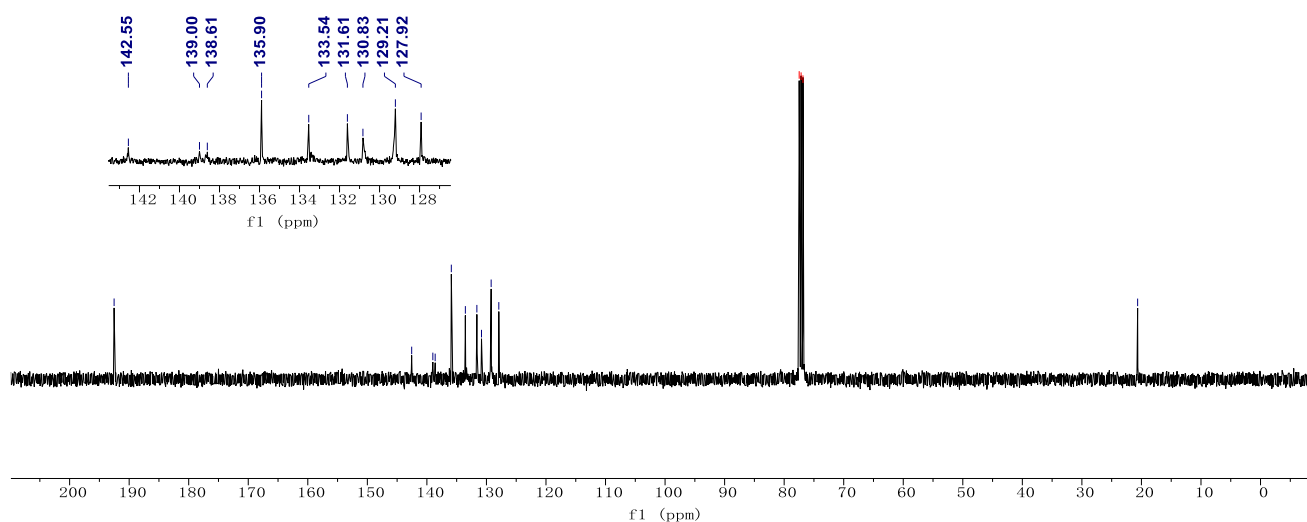

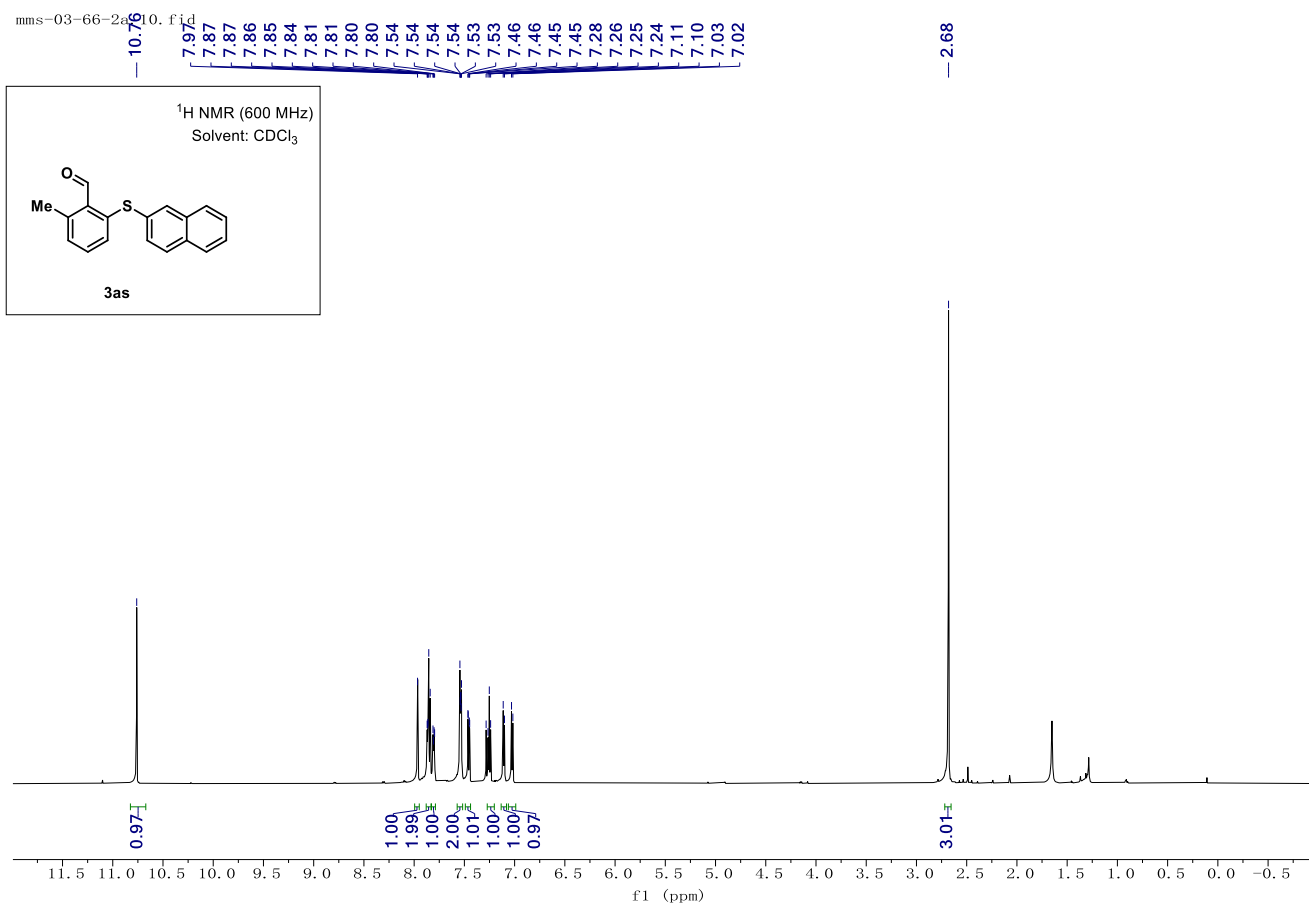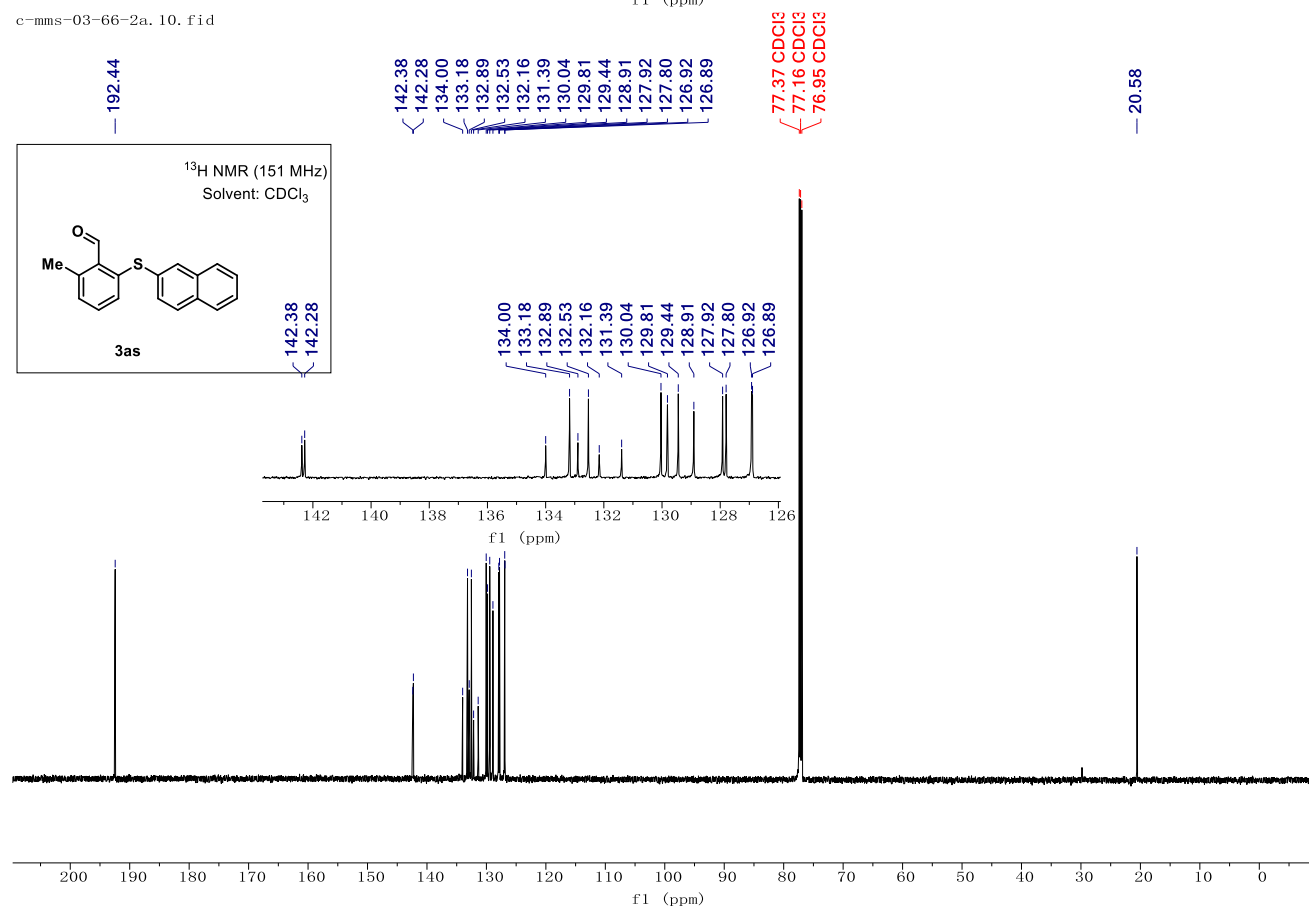

MMS-03-69-3. 10. fid

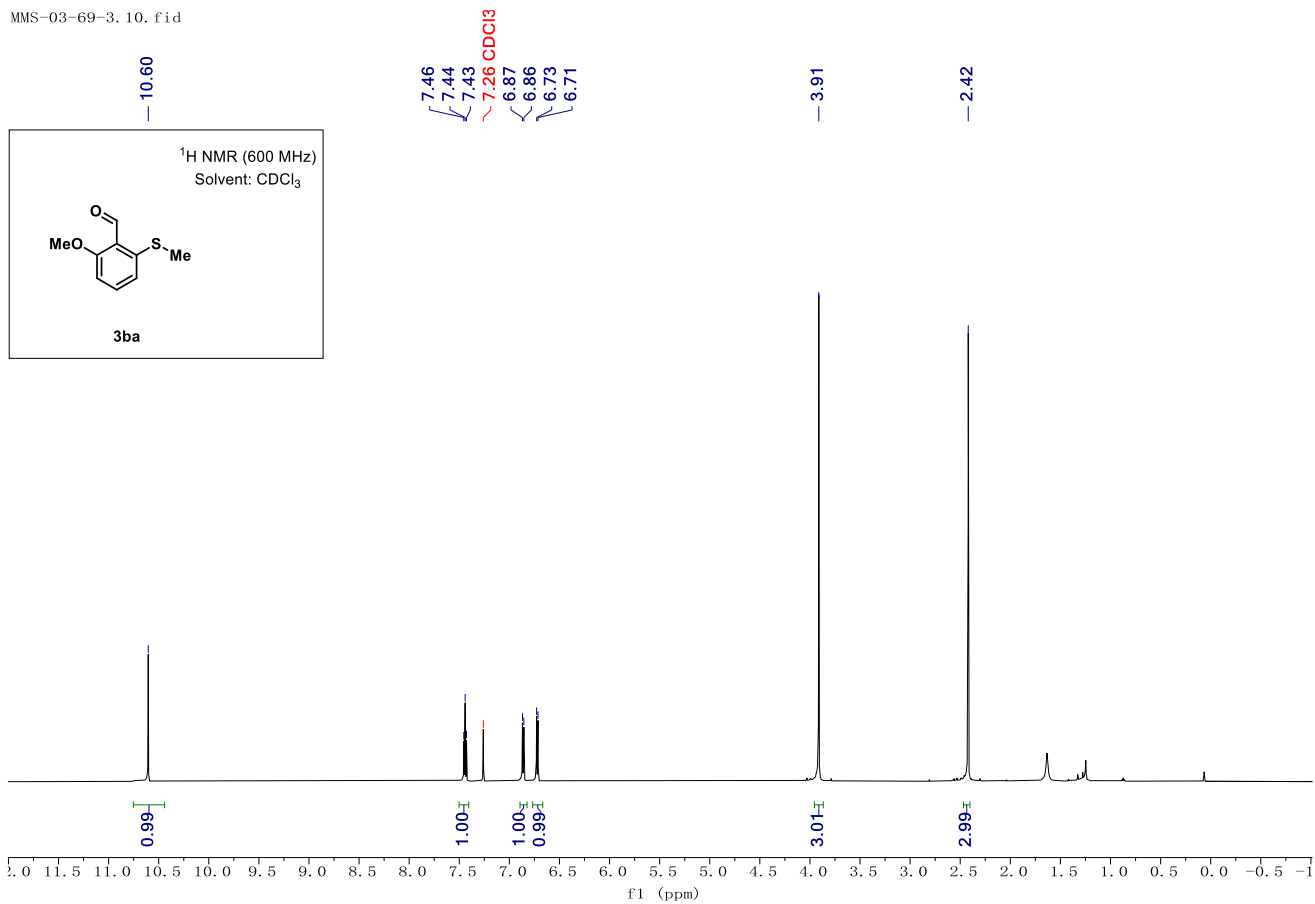

C-MMS-03-69-3. 10. fid

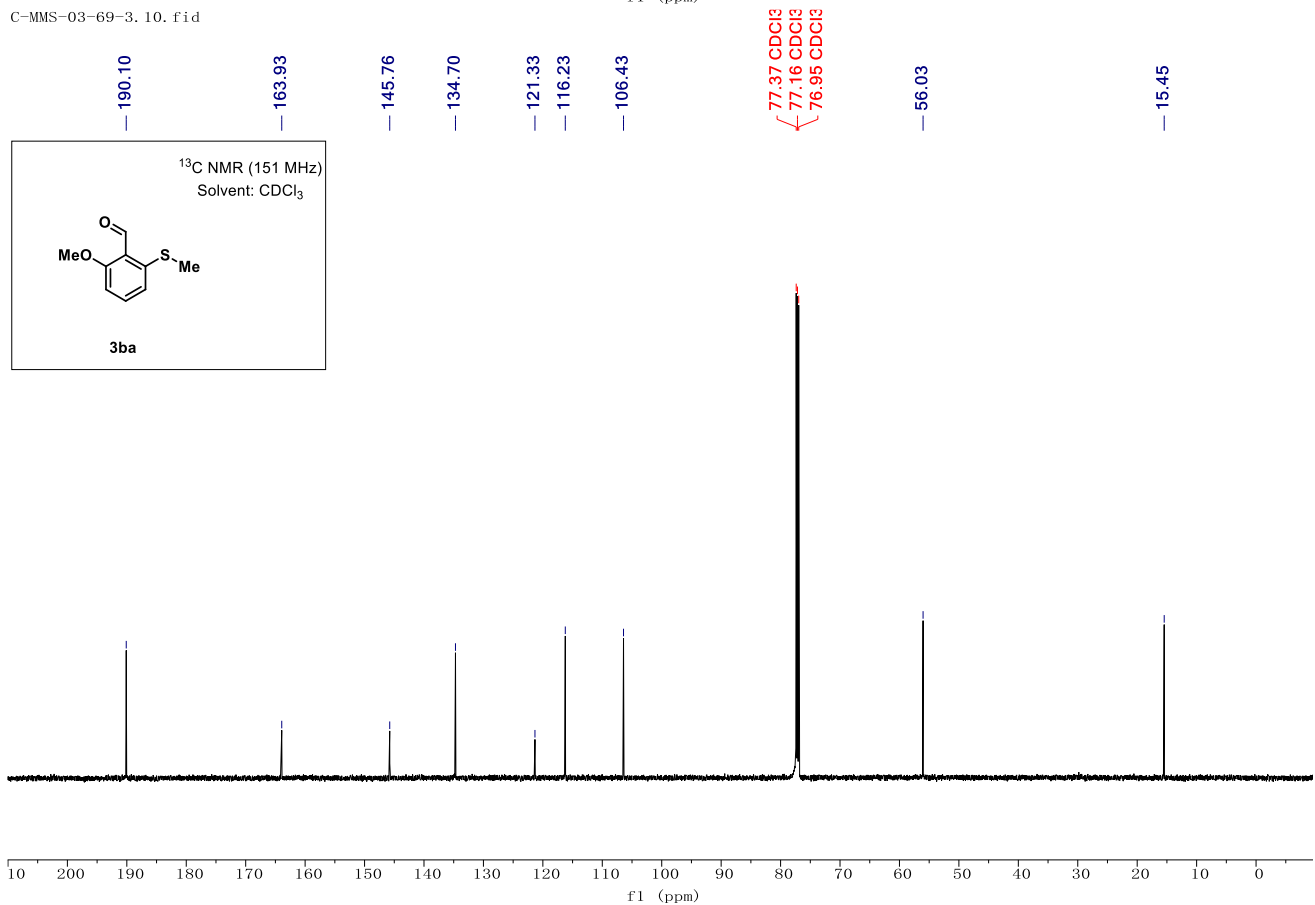



H-mms-03-77-1.20.fid

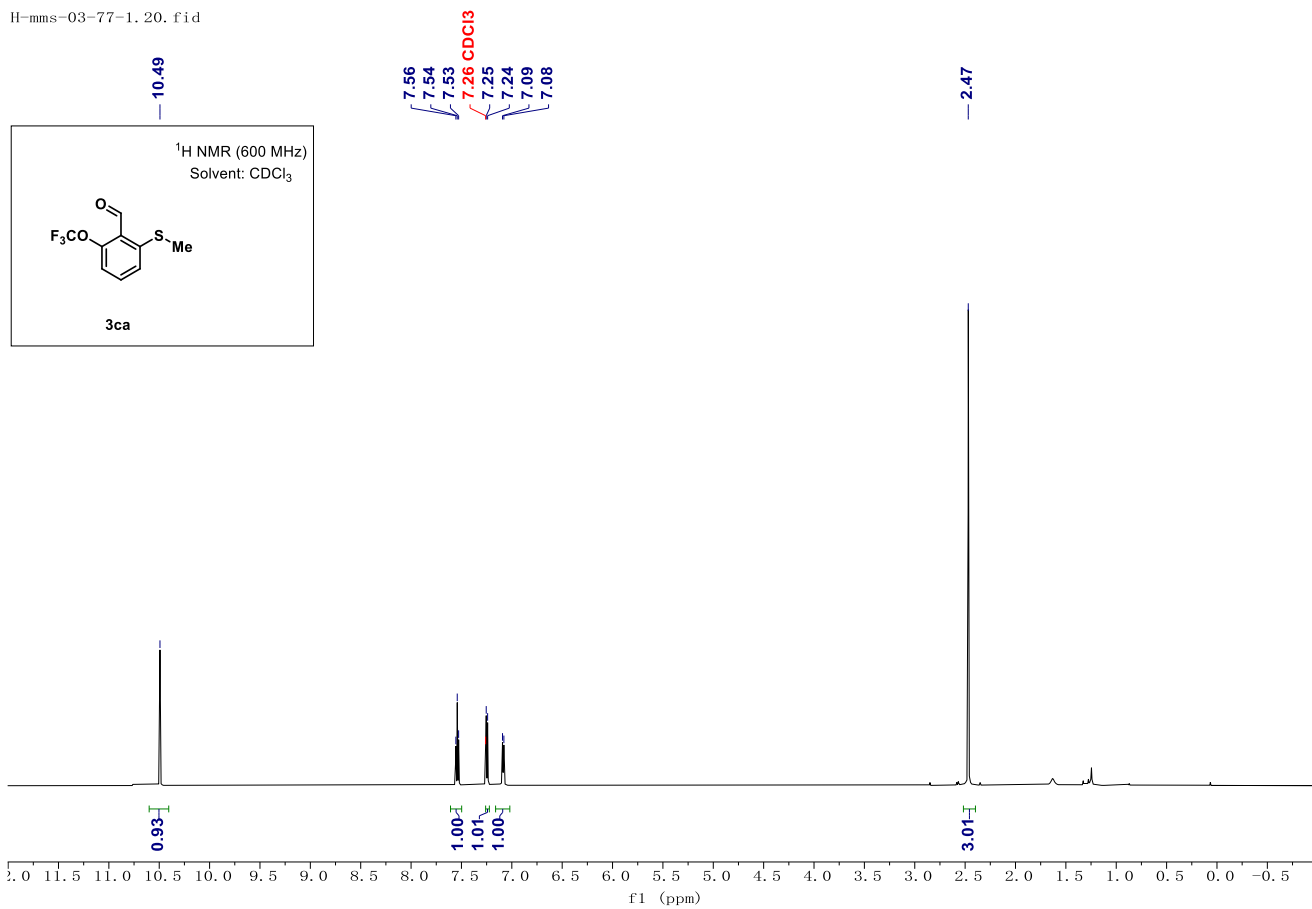

03-77-1.11.fid

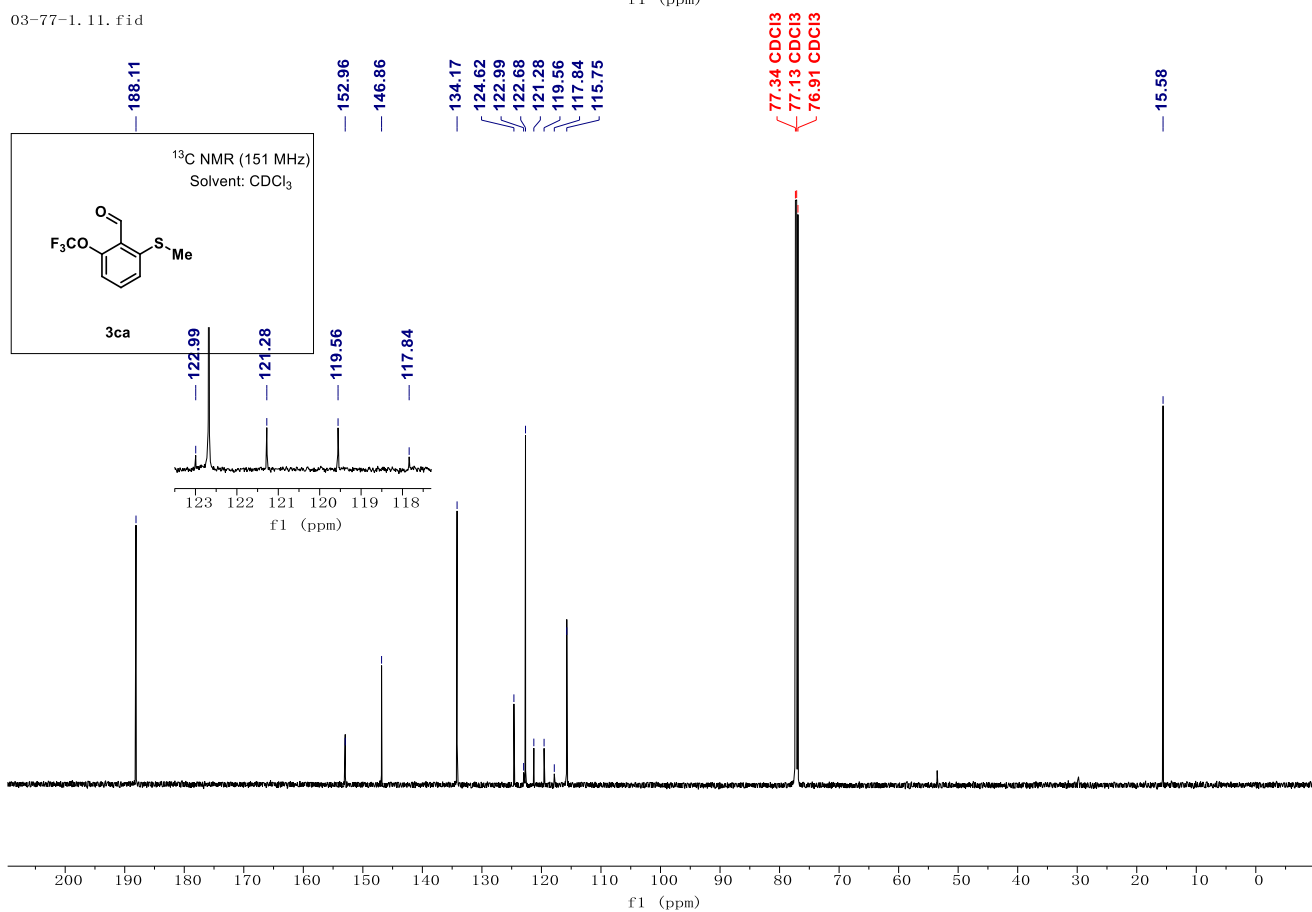

MMS-03-F-20CF3. 10. f1d  
F19CPD CDC13 {D:\Bruker\TOPSPIN\data\data\1hq} 1hq 27

-57.37

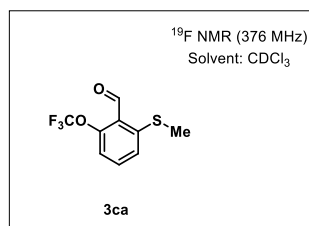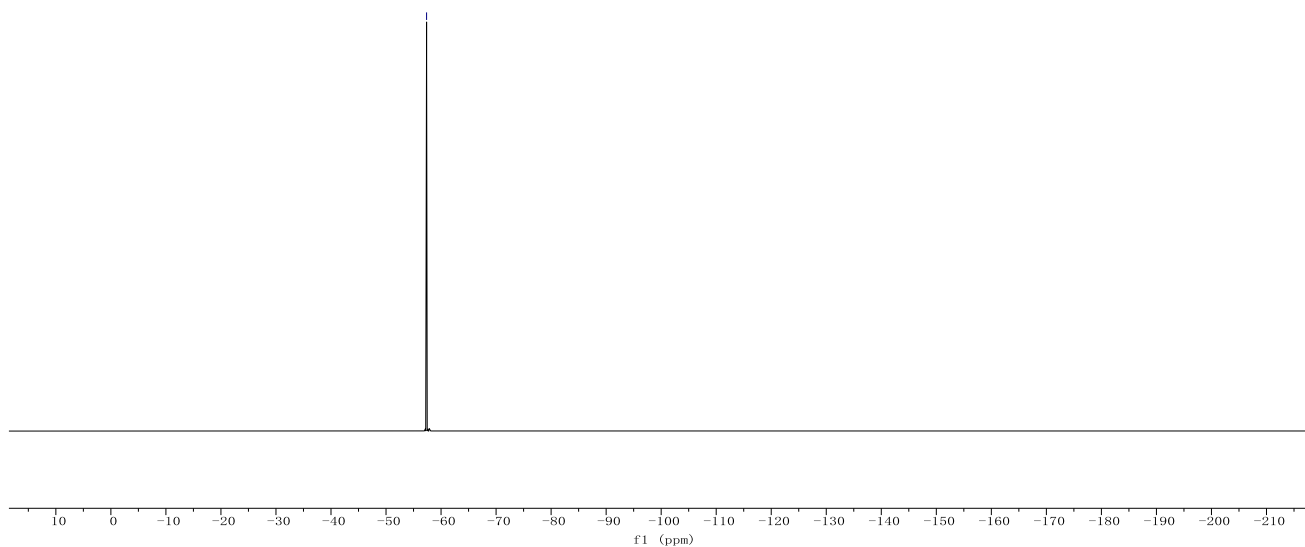

MMS-03-69-2. 10. fid

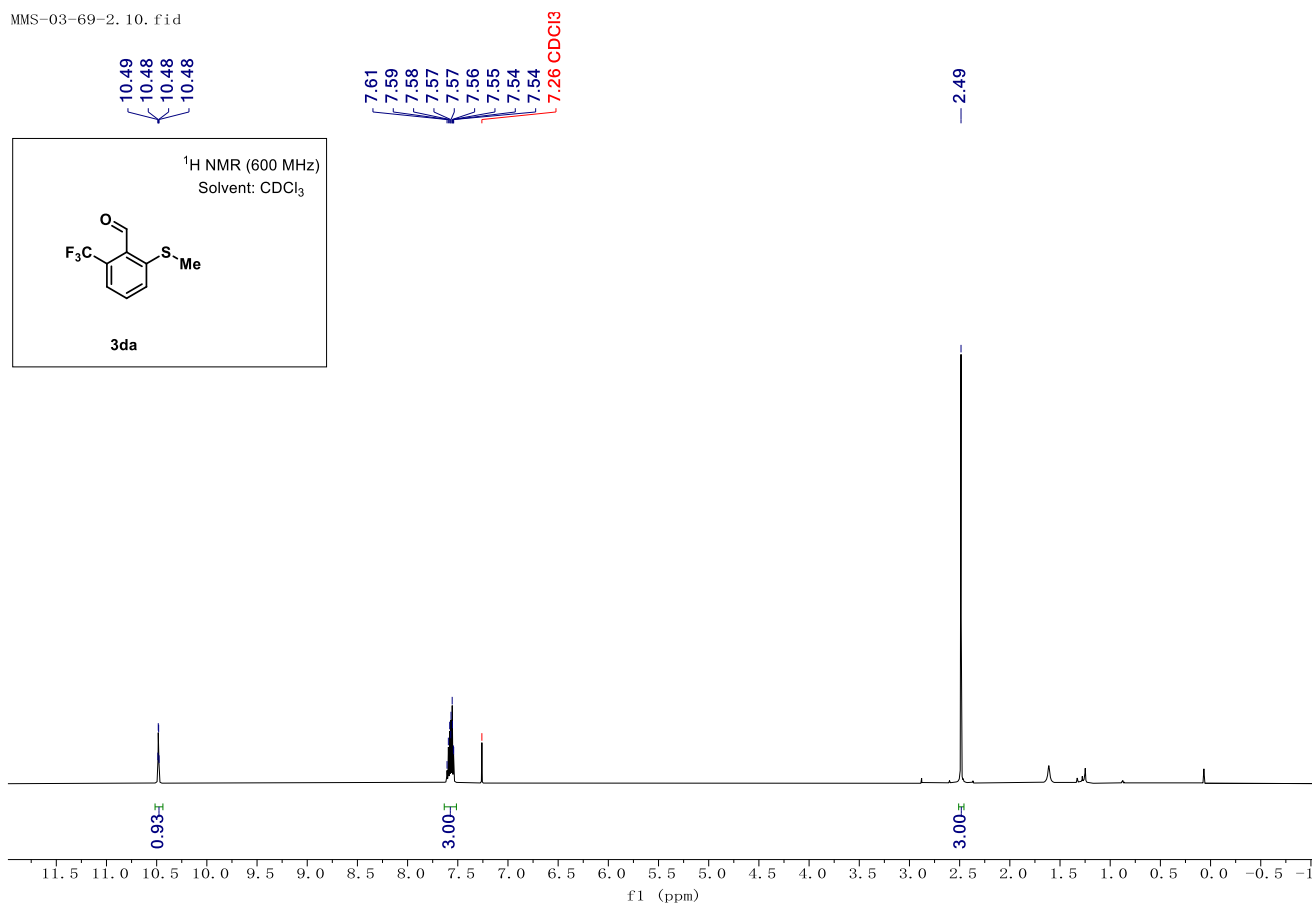

C-MMS-03-69-2. 10. fid

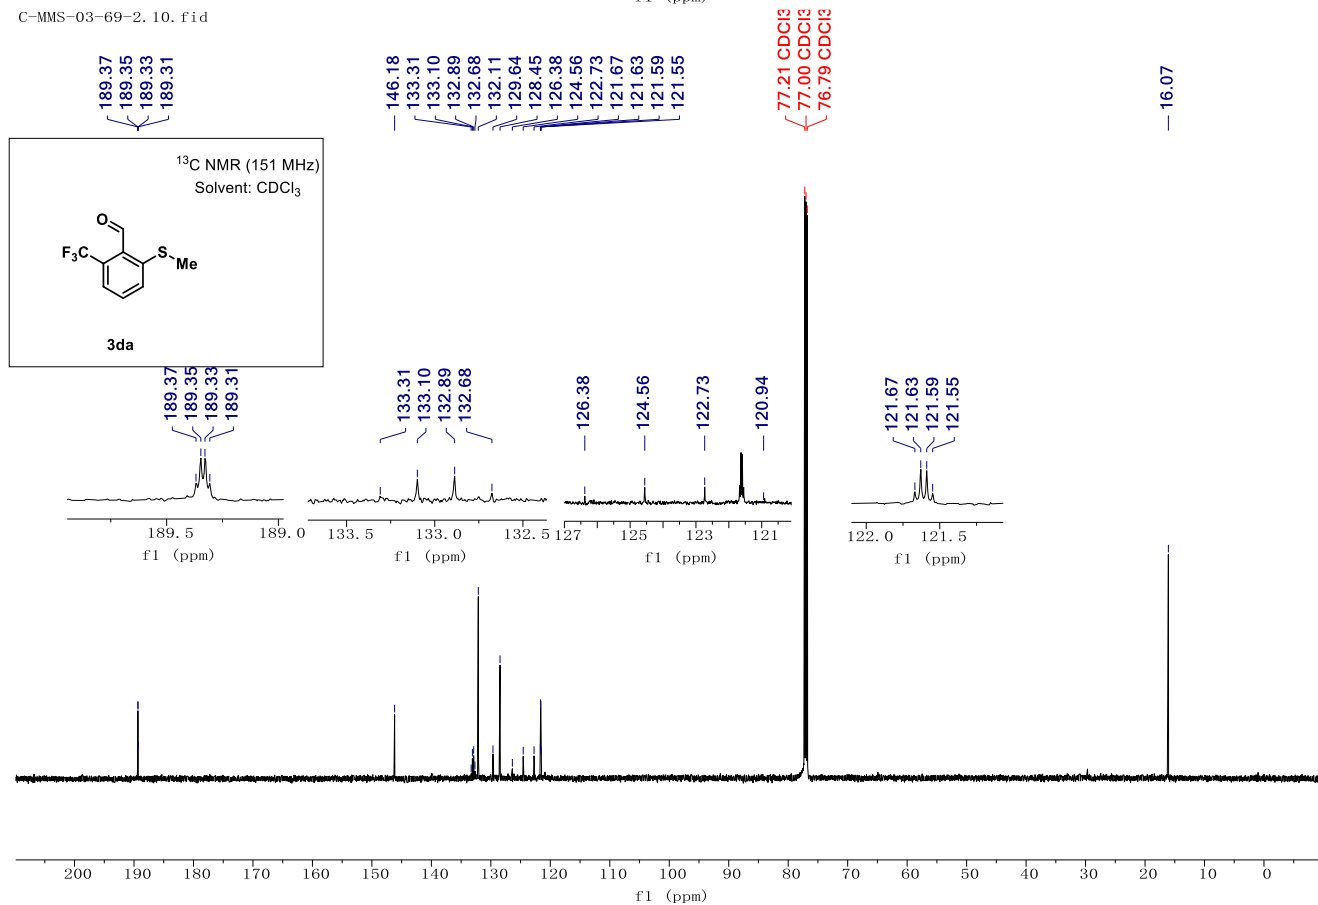

MMS-03-F-2CF3. 10. fid  
F19CPD CDC13 {D:\Bruker\TOPSPIN\data\data\1hq} 1hq 20

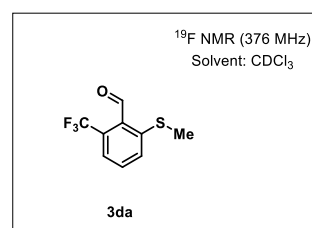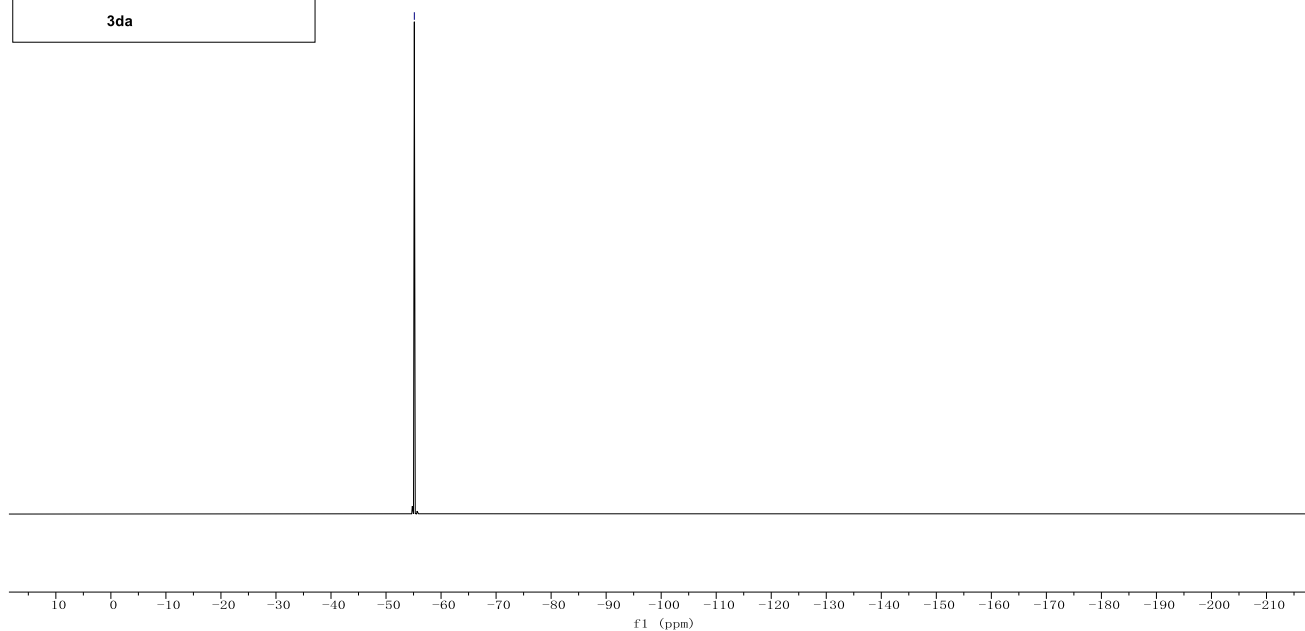

MMS-03-35-1A. 10. fid

PROTON CDC13 {D:\Bruker\TOPSPIN\data\data\lhq} lhq 59

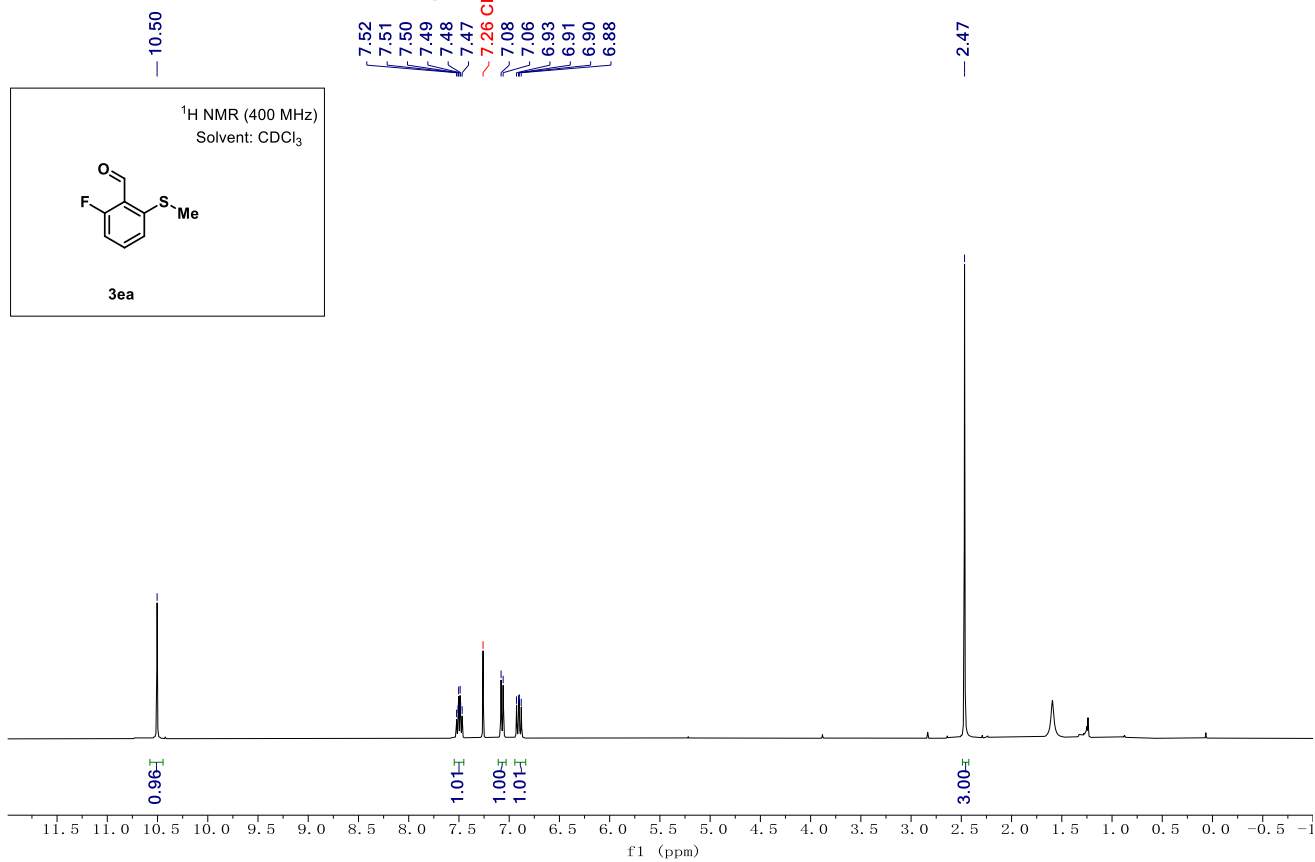

MMS-03-35-1A. 12. fid

C13CPD CDC13 {D:\Bruker\TOPSPIN\data\data\lhq} lhq 59

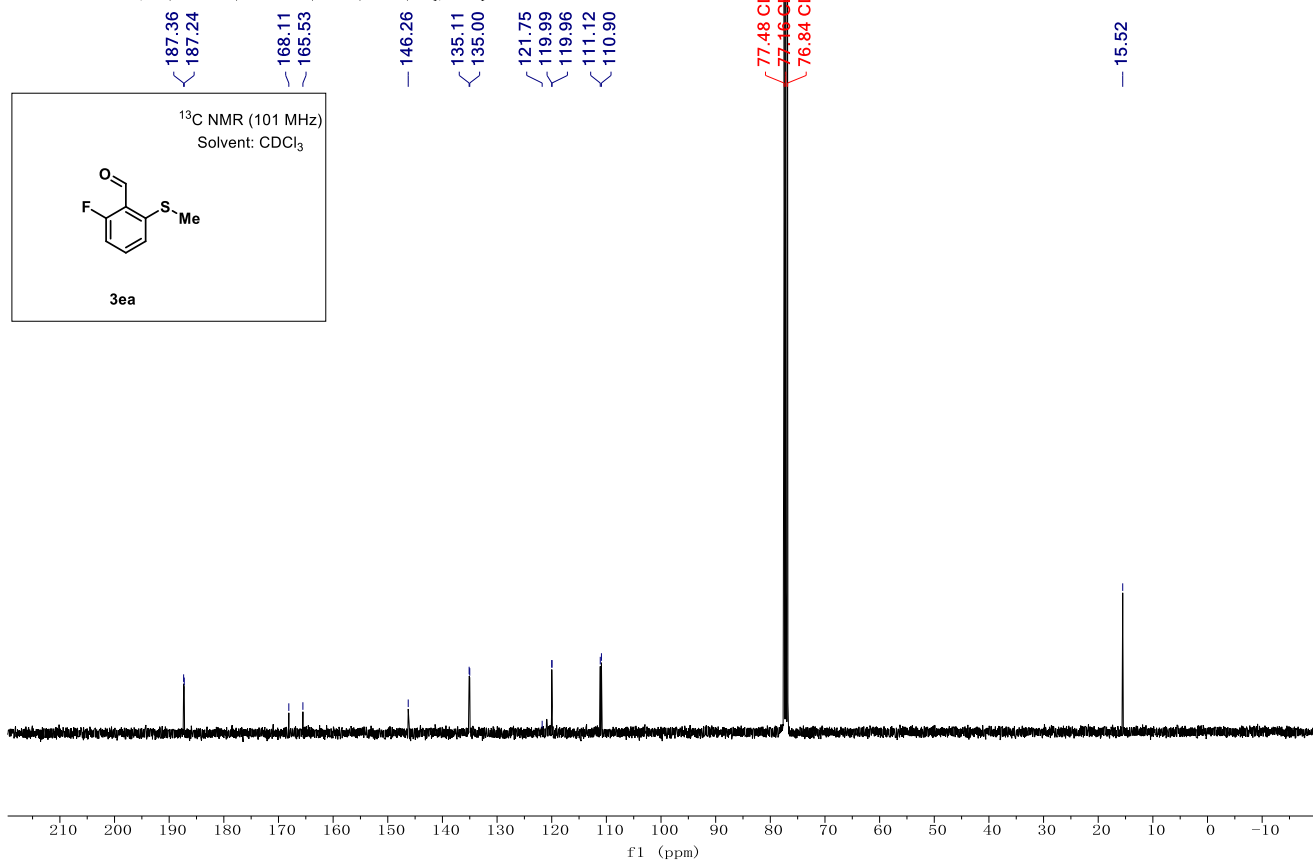

MMS-03-35-1A. 11. fid  
F19CPD CDC13 {D:\Bruker\TOPSPIN\data\data\lhq} lhq 59

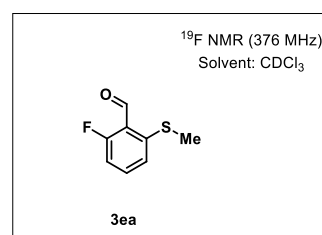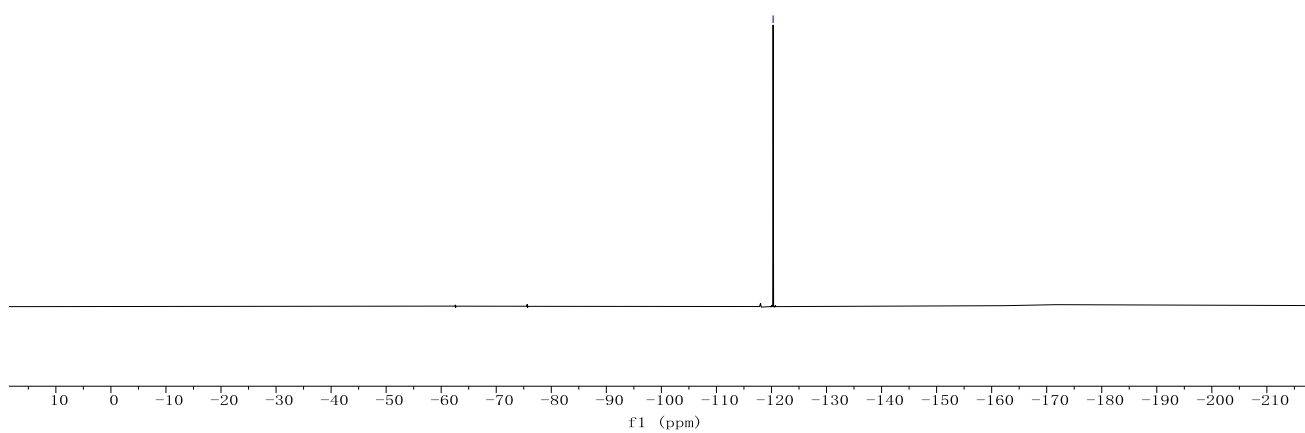

mms-03-70-7, 10, fid

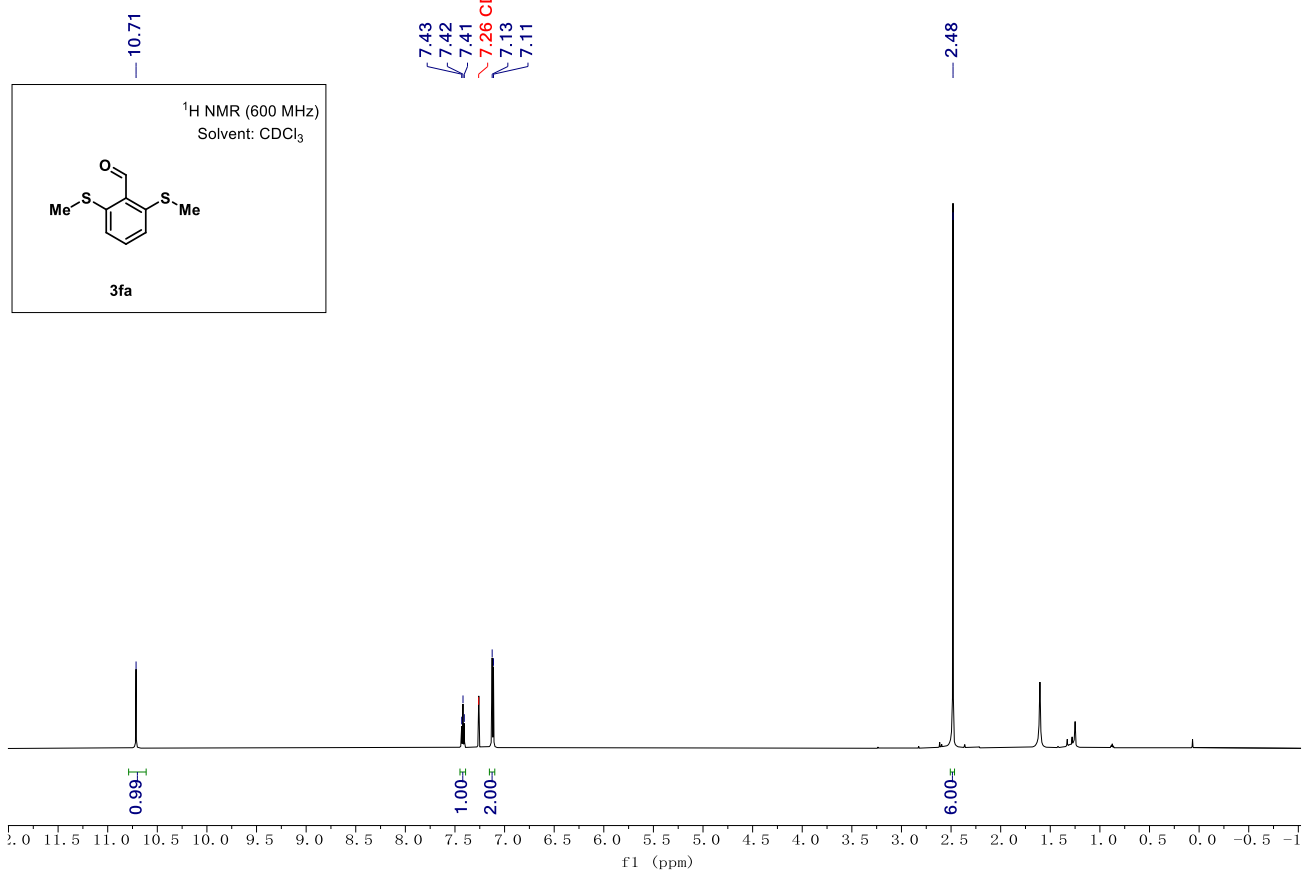

c-mms-03-70-7, 10, fid

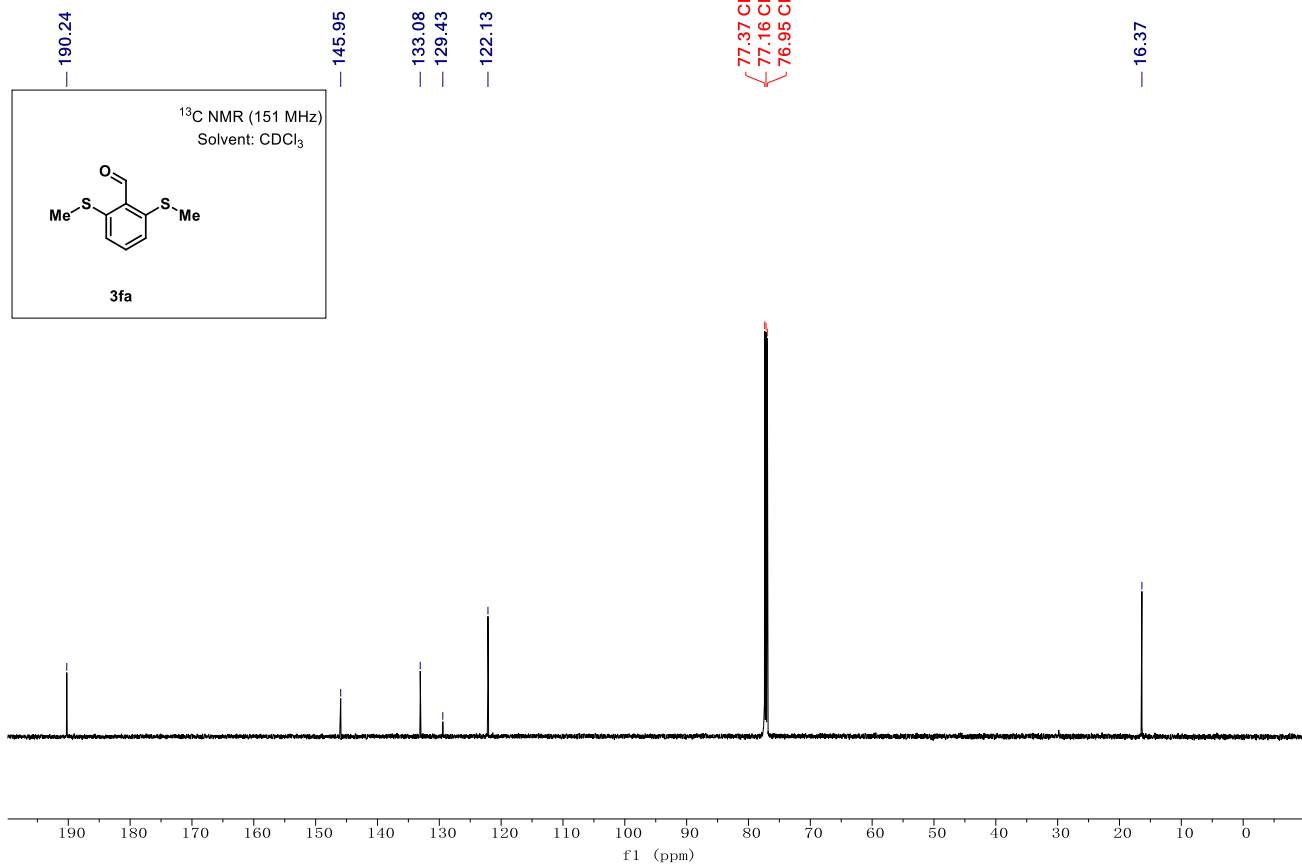

mms-03-73-7-1.10.fid

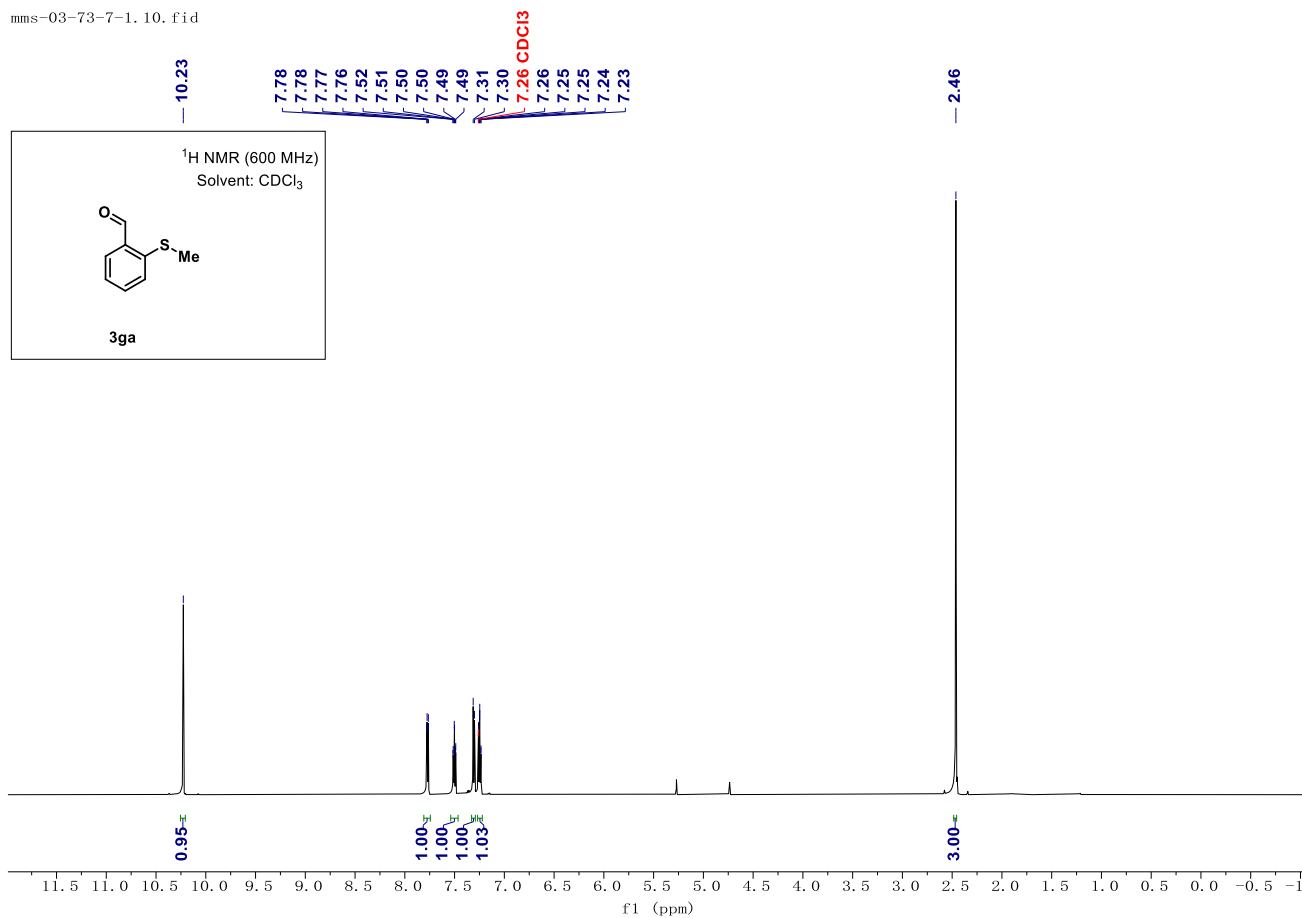

mms-03-73-7-1.11.fid

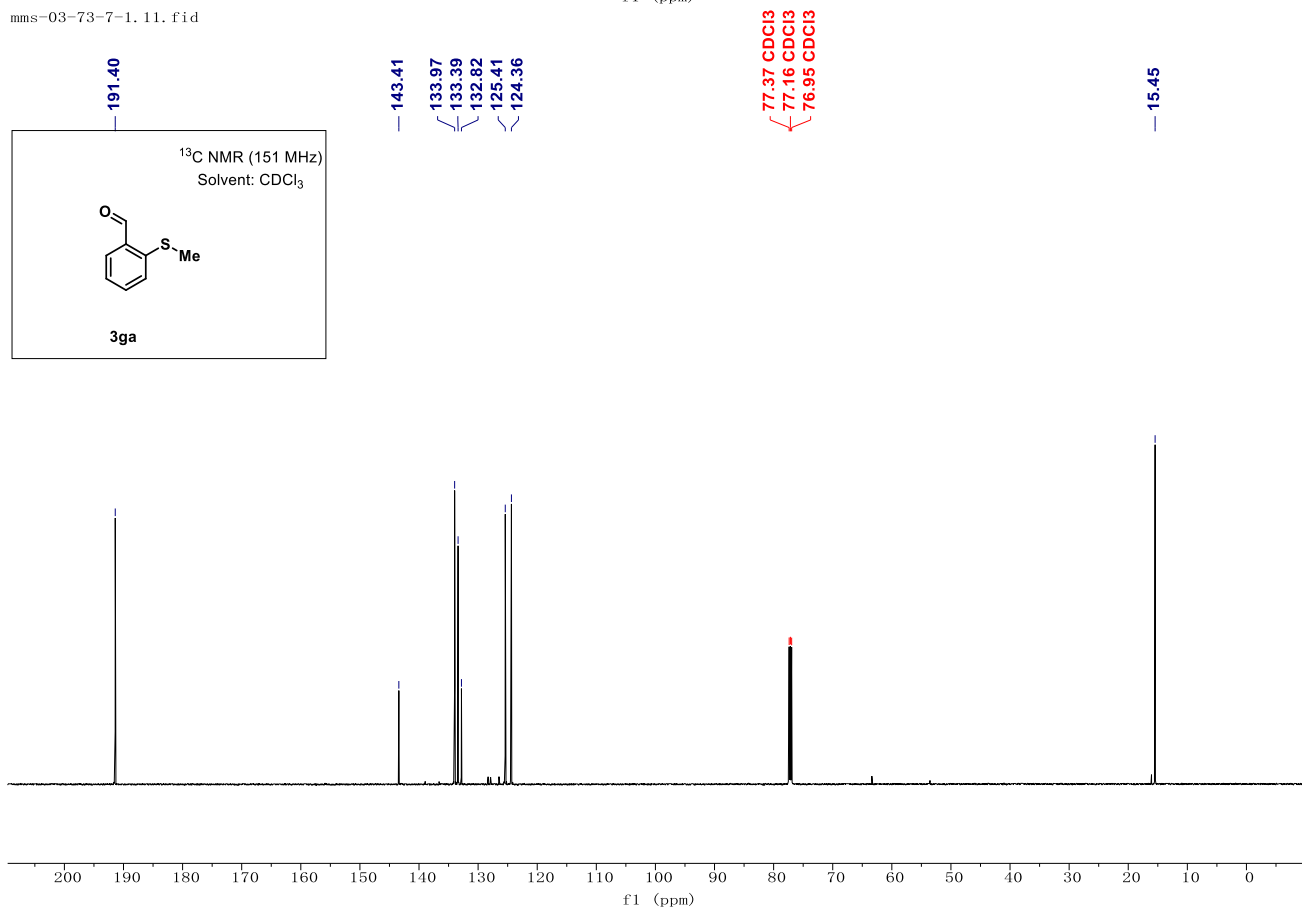



MMS-03-69-4. 10. fid

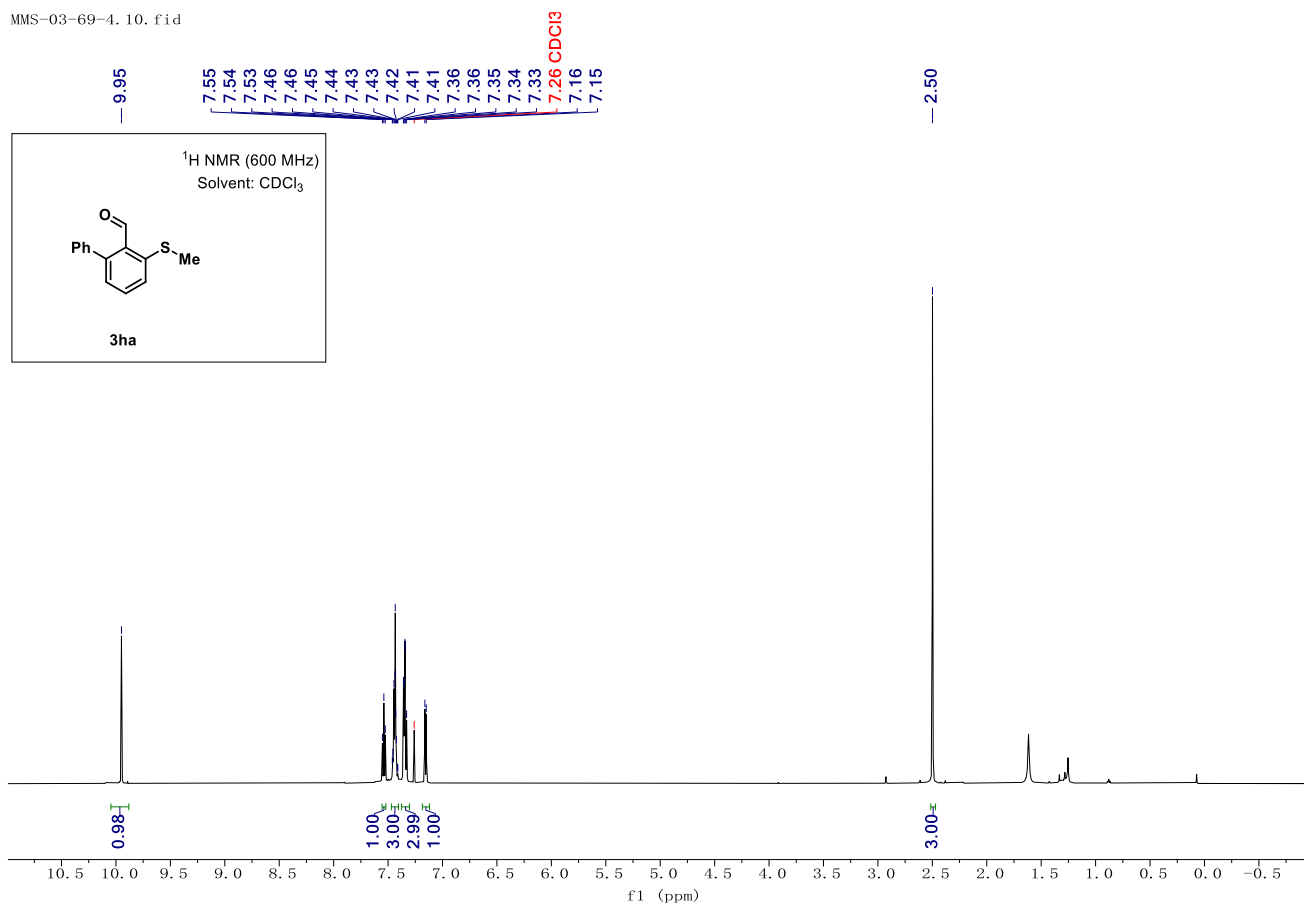

C-MMS-03-69-4. 10. fid

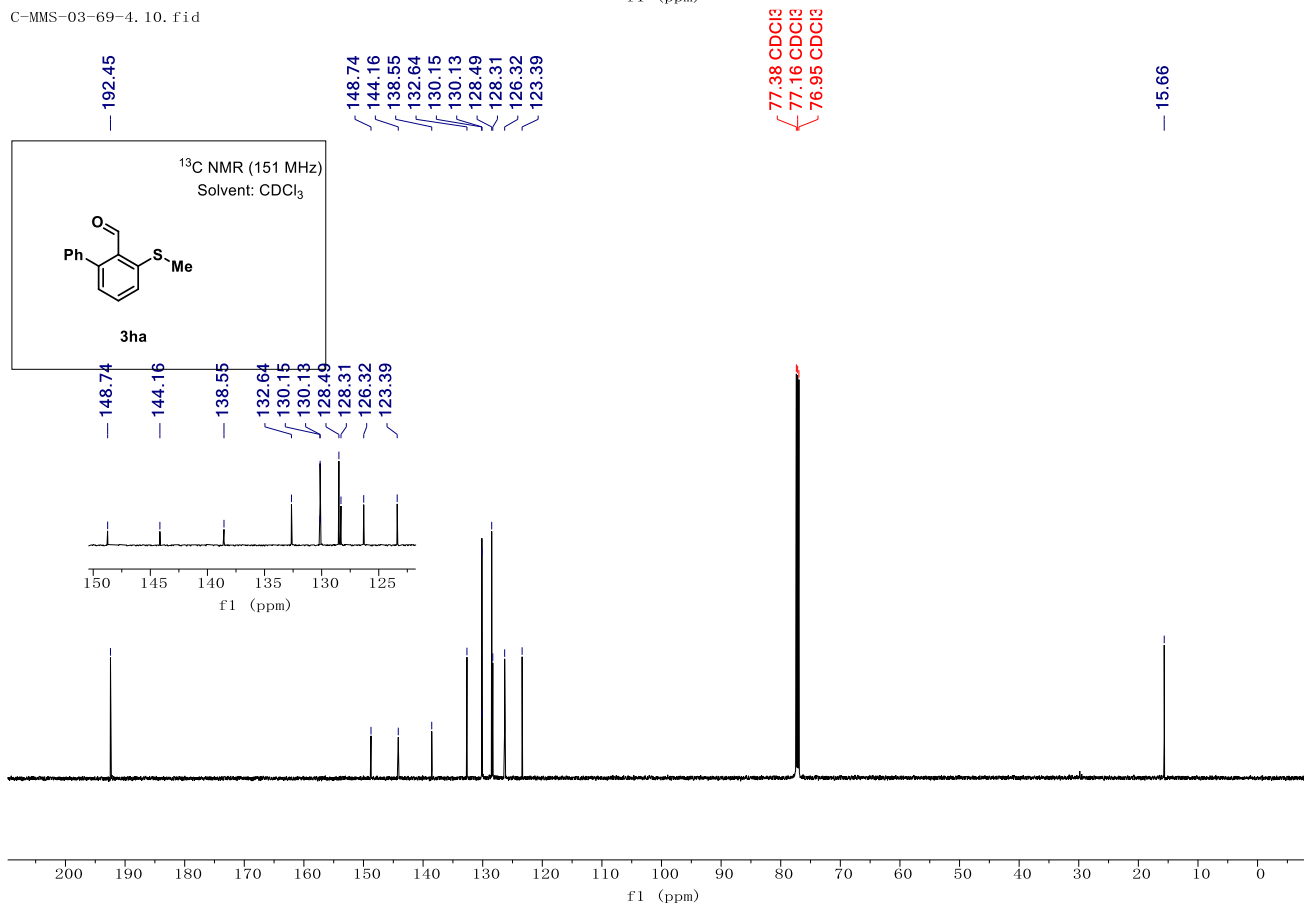

H-mms-03-77-2. 20. f1

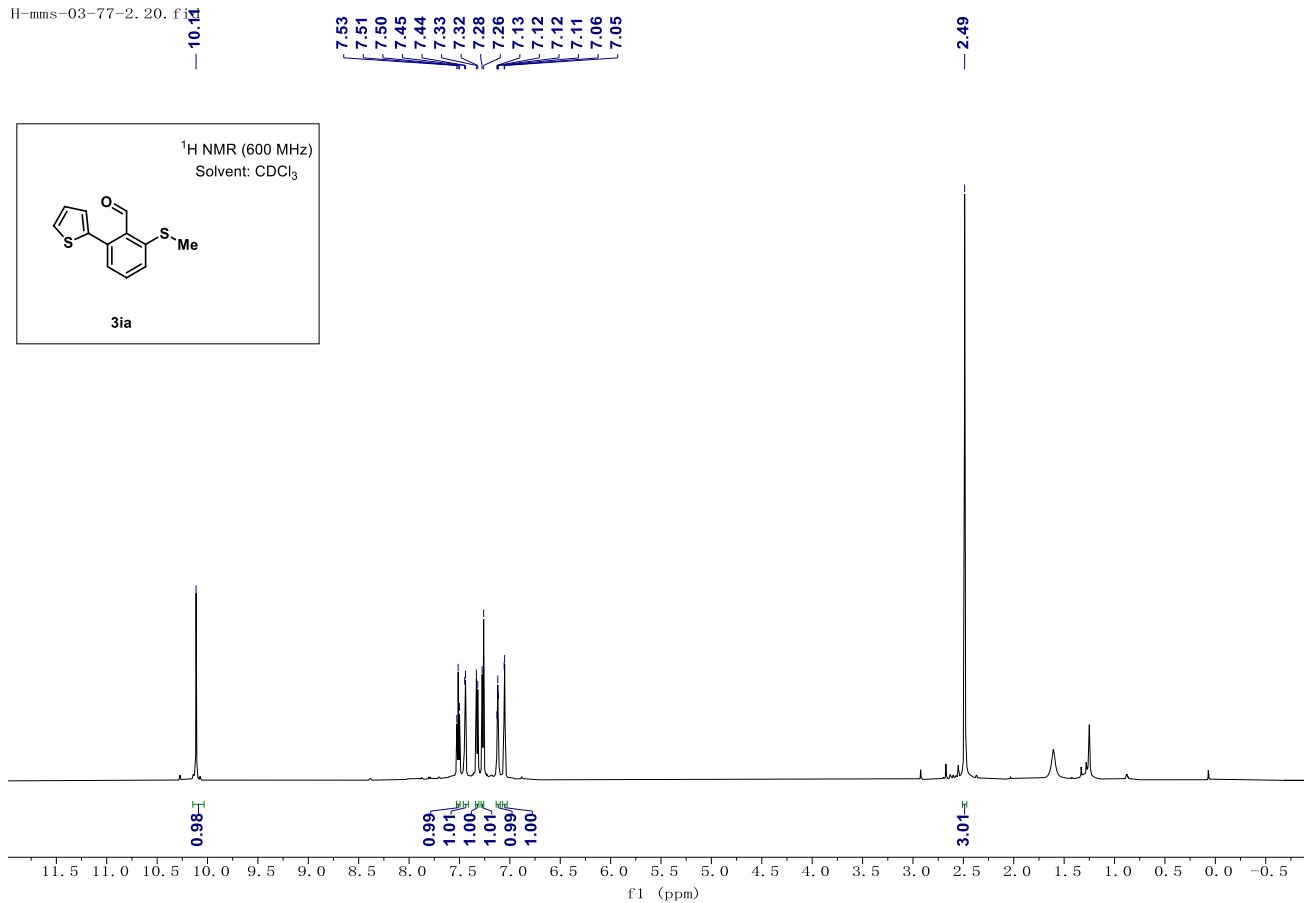

03-77-2. 11. f1d

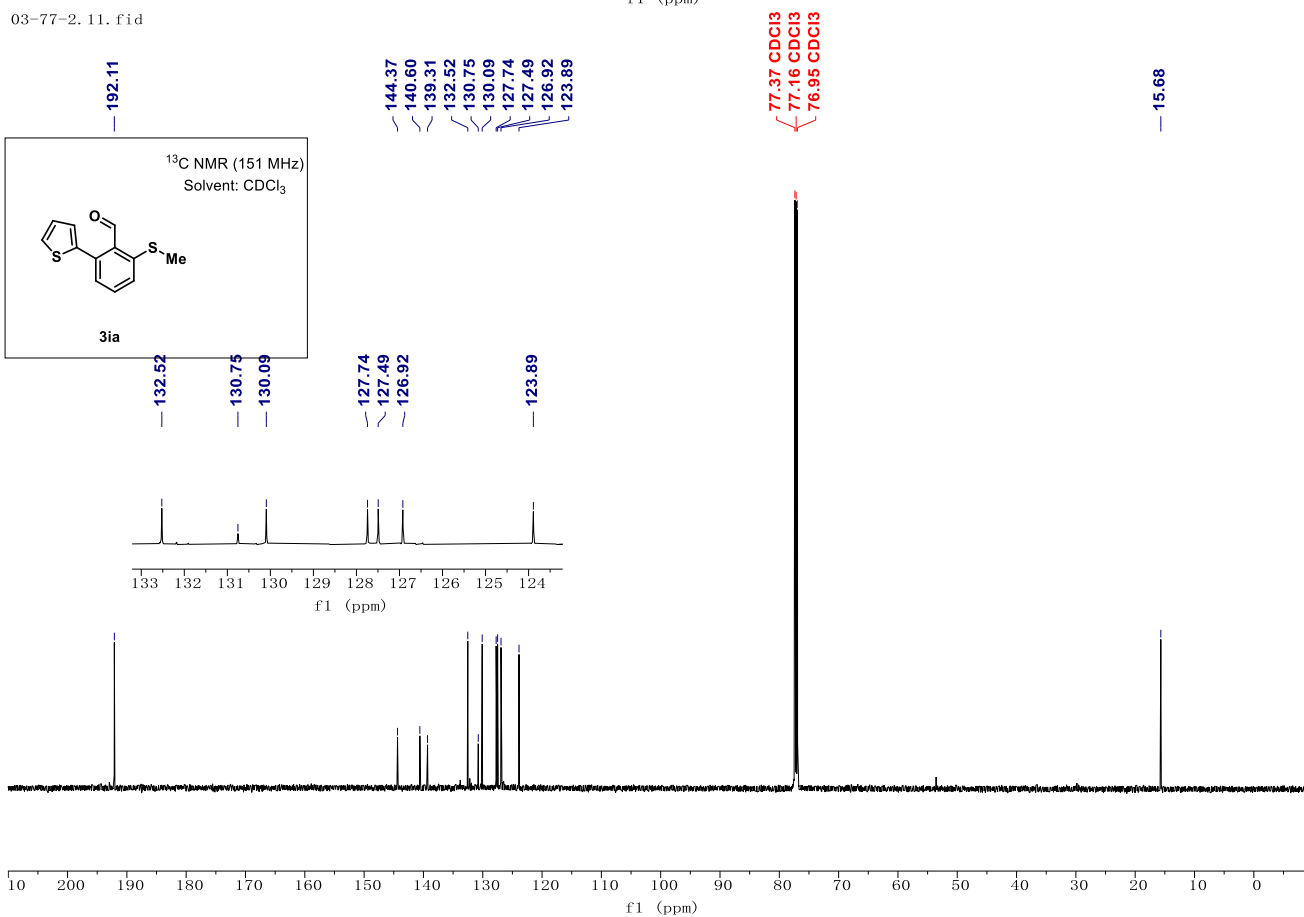

mms-03-70-1-1a.10.fid

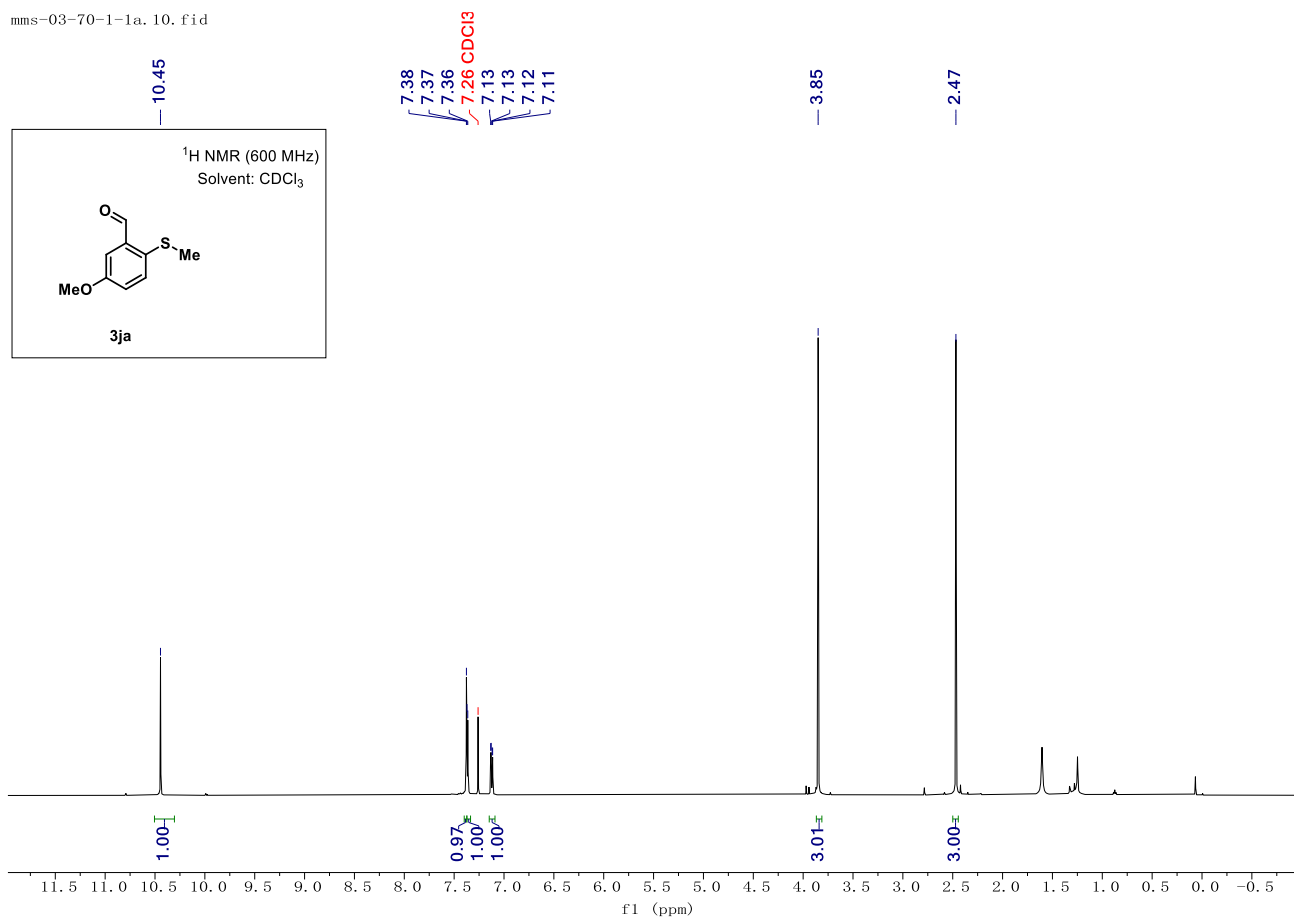

c-mms-03-70-1-1a.10.fid

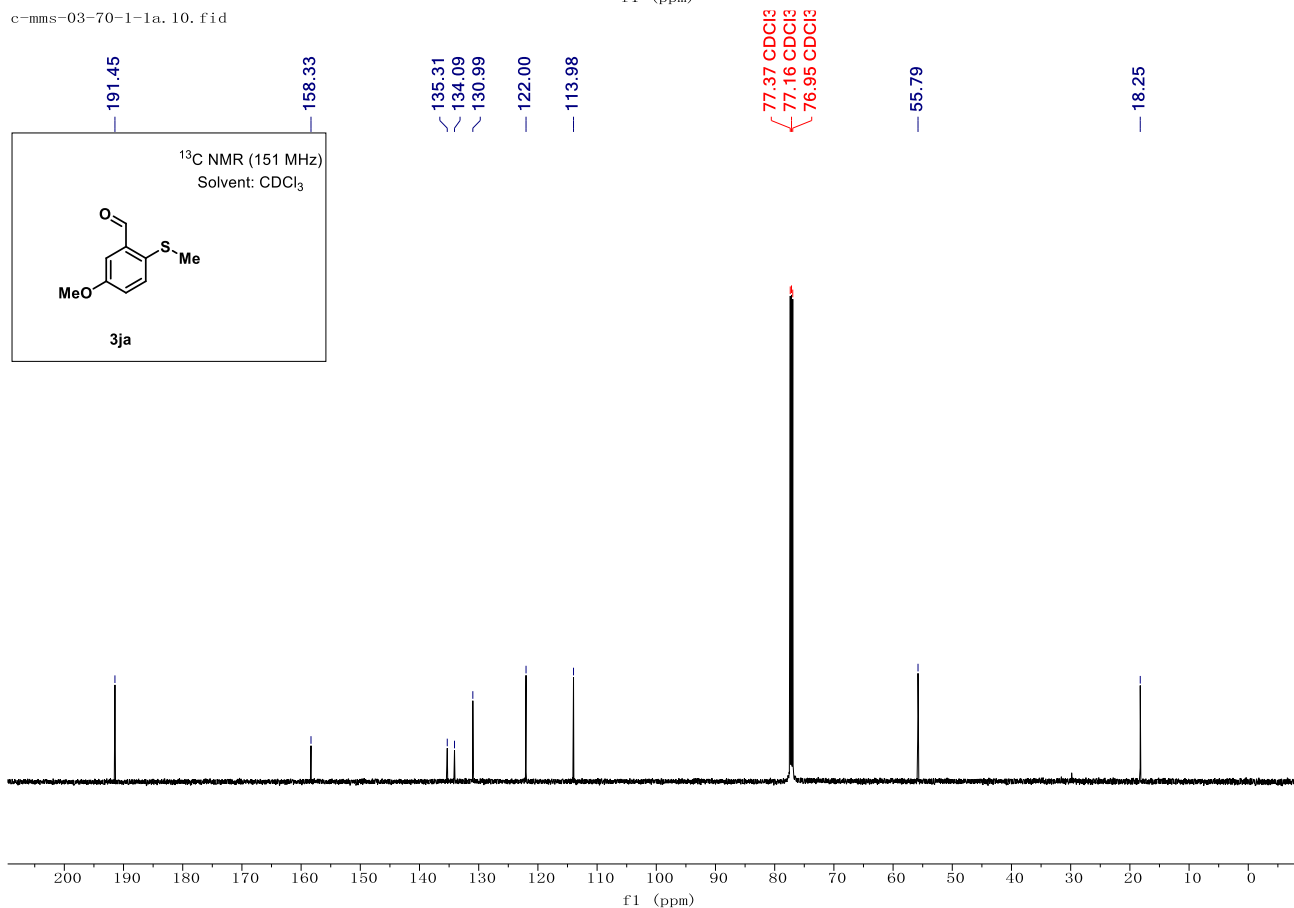

MMS-03-70-1-2. 10. fid

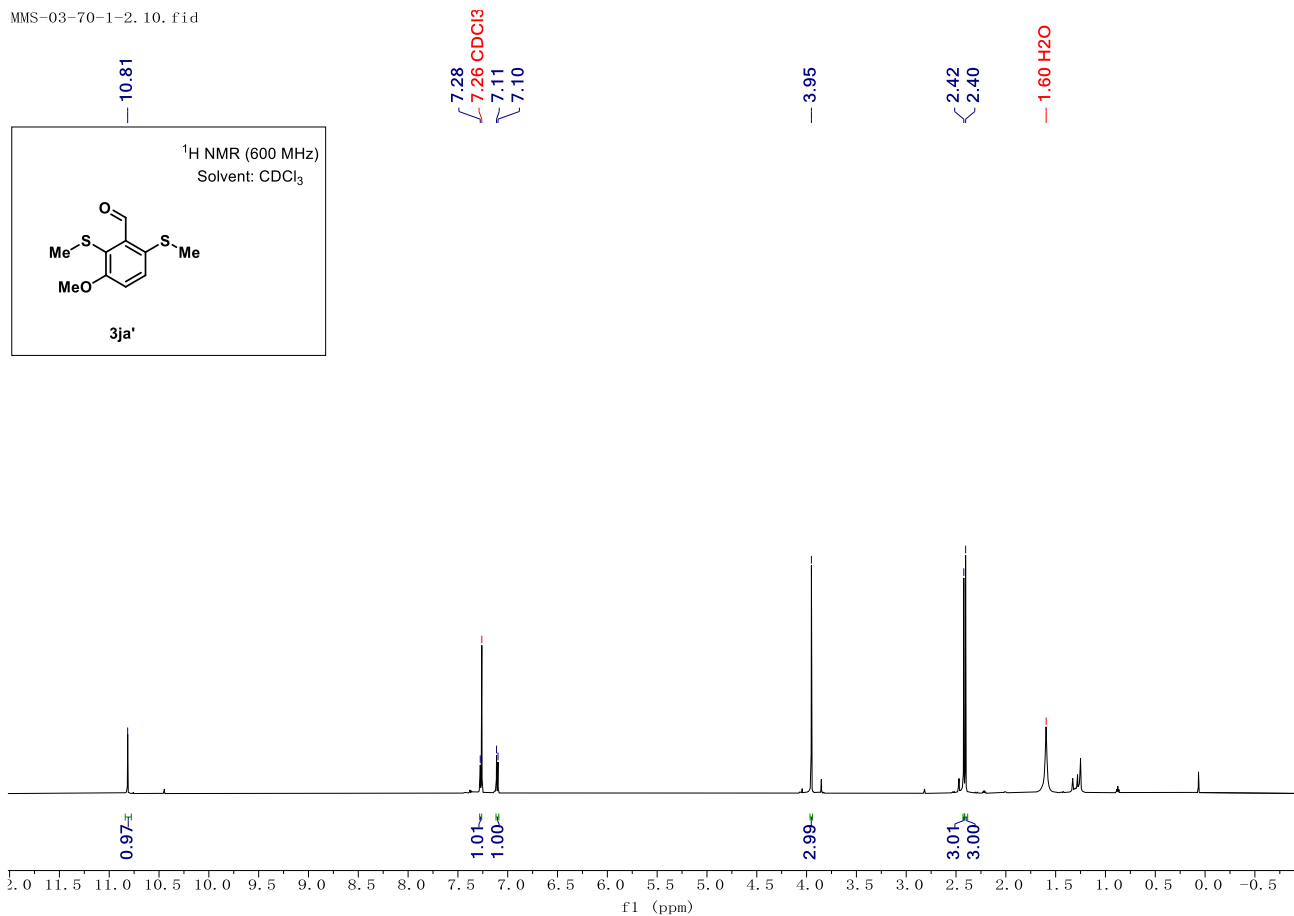

C-MMS-03-70-1-2. 10. fid

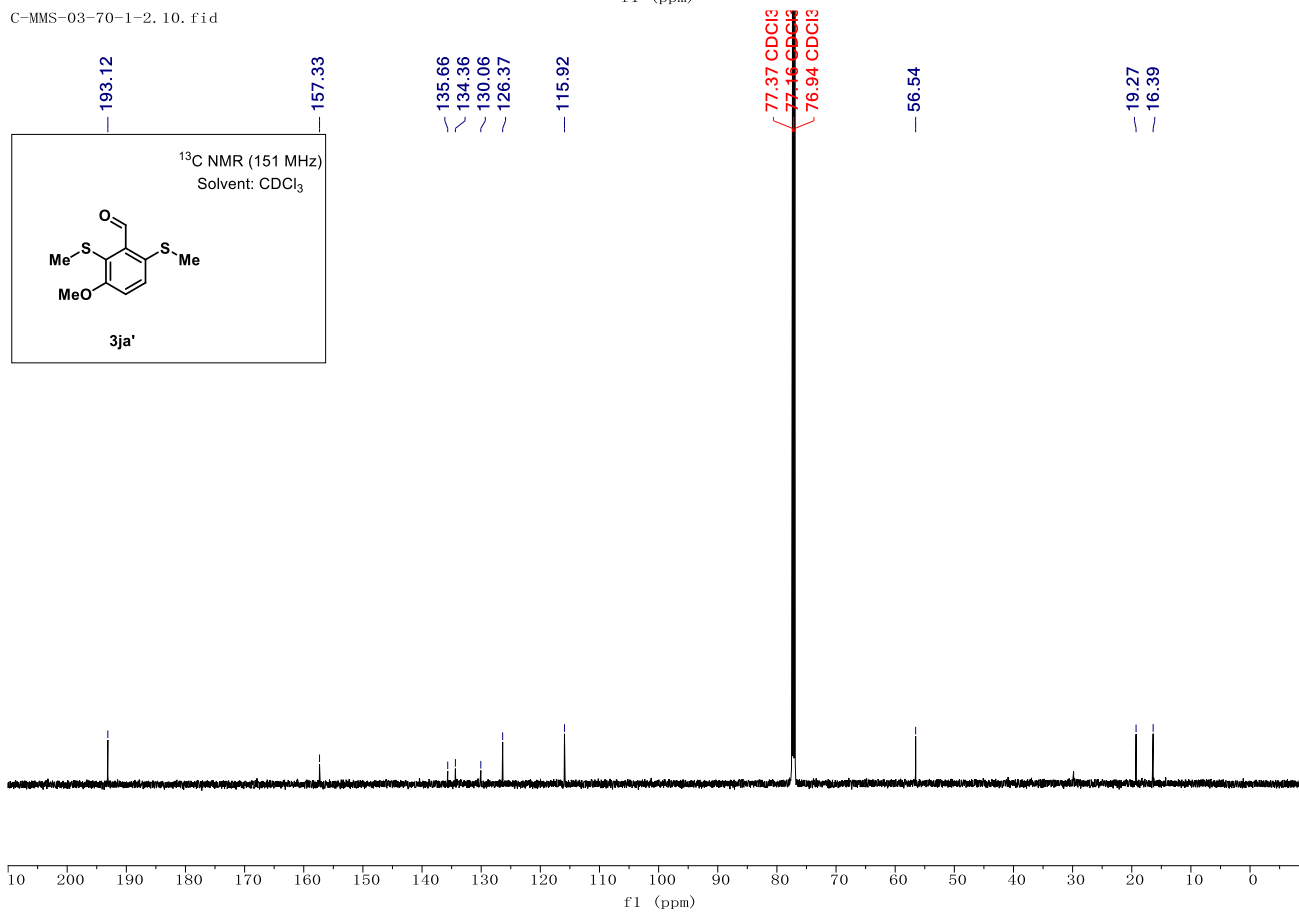

MMS-03-163-1A.10.fid  
 PROTON CDCl<sub>3</sub> {D:\Bruker\TOPSPIN\data\data\lhq}

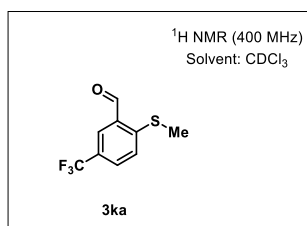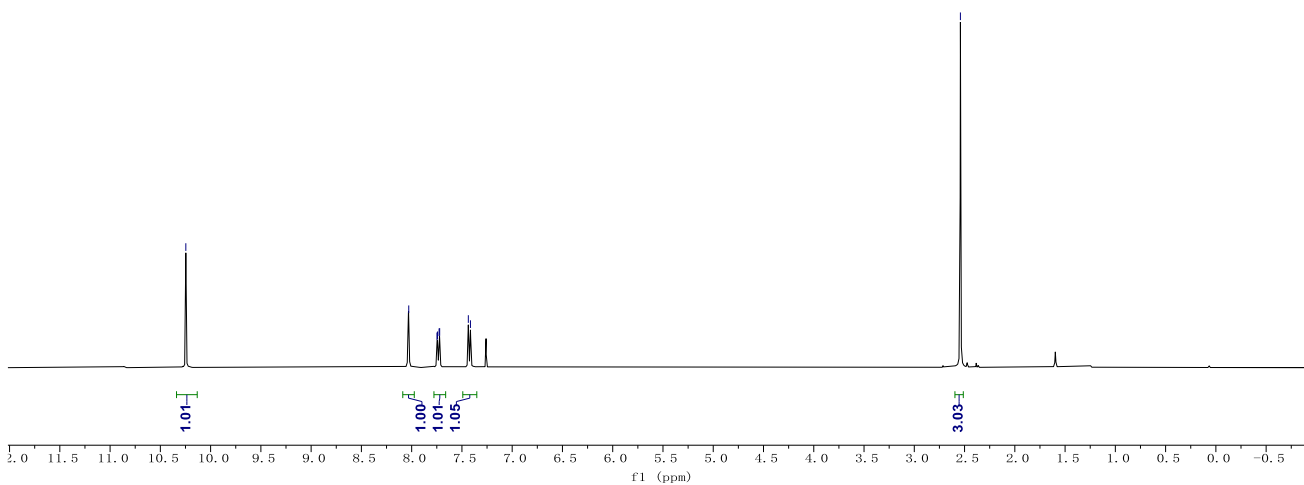

MMS-03-163-1A.20.fid  
 C13CPD CDCl<sub>3</sub> {D:\Bruker\TOPSPIN\data\data\lhq} lhq 33

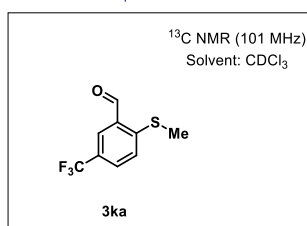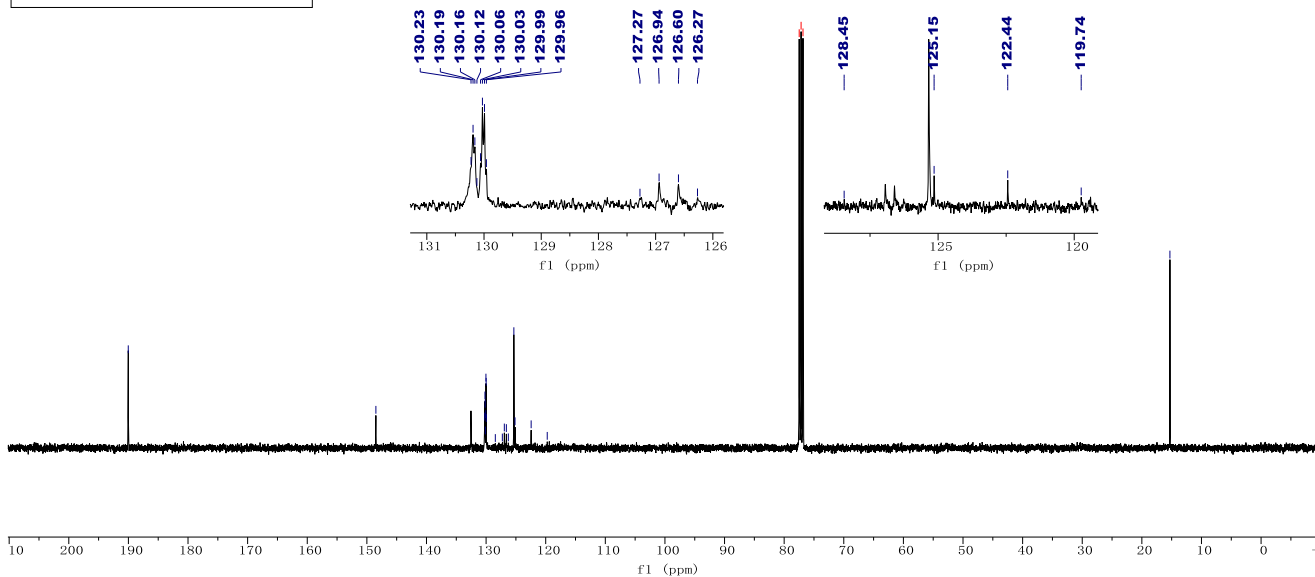

MMS-03-163-1A.11.fid  
F19CPD CDC13 {D:\Bruker\TOPSPIN\data\data\1hq} 1hq 5

-62.56

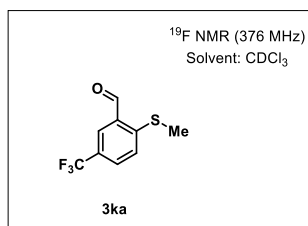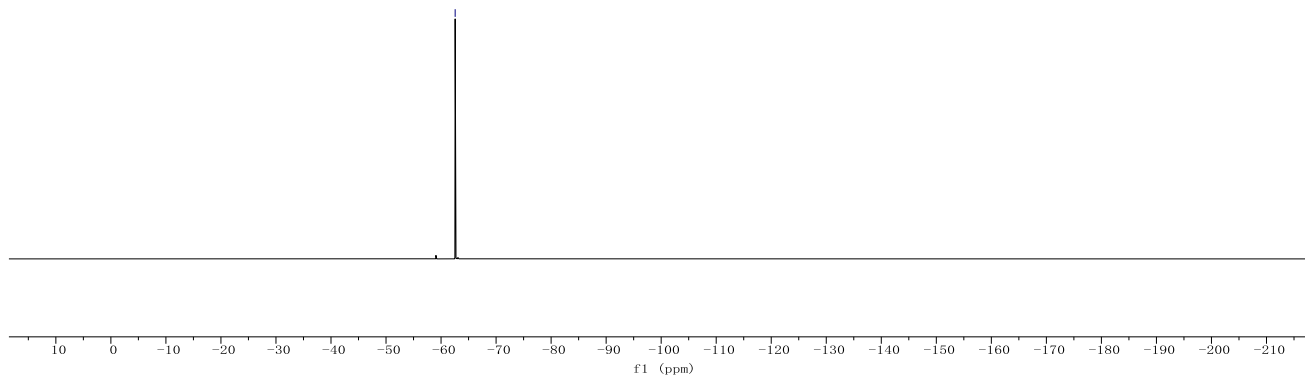

MMS-03-163-8-1.10.fid  
 PROTON CDC13 {D:\Bruker\TOPSPIN\data\data\lhq} lhq 2

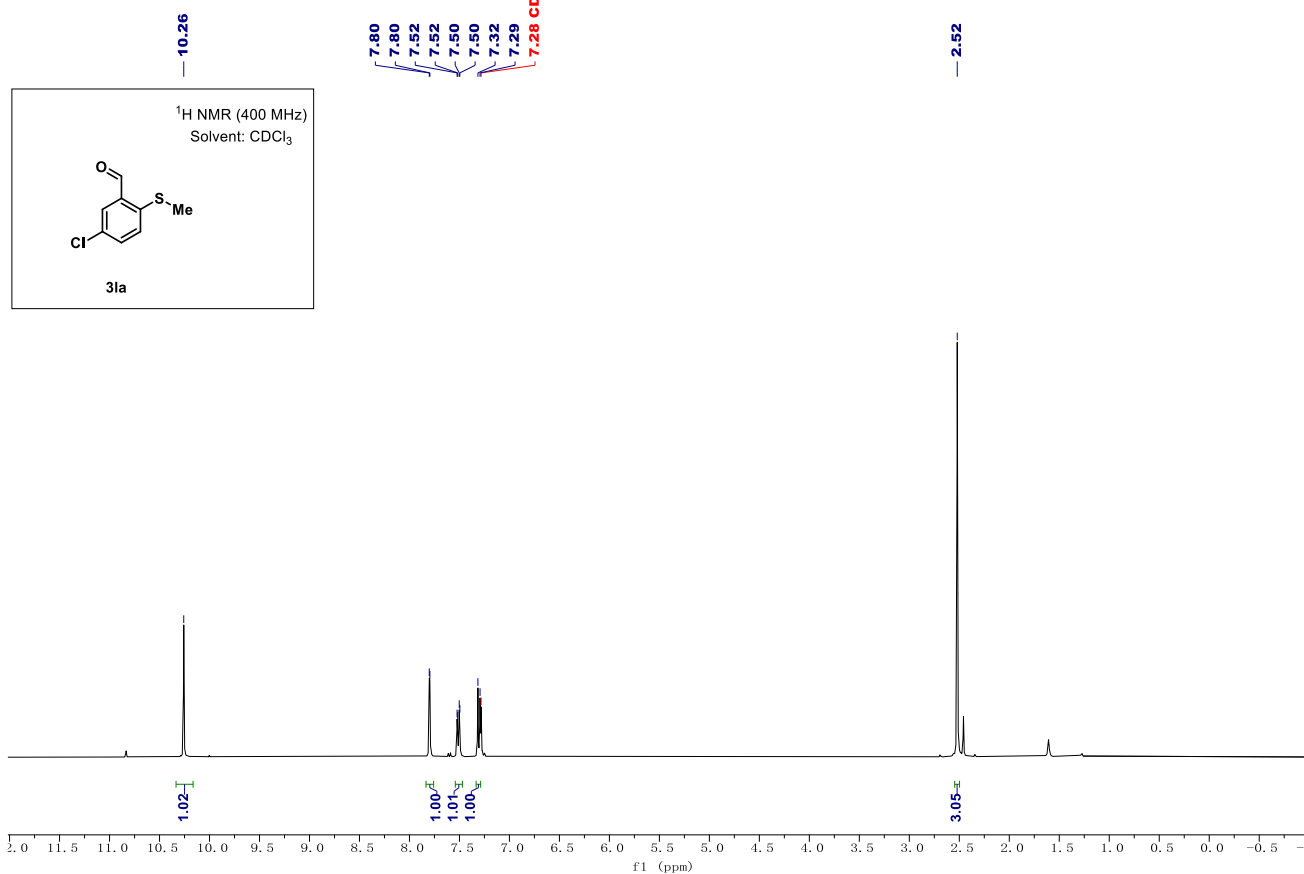

MMS-03-163-8-1.11.fid  
 C13CPD CDC13 {D:\Bruker\TOPSPIN\data\data\lhq} lhq 2

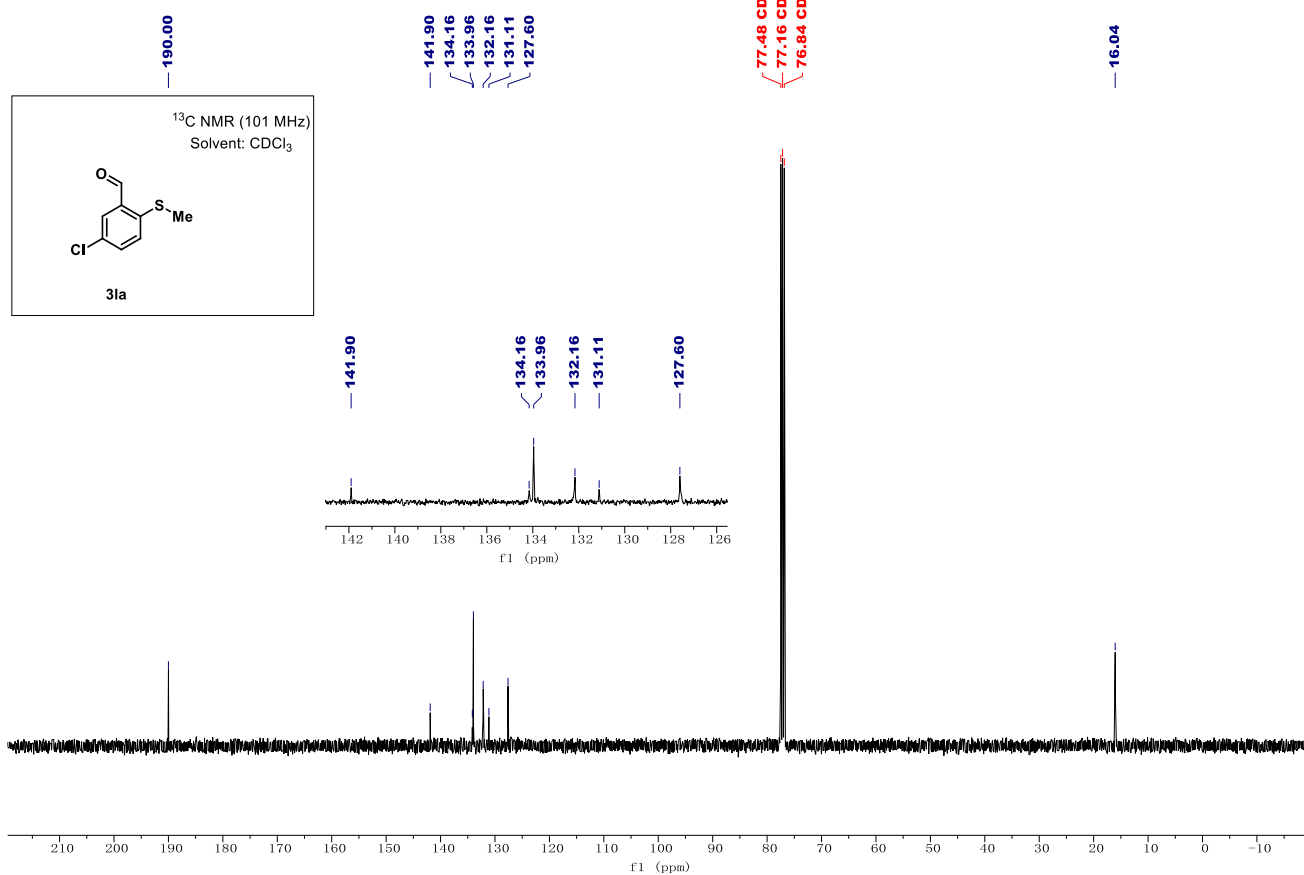

MMS-03-163-8-2.10.fid  
 PROTON CDCl3 (D:\Bruker\TOPSPIN\data\data\lhq) 1hq 3

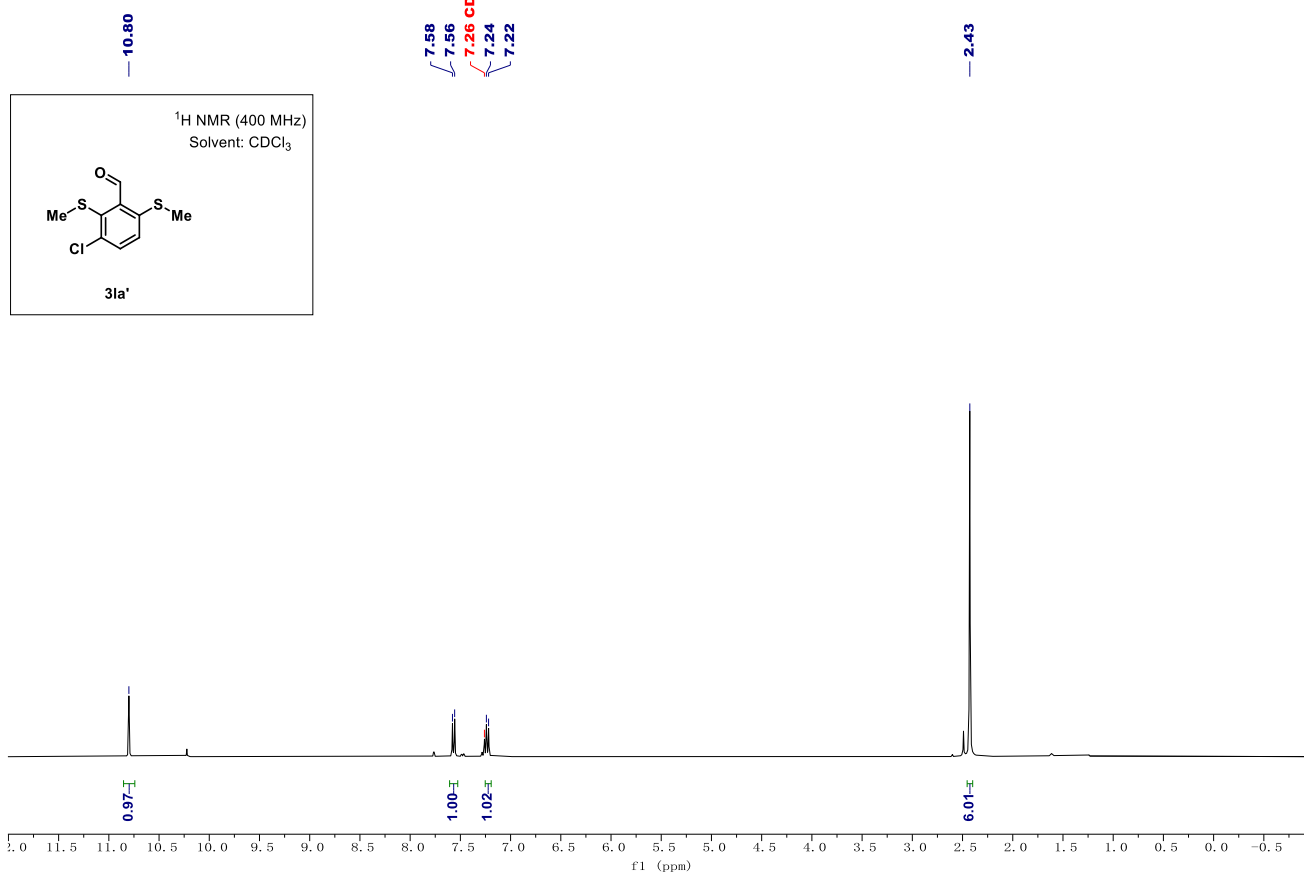

MMS-03-163-8-2.11.fid  
 C13CPD CDCl3 (D:\Bruker\TOPSPIN\data\data\lhq) 1hq 3

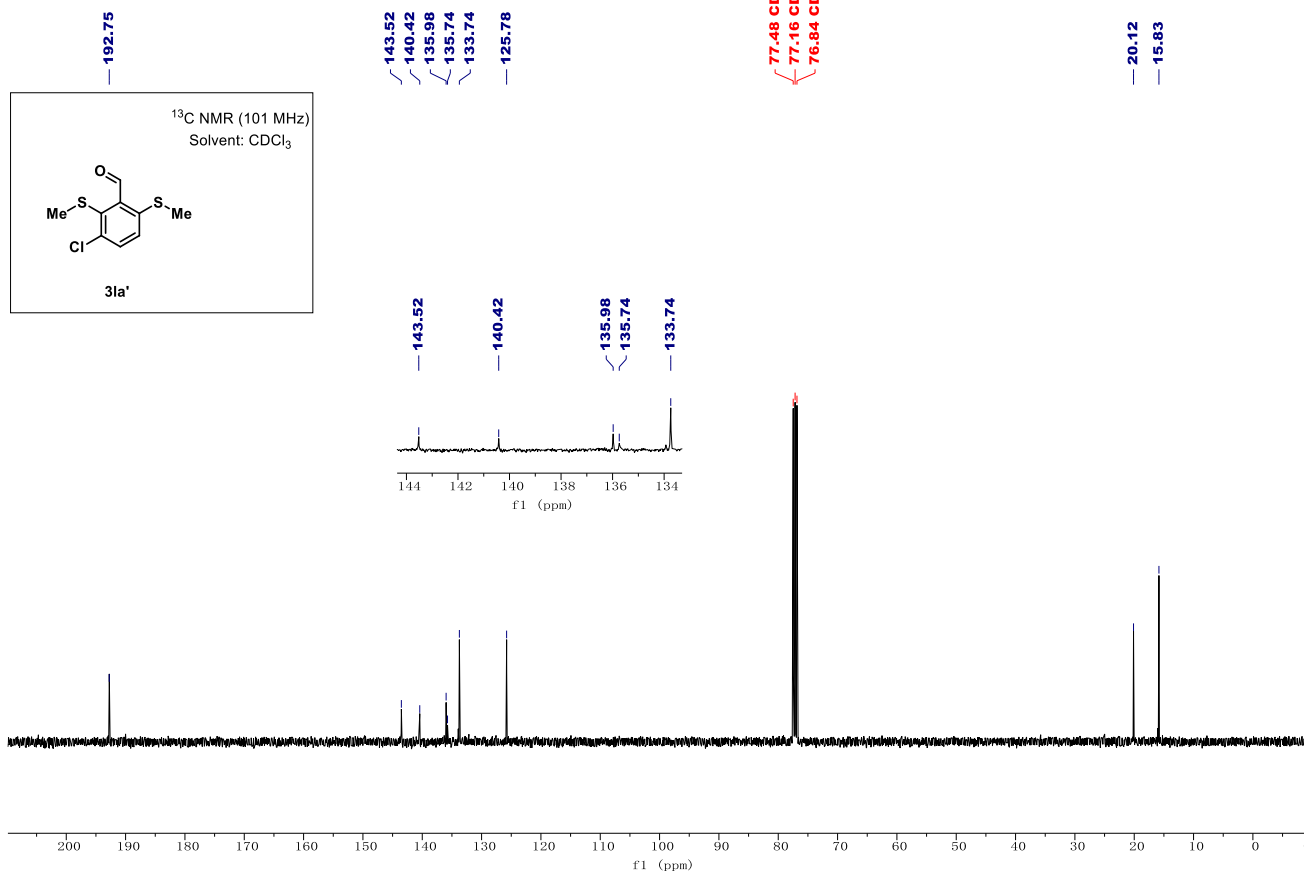



MMS-03-163-6. 10. fid  
 PROTON CDCl3 {D:\Bruker\TOPSPIN\data\data\lhq} lhq 1

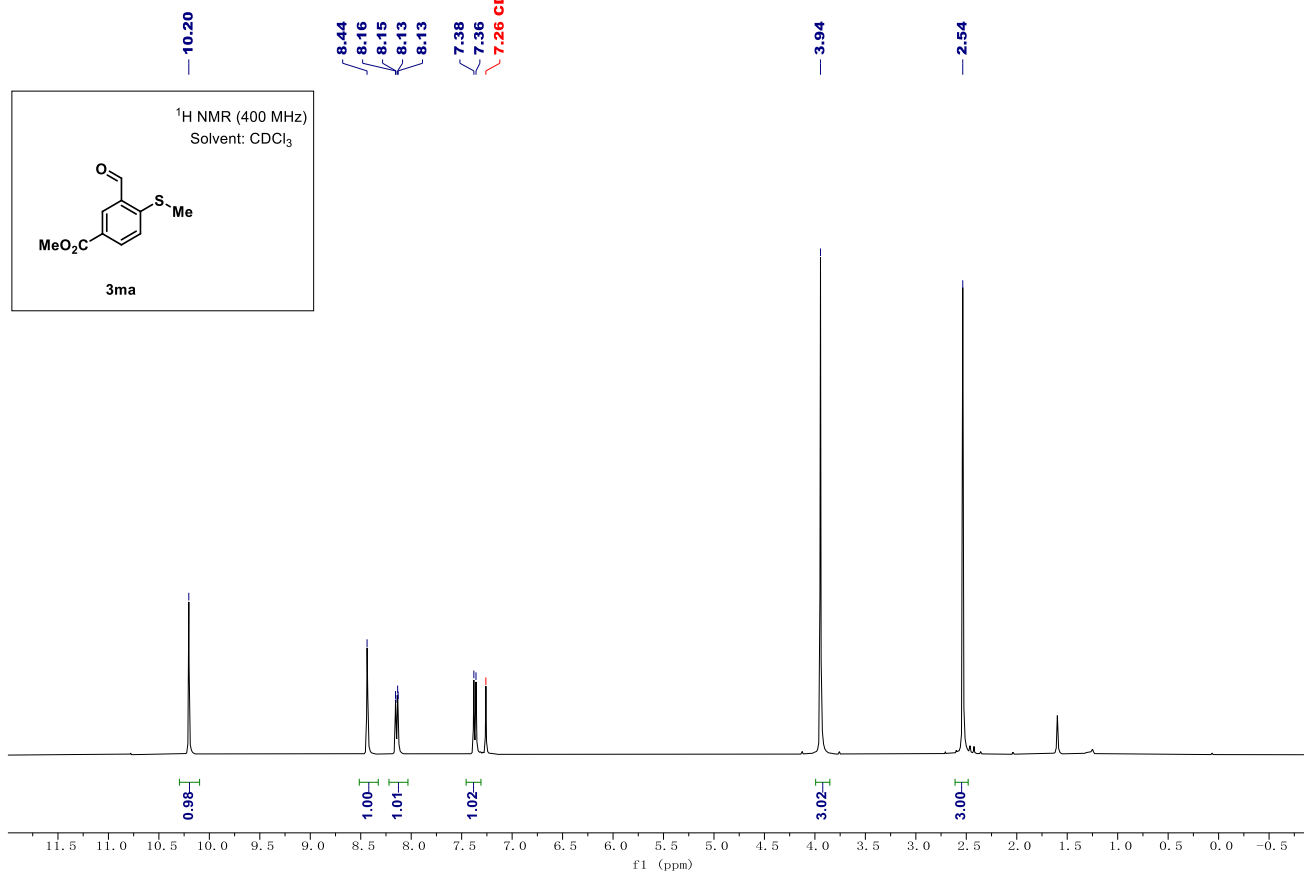

MMS-03-163-6. 11. fid  
 C13CPD CDCl3 {D:\Bruker\TOPSPIN\data\data\lhq} lhq 1

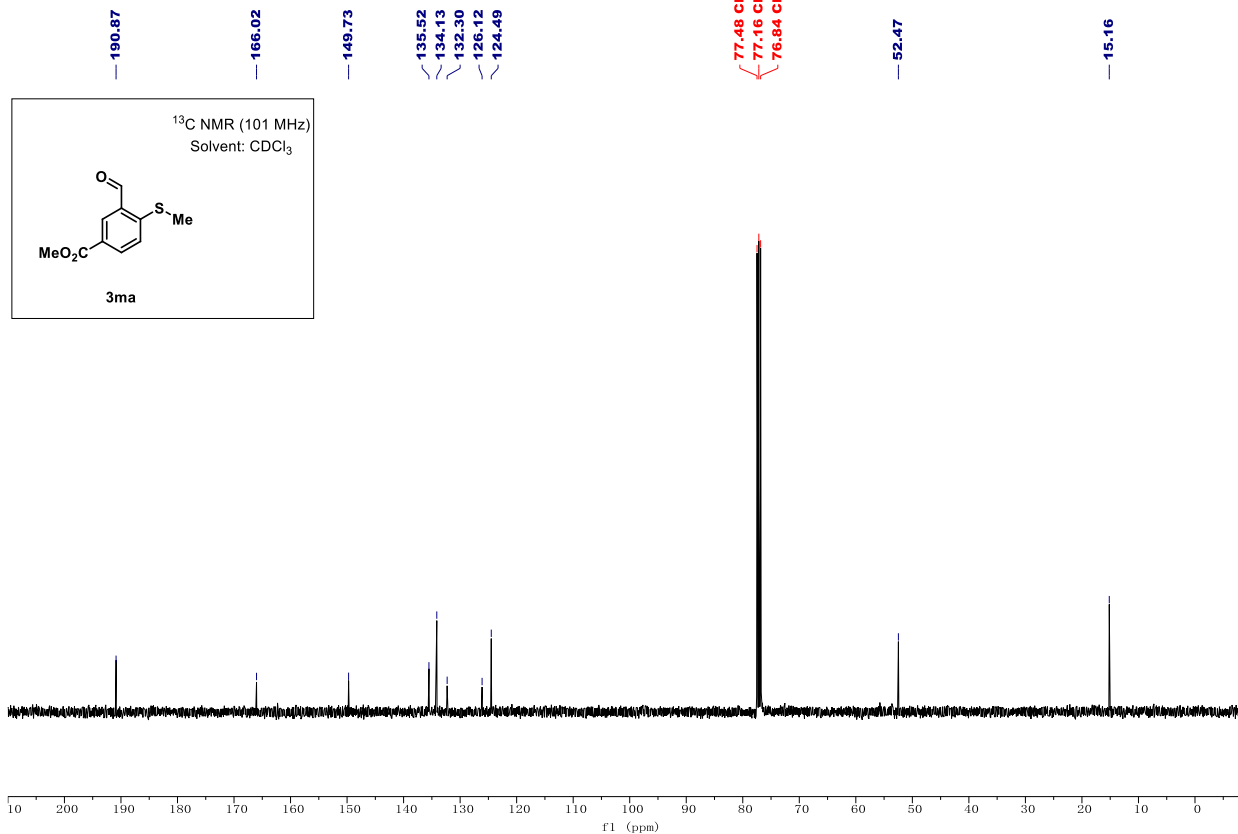

H-mms-03-73-5-1. 10. fid

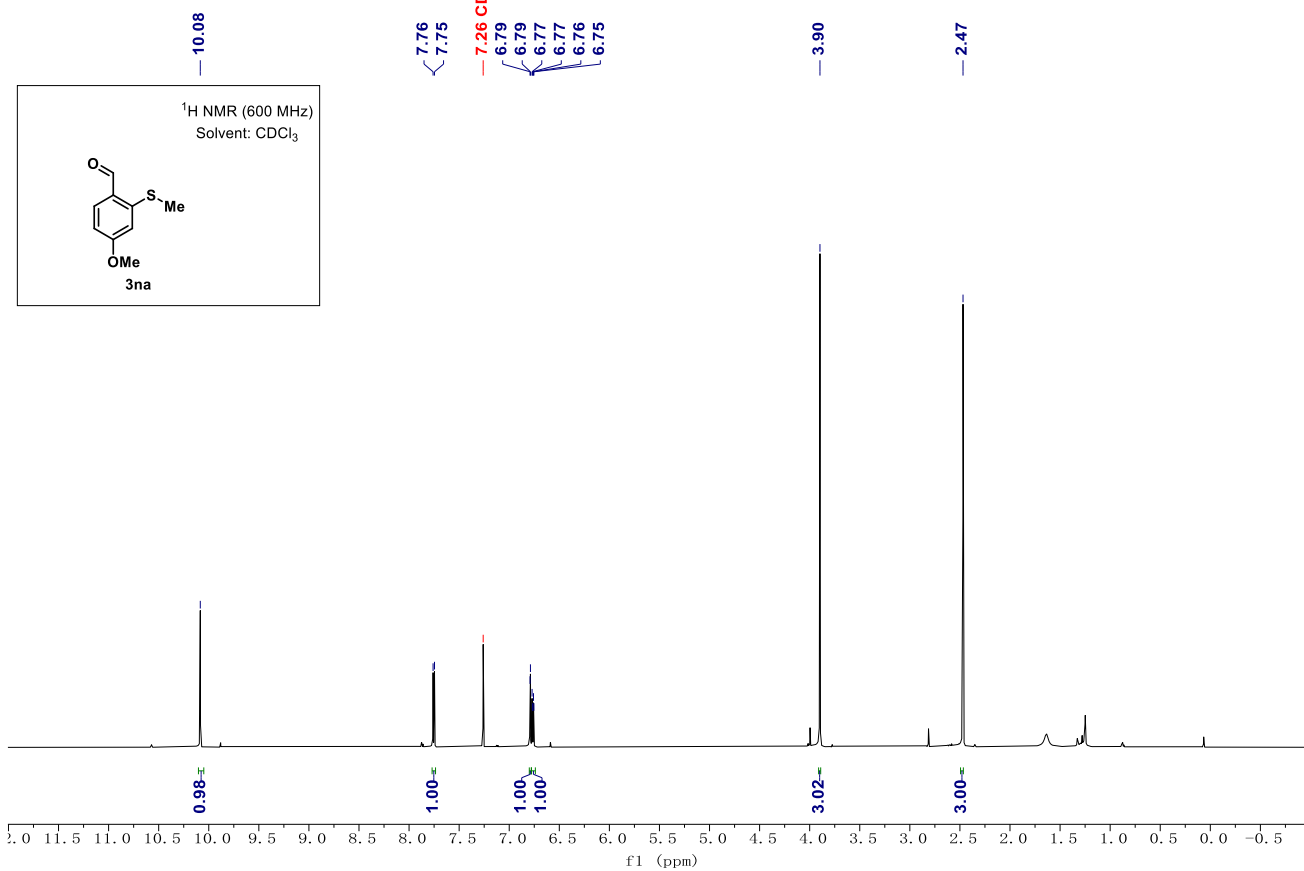

03-73-5-1. 11. fid

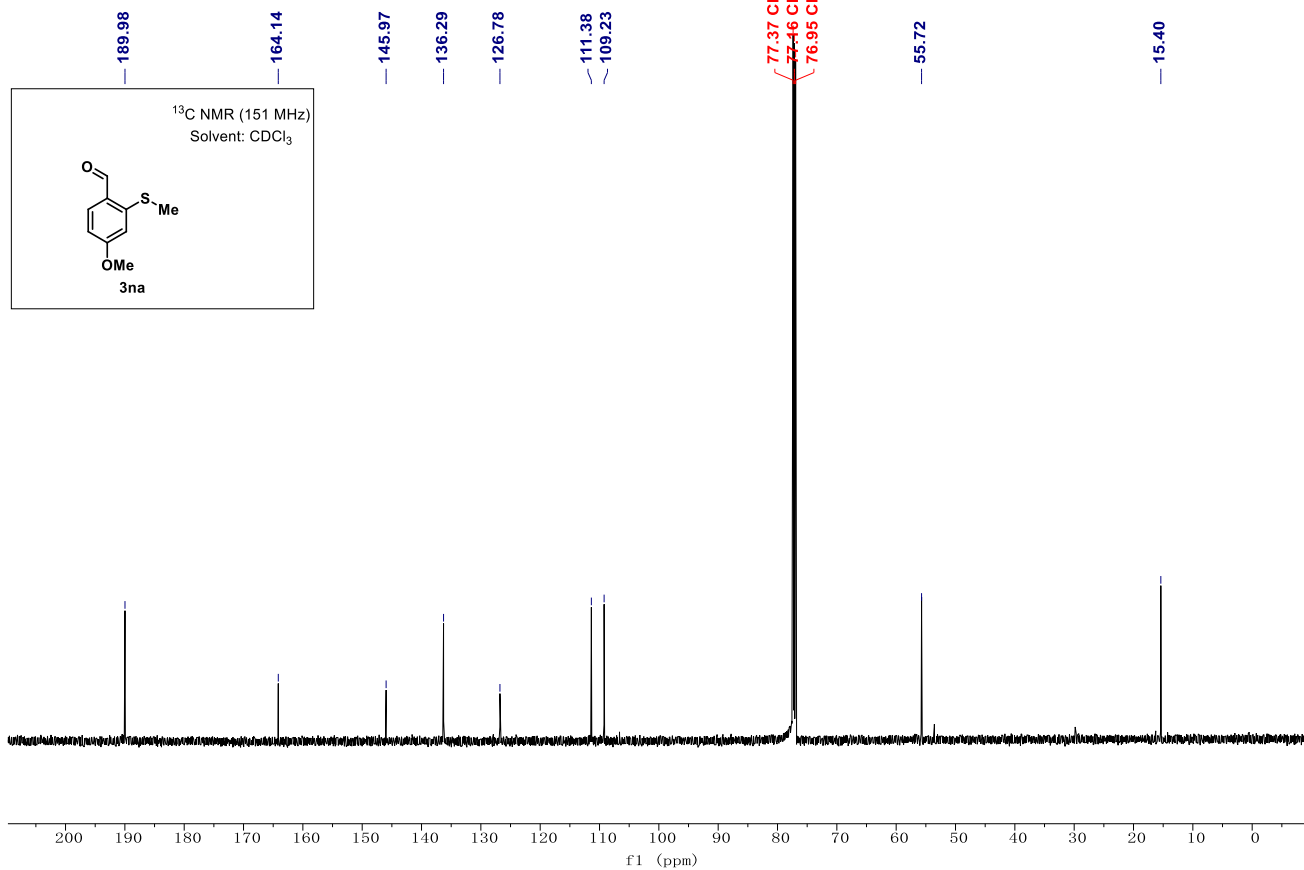

mms-03-70-5-2a.10.fid

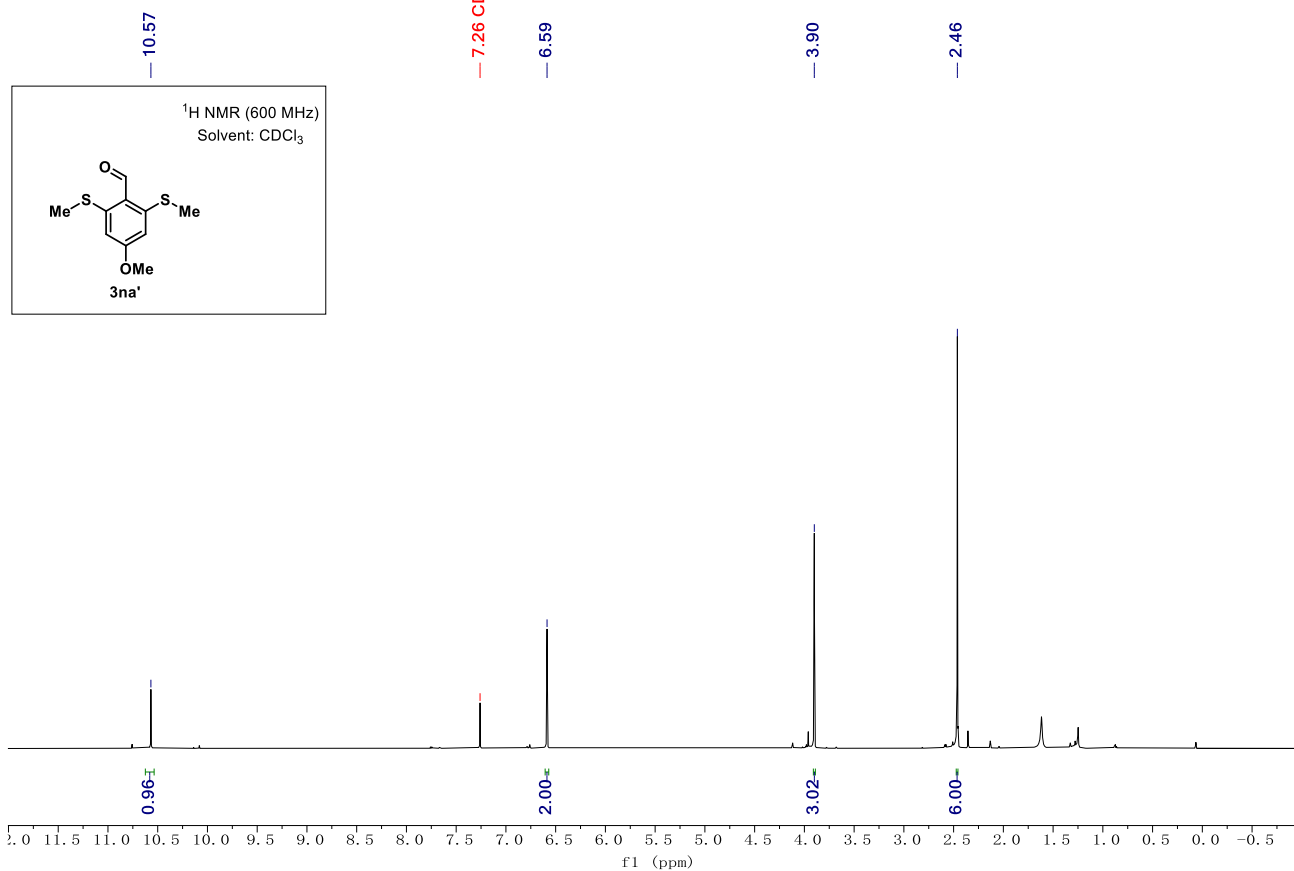

c-mms-03-70-5-2a.10.fid

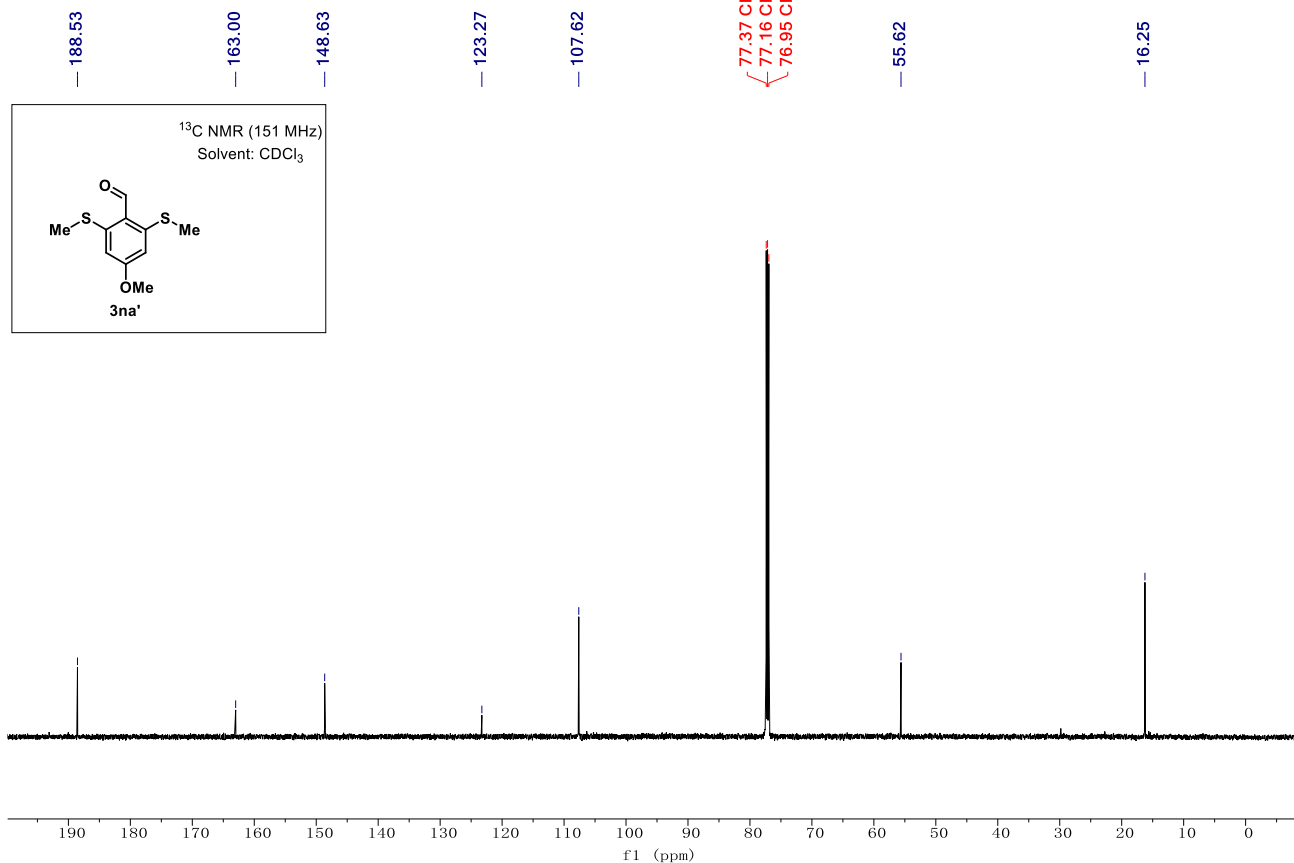

MMS-03-163-2A.10.fid  
 PROTON CDCl3 [D:\Bruker\TOPSPIN\data\data\lhq] 1hq 52

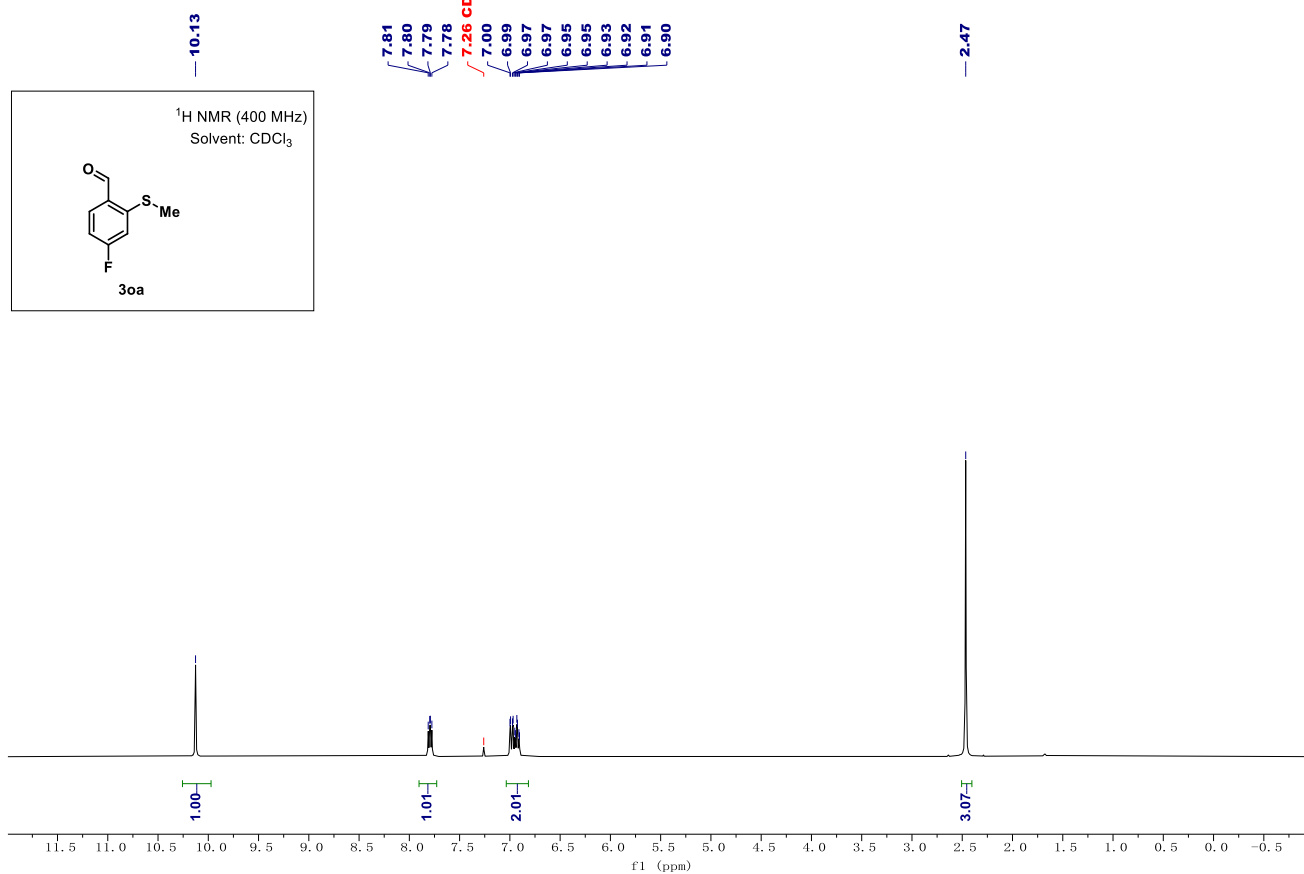

MMS-03-163-2A.11.fid  
 C13CPD CDCl3 [D:\Bruker\TOPSPIN\data\data\lhq] 1hq 52

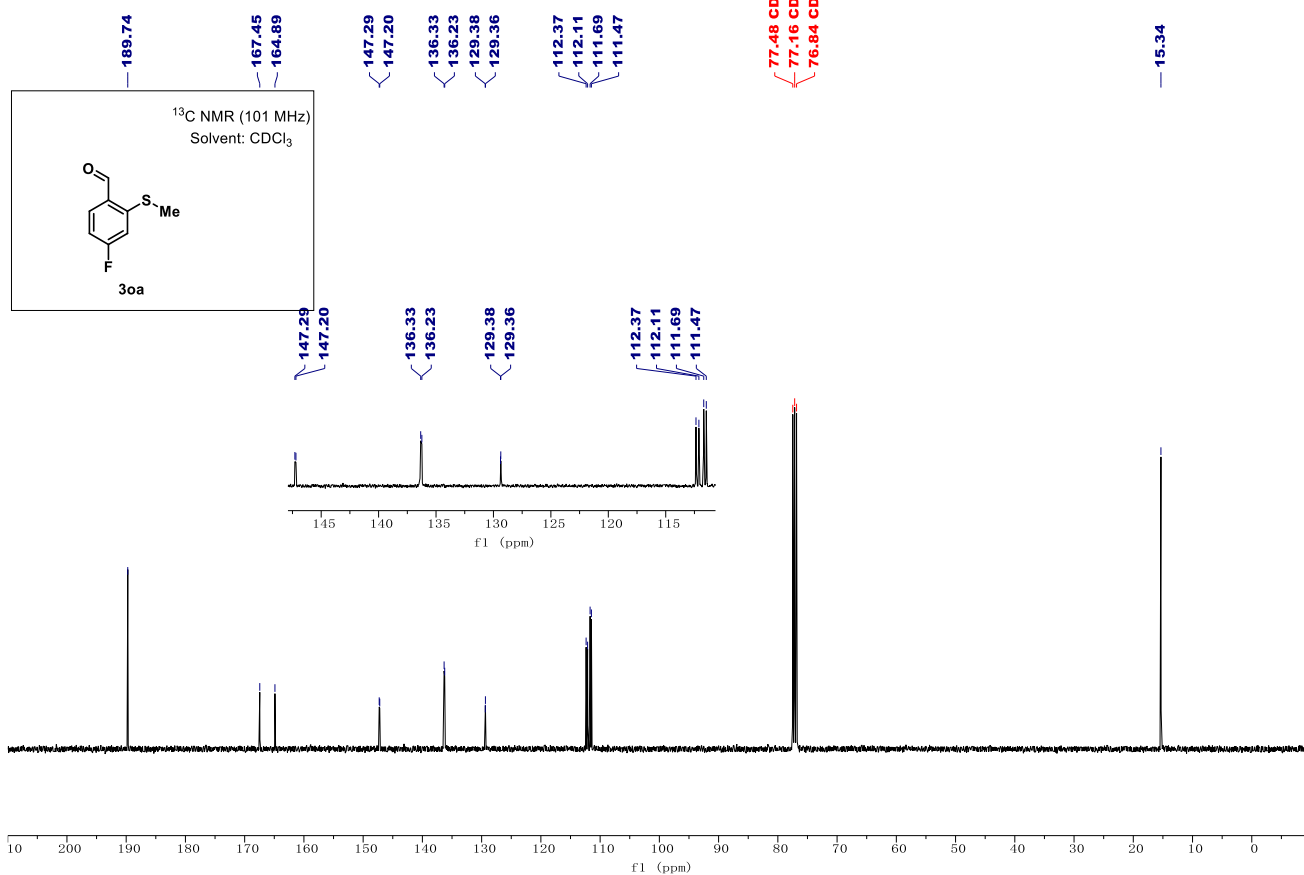

MMS-03-163-2A.12.fid  
F19CPD CDC13 {D:\Bruker\TOPSPIN\data\data\1hq} 1hq 52

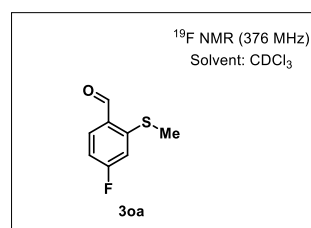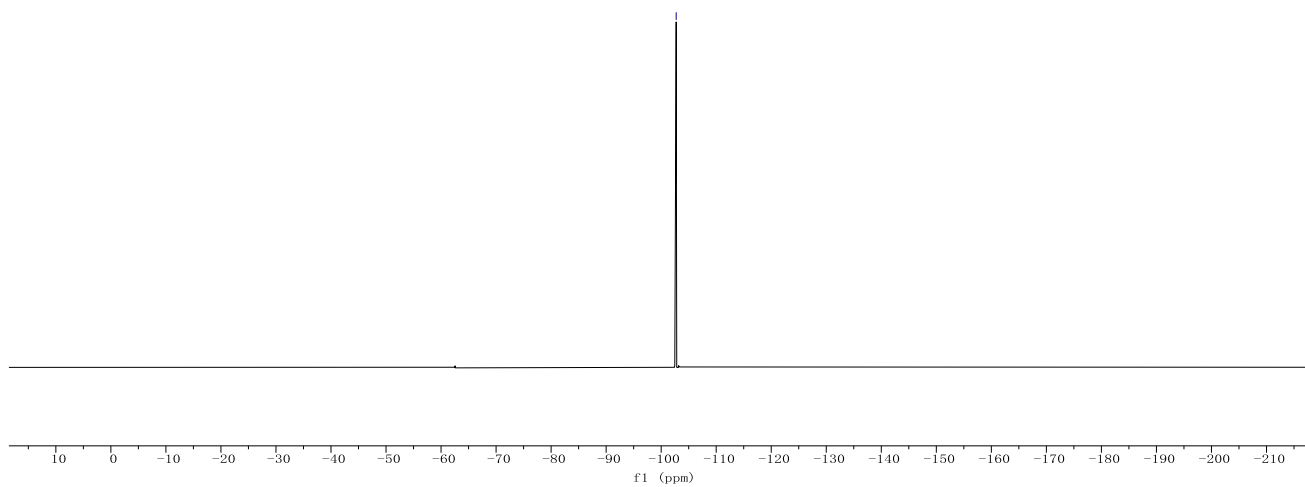

H-mms-03-74-6-2.10.fid

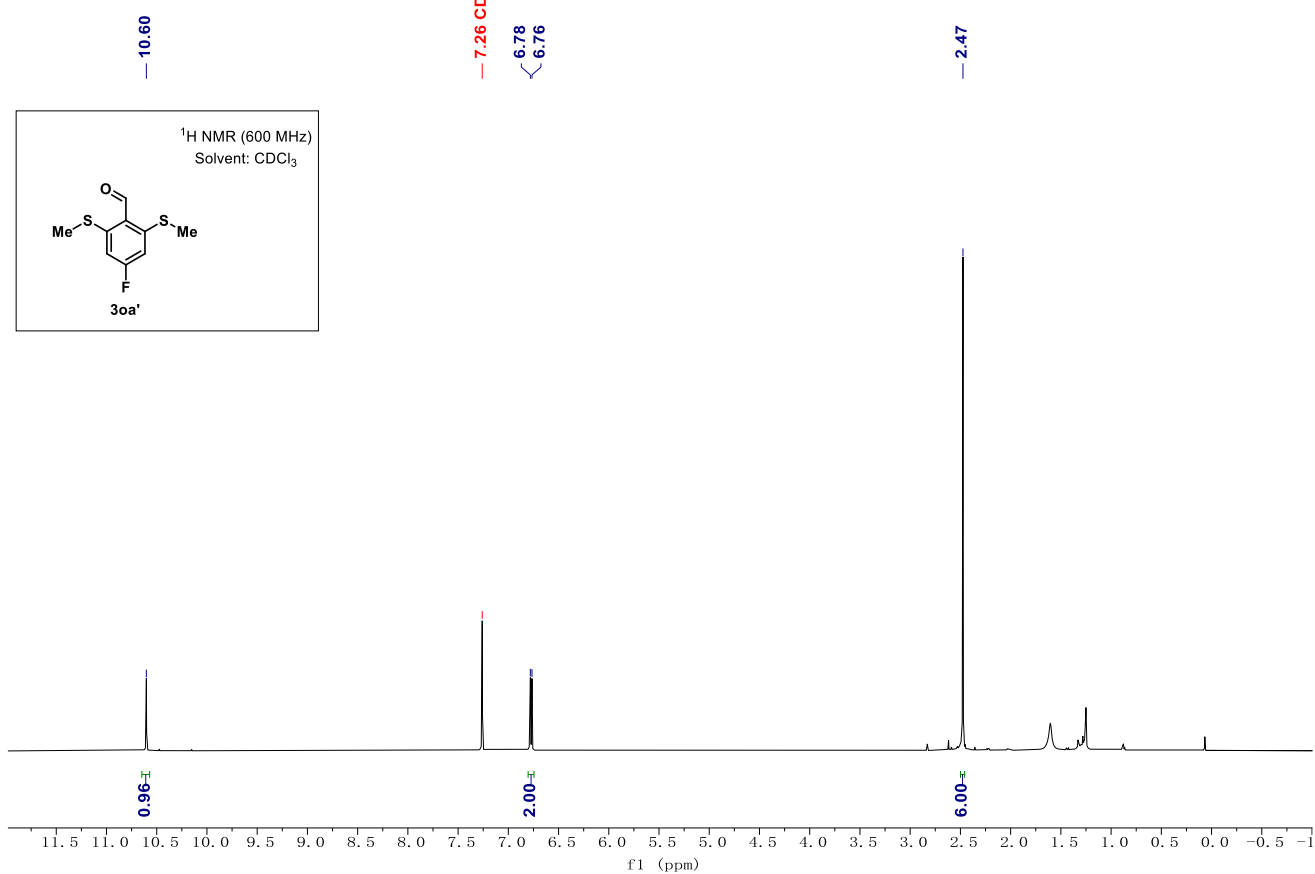

03-74-6-2.11.fid

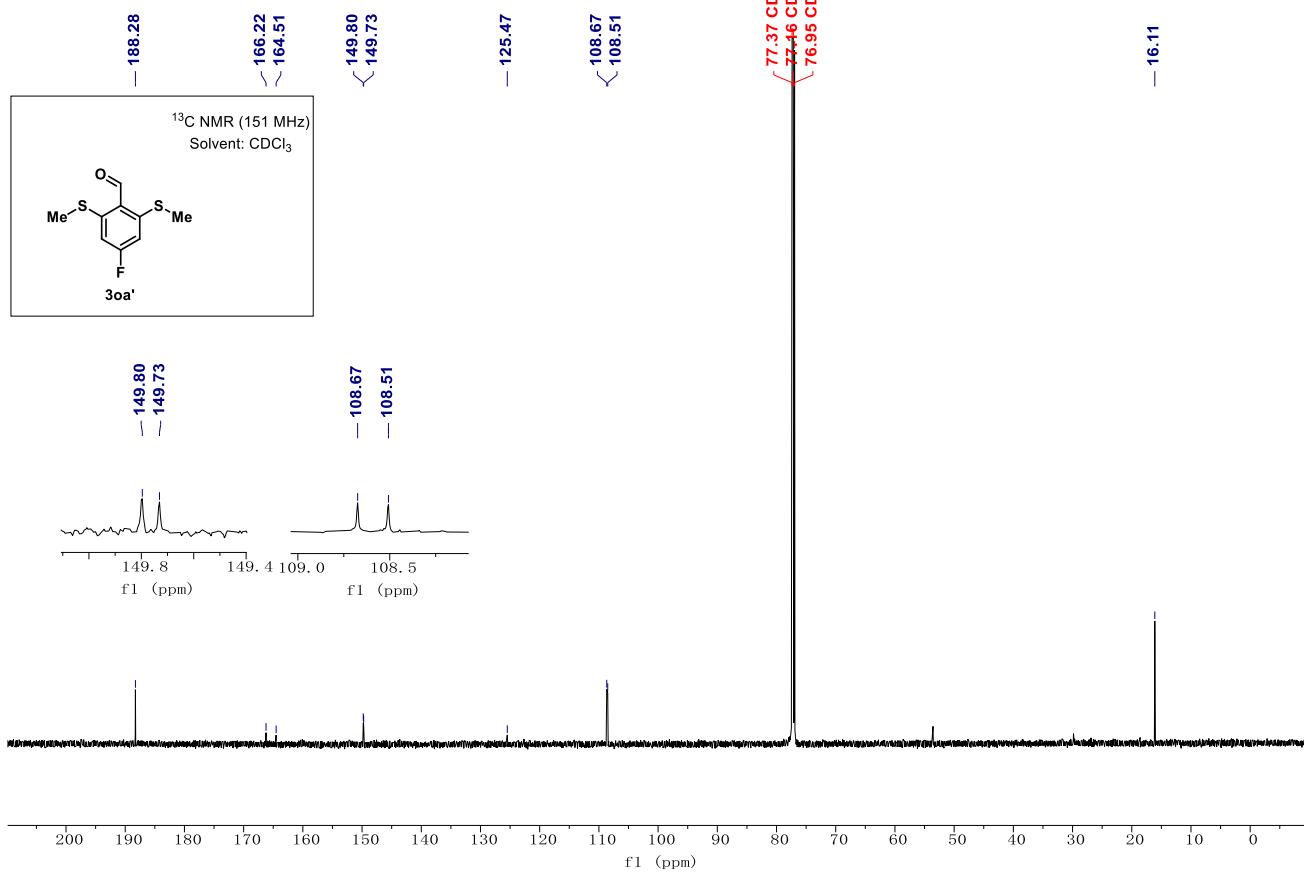

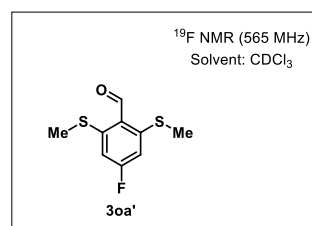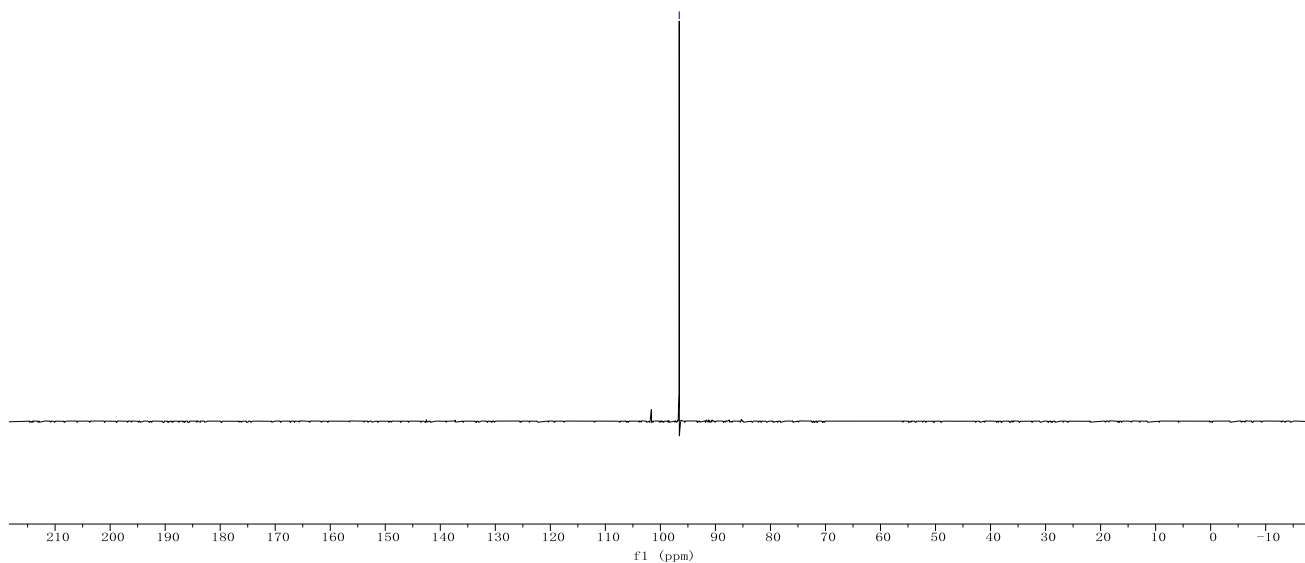

MMS-03-107-1B. 10. fid  
 PROTON CDC13 {D:\Bruker\TOPSPIN\data\data\lhq} 1hq 58

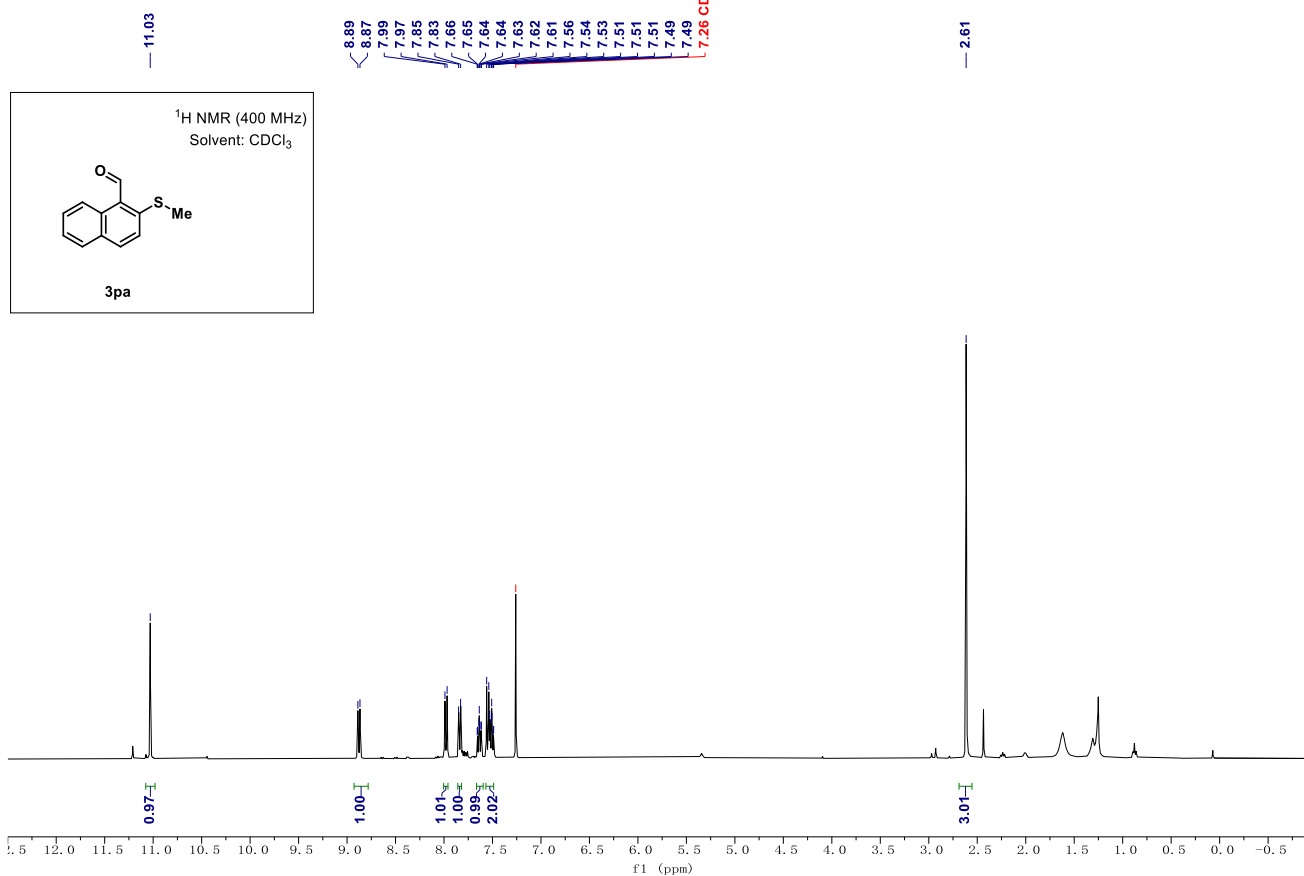

MMS-03-107-1B. 20. fid  
 C13CPD CDC13 {D:\Bruker\TOPSPIN\data\data\lhq} 1hq 37

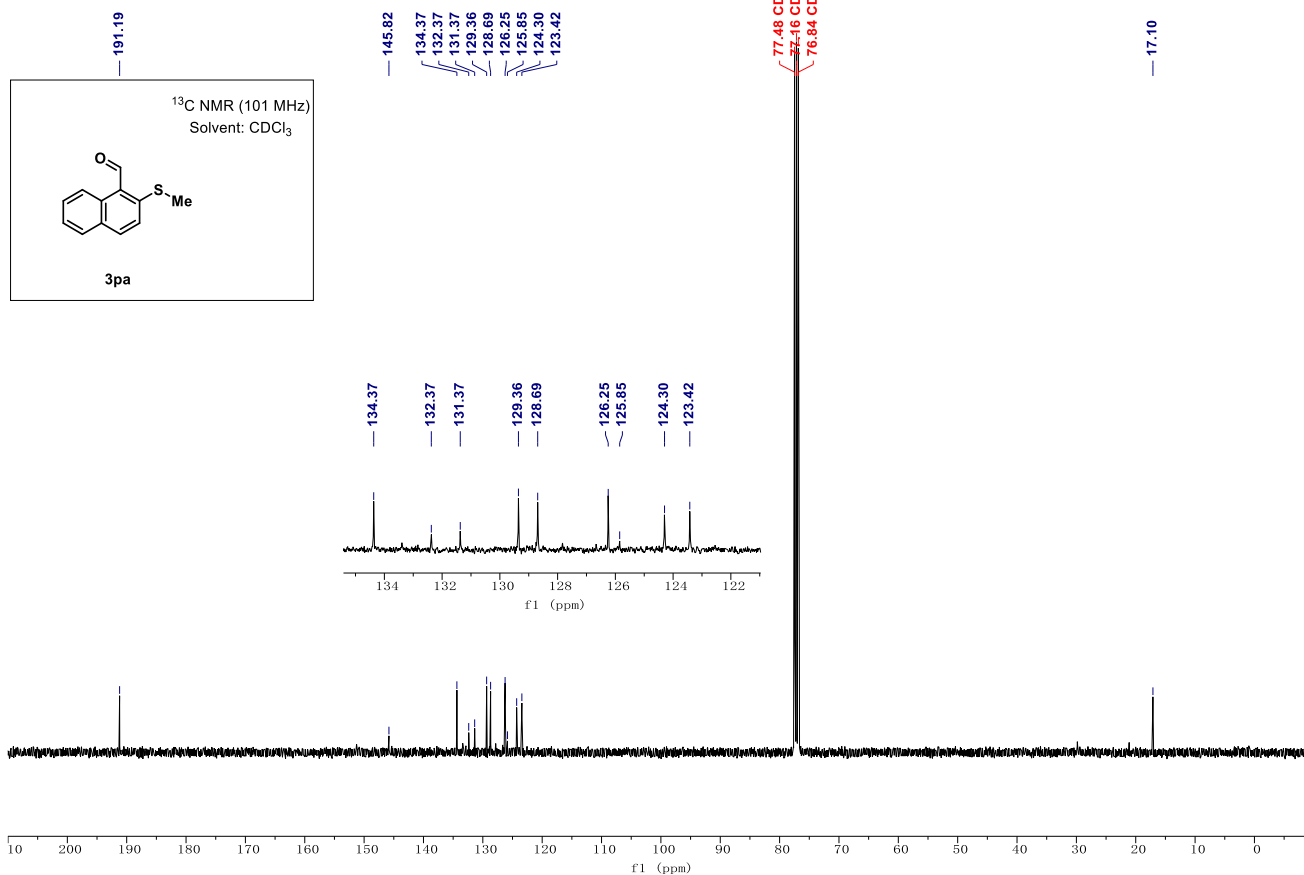



mms-03-76-2-2, 10, fid

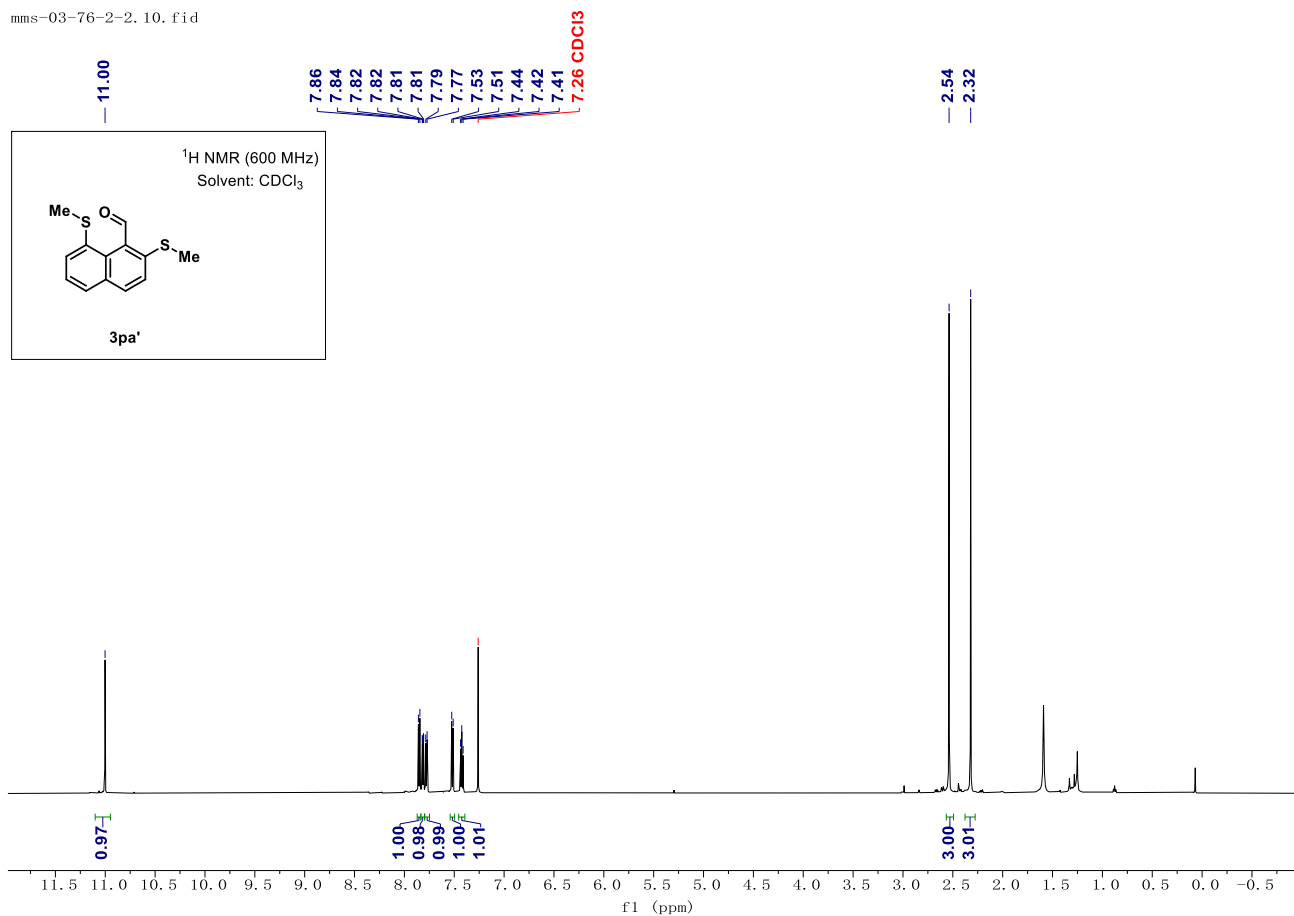

mms-03-76-2-2, 11, fid

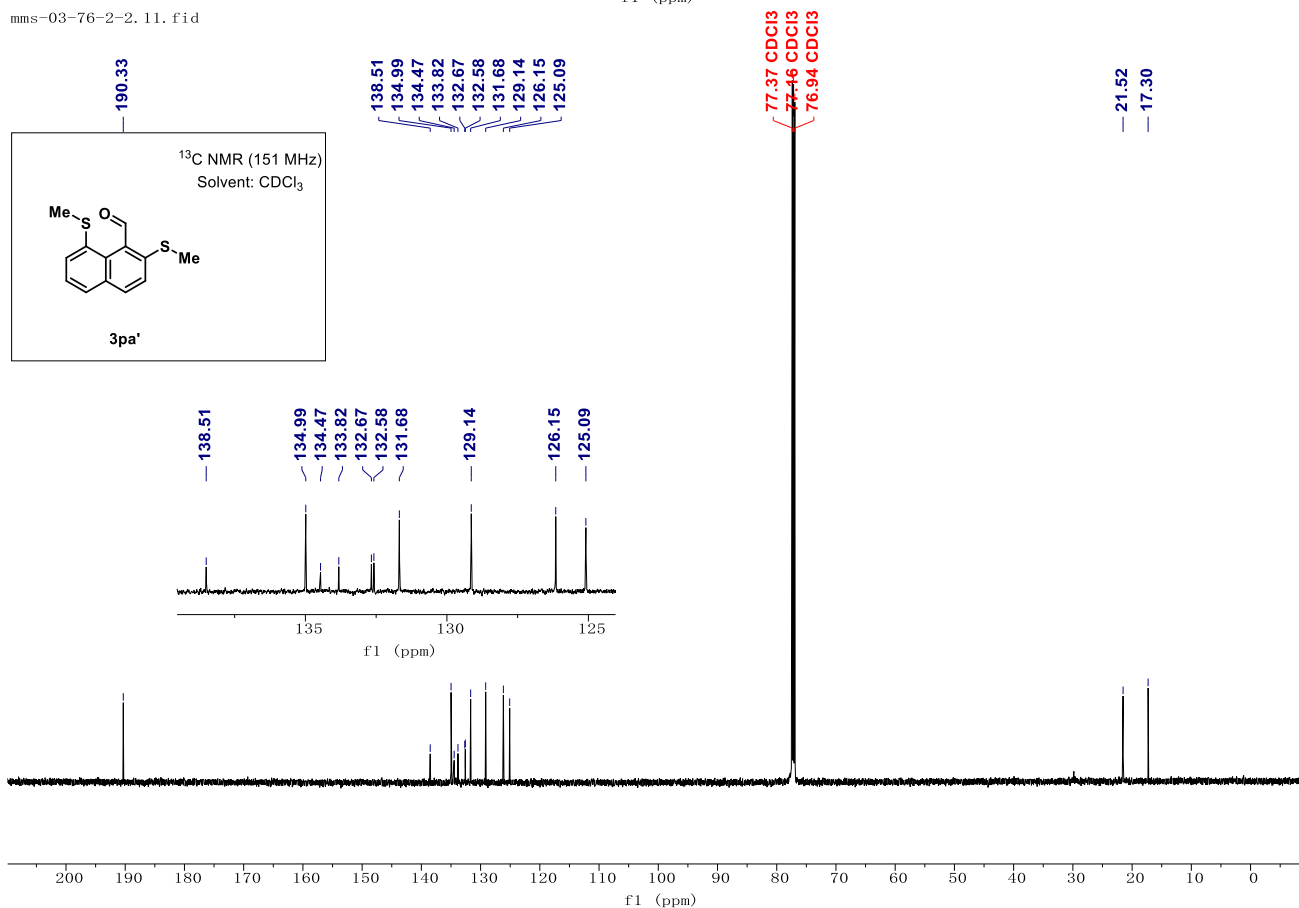

MMS-03-117-2. 10. fid  
 PROTON CDCl3 {D:\Bruker\TOPSPIN\data\data\lhq} 1hq 56

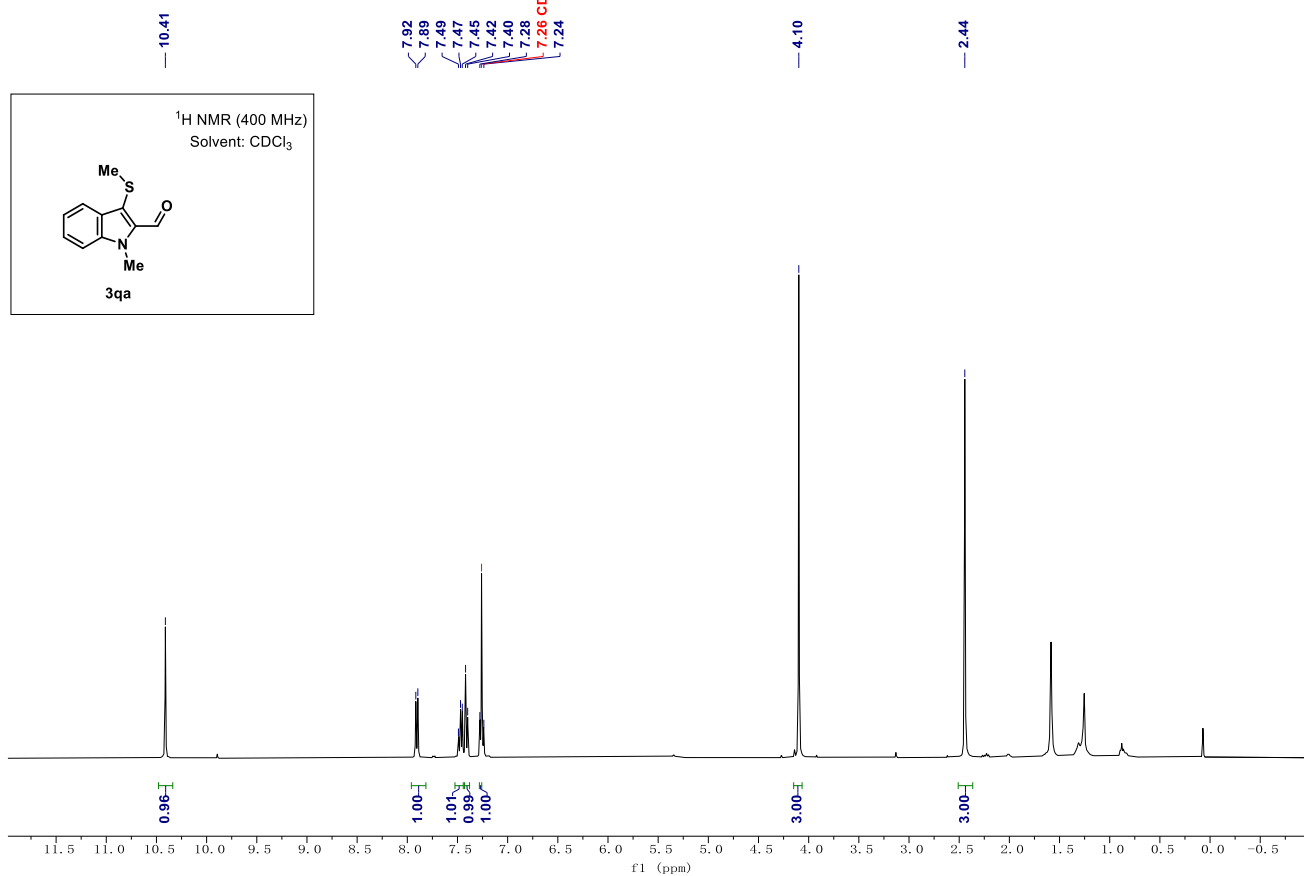

03-117-2. 11. fid  
 C13CPD CDCl3 {D:\Bruker\TOPSPIN\data\data\lhq} 1hq 56

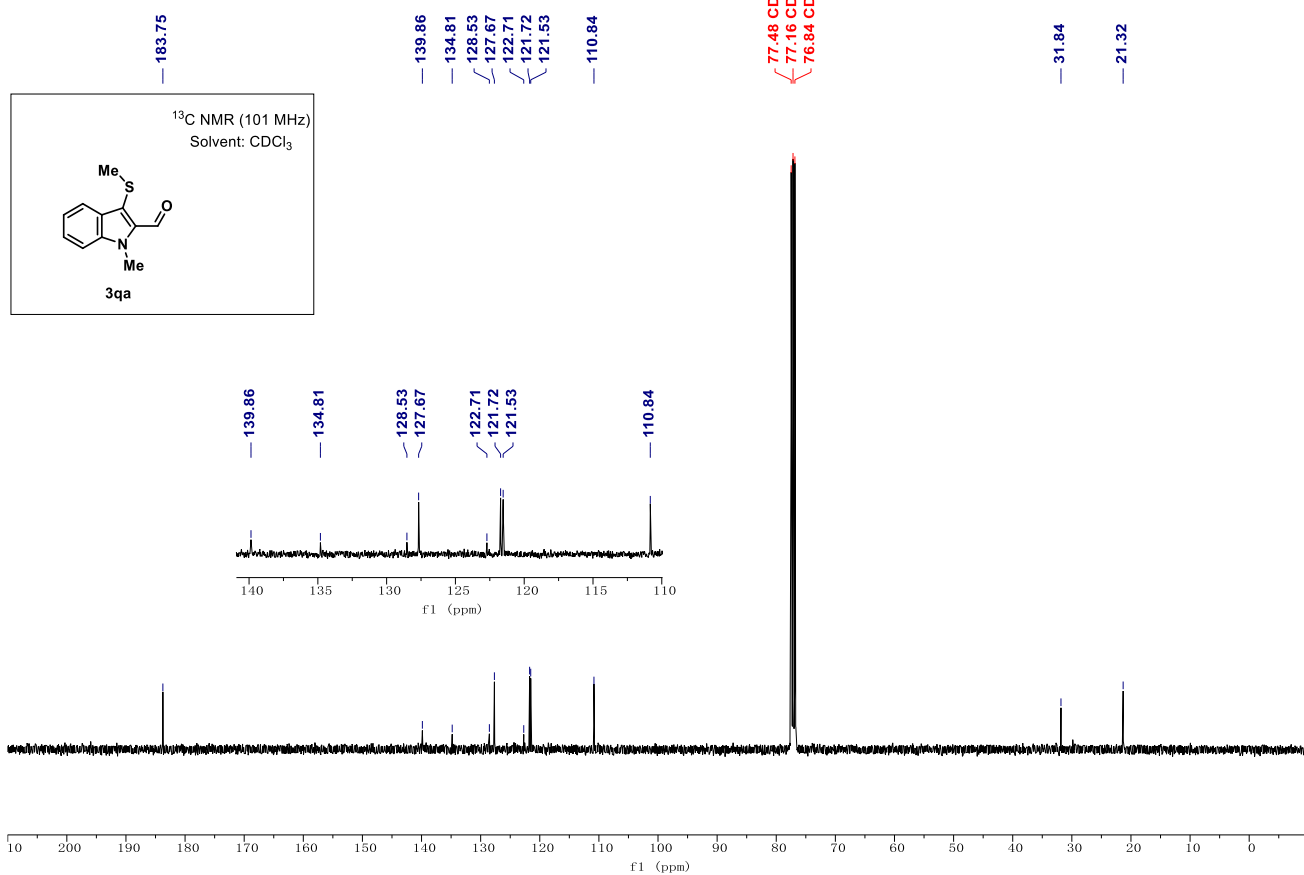

MMS-03-163-3B.10.fid  
 PROTON CDCl3 {D:\Bruker\TOPSPIN\data\data\1hq} 1hq 57

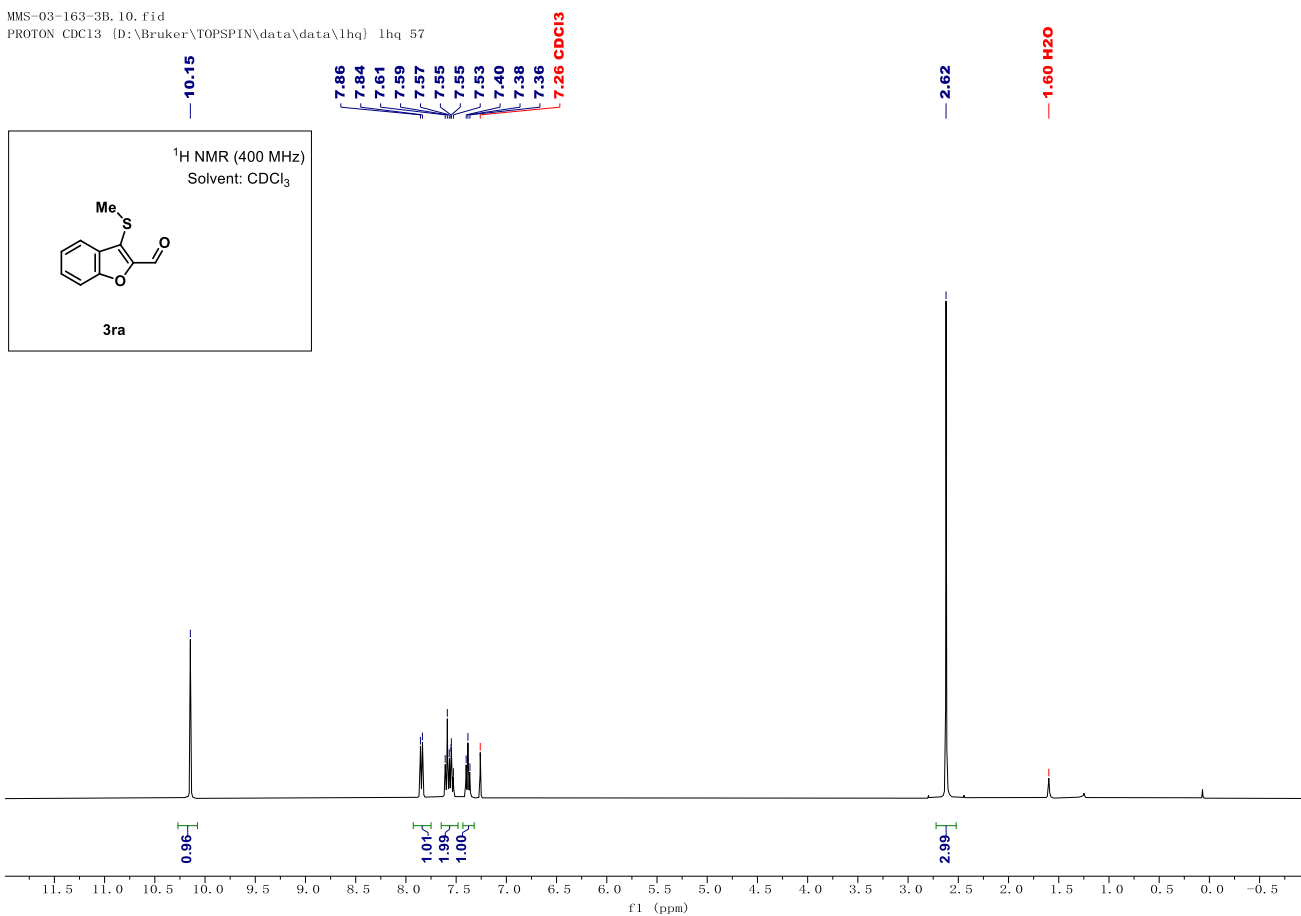

MMS-03-163-3B.11.fid  
 C13CPD CDCl3 {D:\Bruker\TOPSPIN\data\data\1hq} 1hq 57

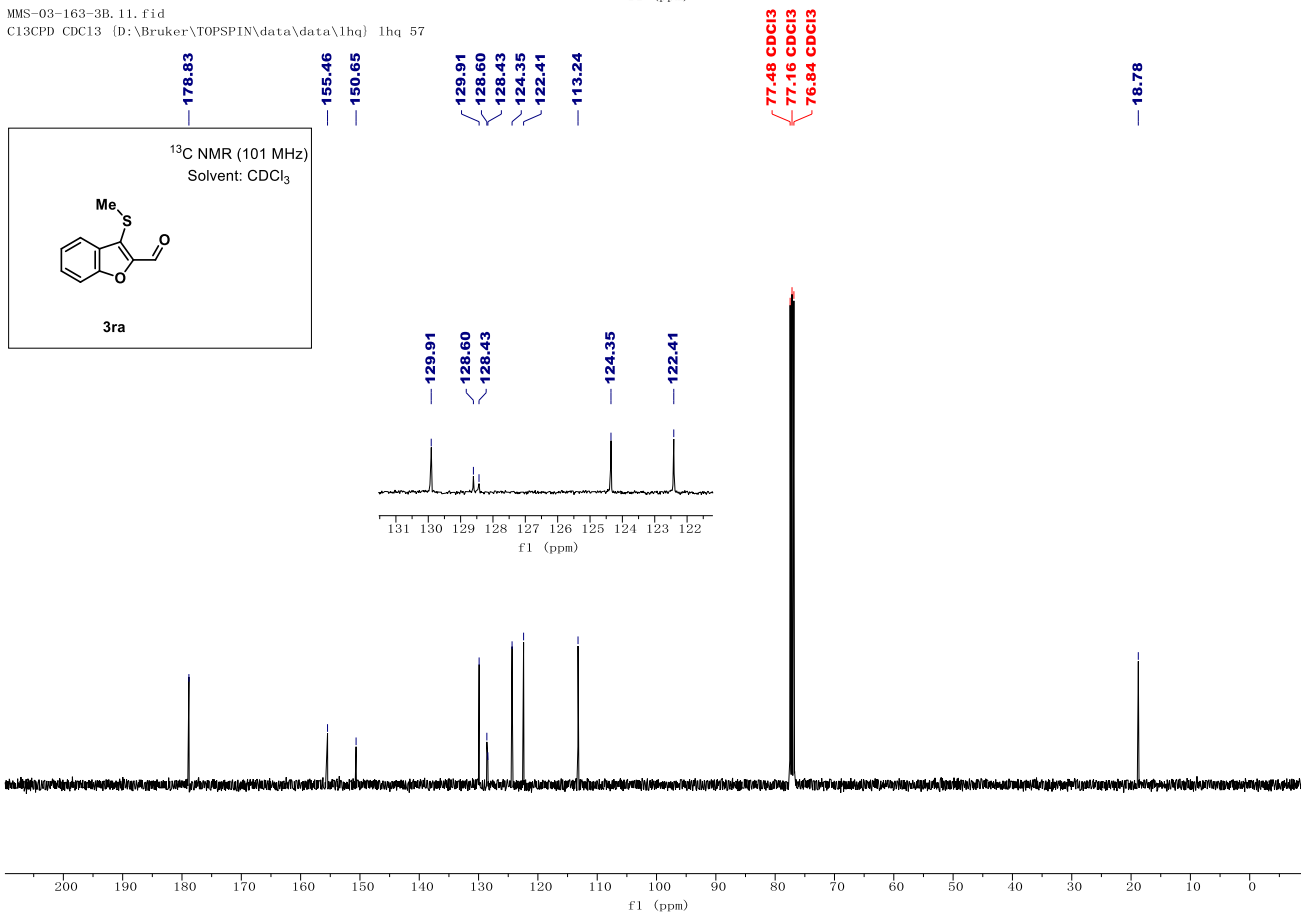

MMS-03-163-4B. 10. 16  
 PROTON CDC13 (D:\Bruker\TOPSPIN\data\data\1h) 38

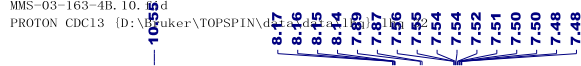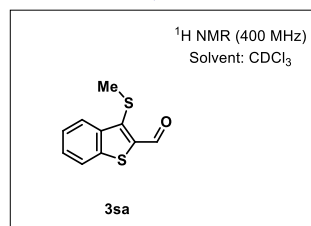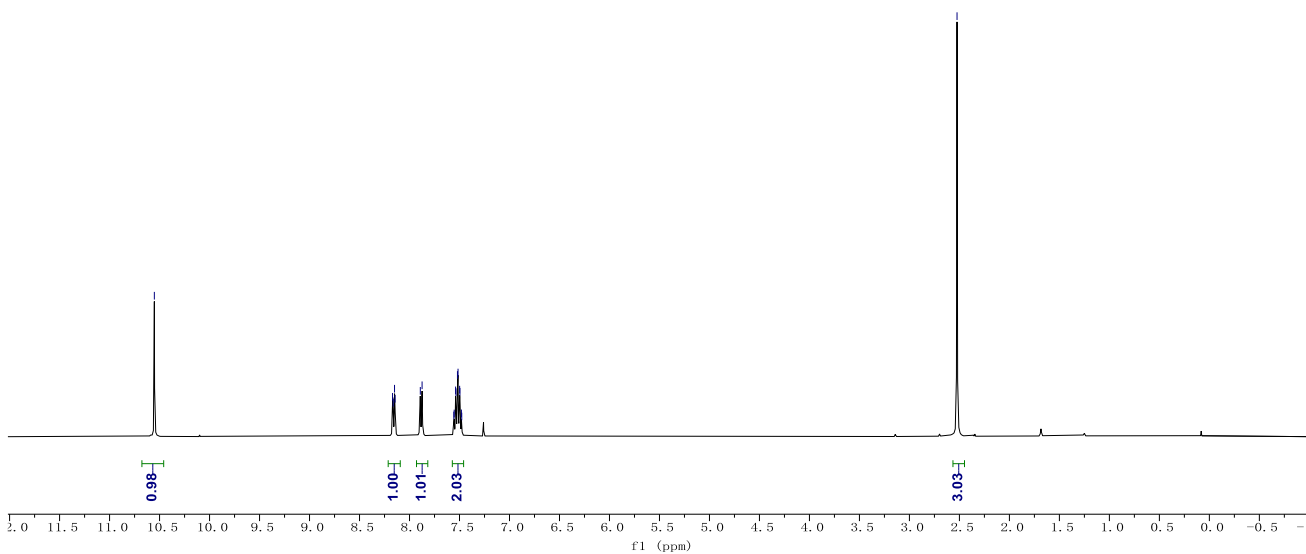

MMS-03-163-4B. 20. fid  
 C13CPD CDC13 (D:\Bruker\TOPSPIN\data\data\1h) 38

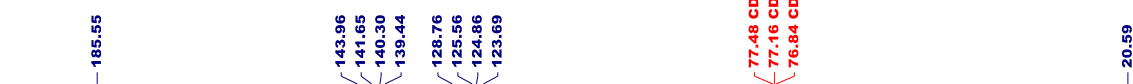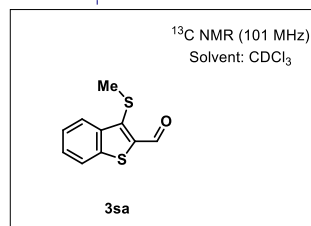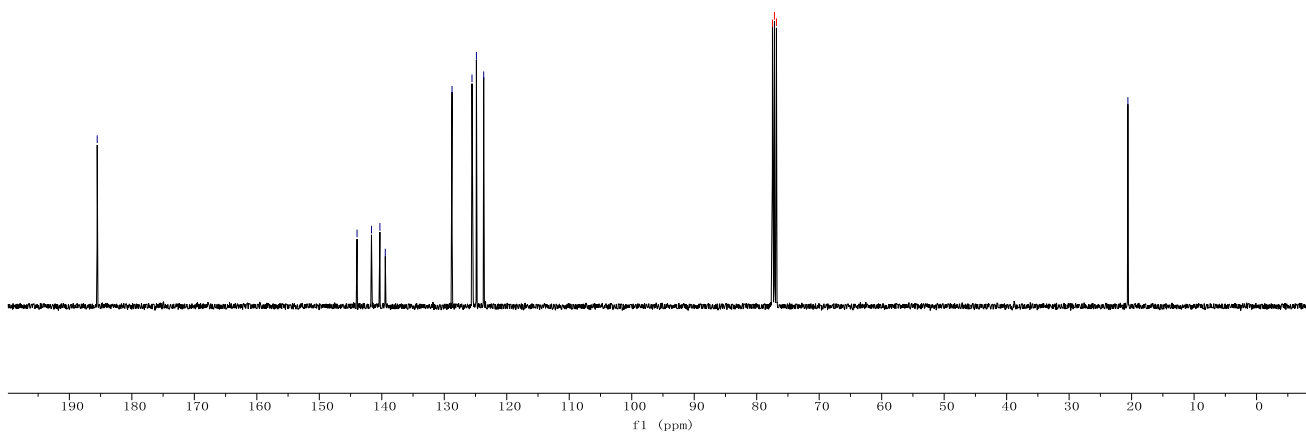

MMS-03-94. 10. fid  
 PROTON CDC13 {D:\Bruker\TOPSPIN\data\data\lhq} lhq 56

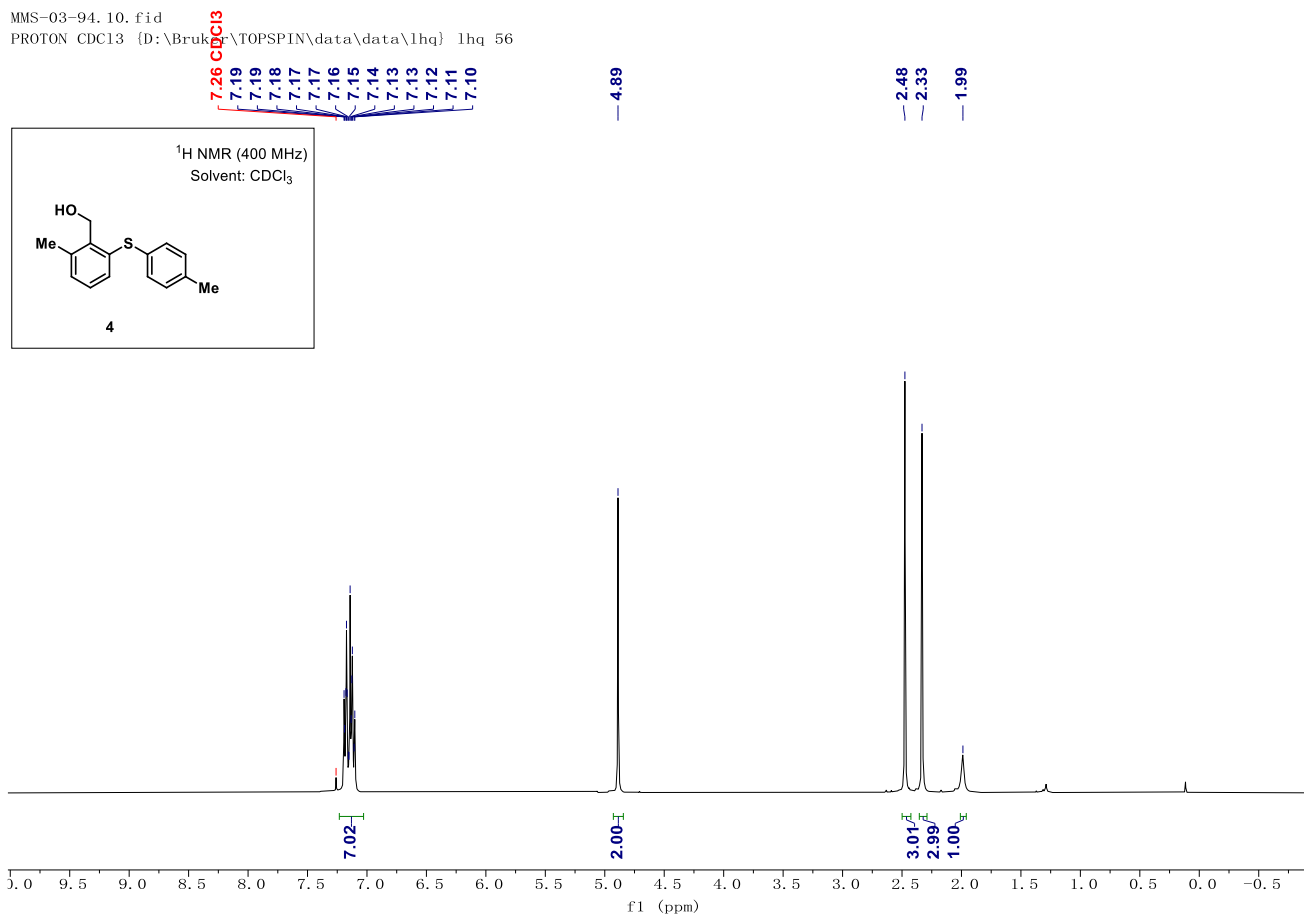

MMS-03-94. 11. fid  
 C13CPD CDC13 {D:\Bruker\TOPSPIN\data\data\lhq} lhq 56

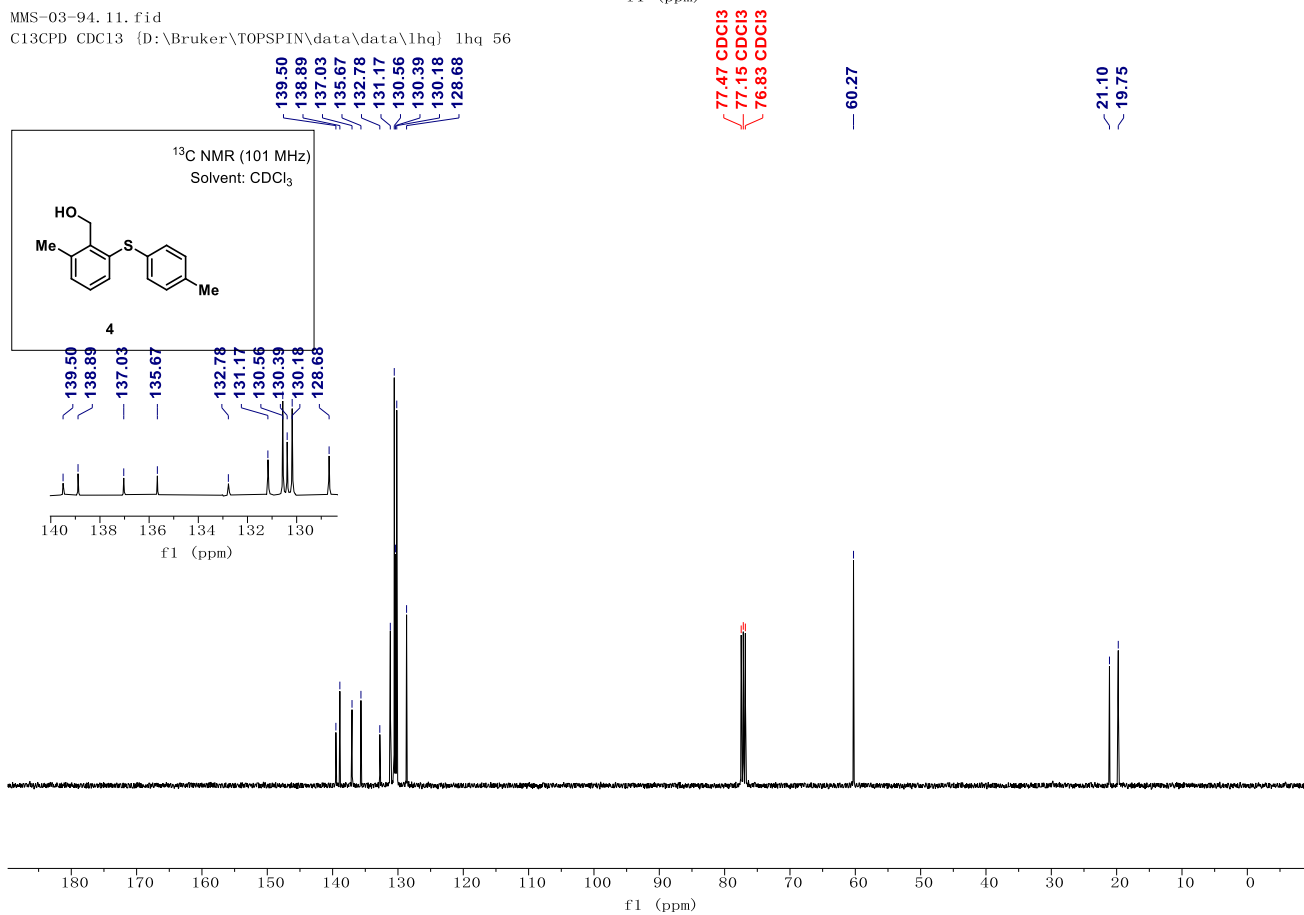

MMS-03-110-1. 10. fid  
 PROTON CDCl3 {D:\Bruker\TOPSPIN\data\data\

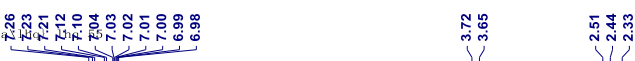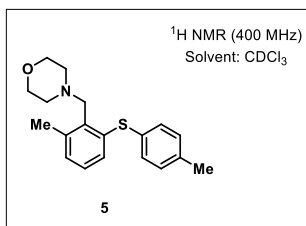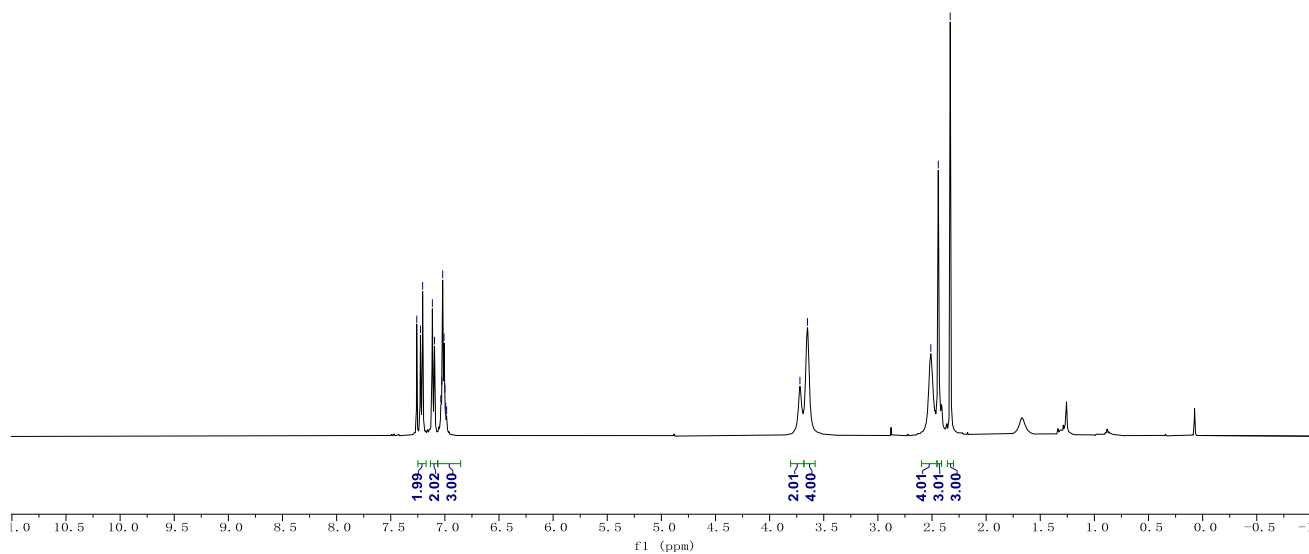

C-MMS-03-110-1. 10. fid  
 C13CPD CDCl3 {D:\Bruker\TOPSPIN\data\data\l1h} l1h 55

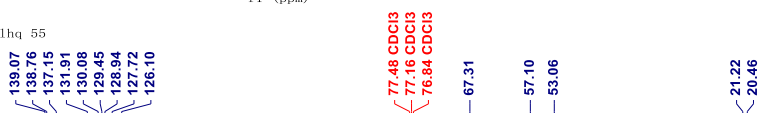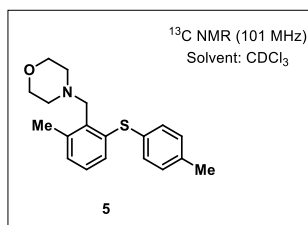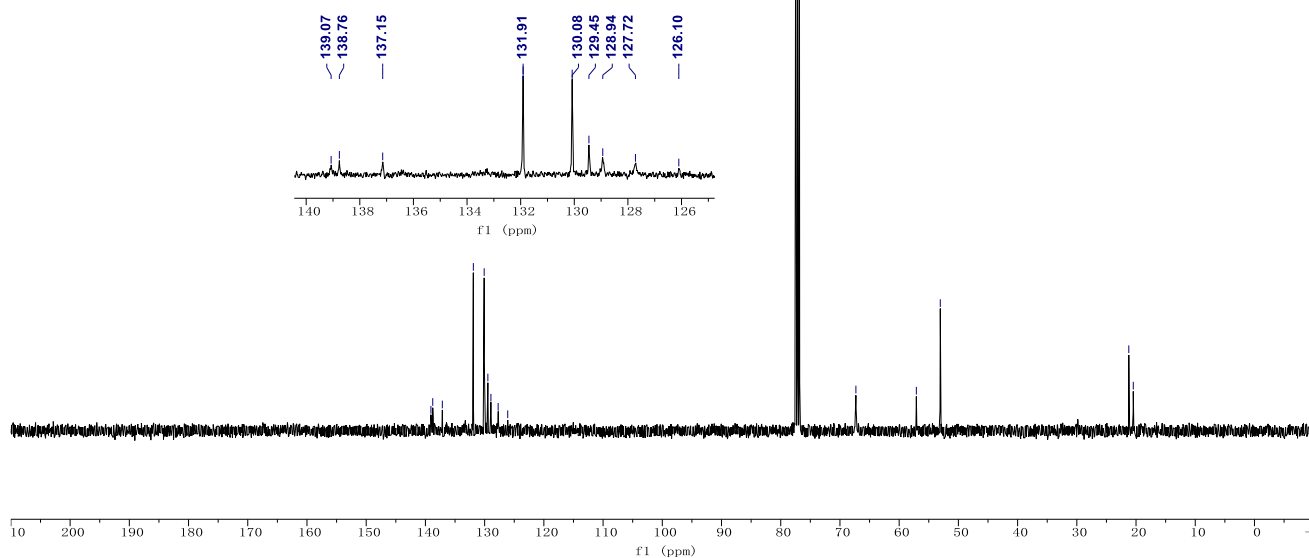

MMS-03-93. 10. fid

PROTON CDC13 {D:\Bruker\TOPSPIN\data\data\lhq} 1hq 30

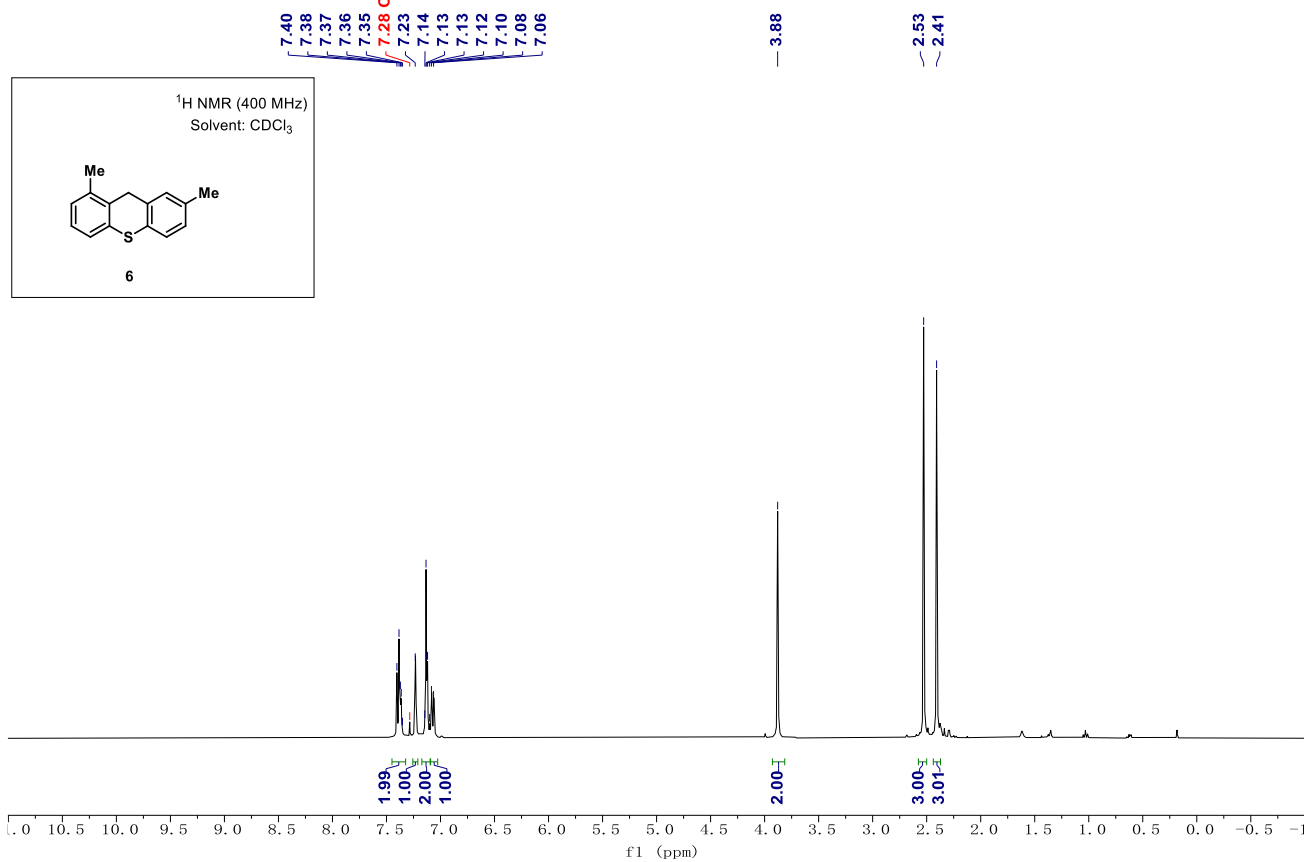

MMS-03-93. 11. fid

C13CPD CDC13 {D:\Bruker\TOPSPIN\data\data\lhq} 1hq 30

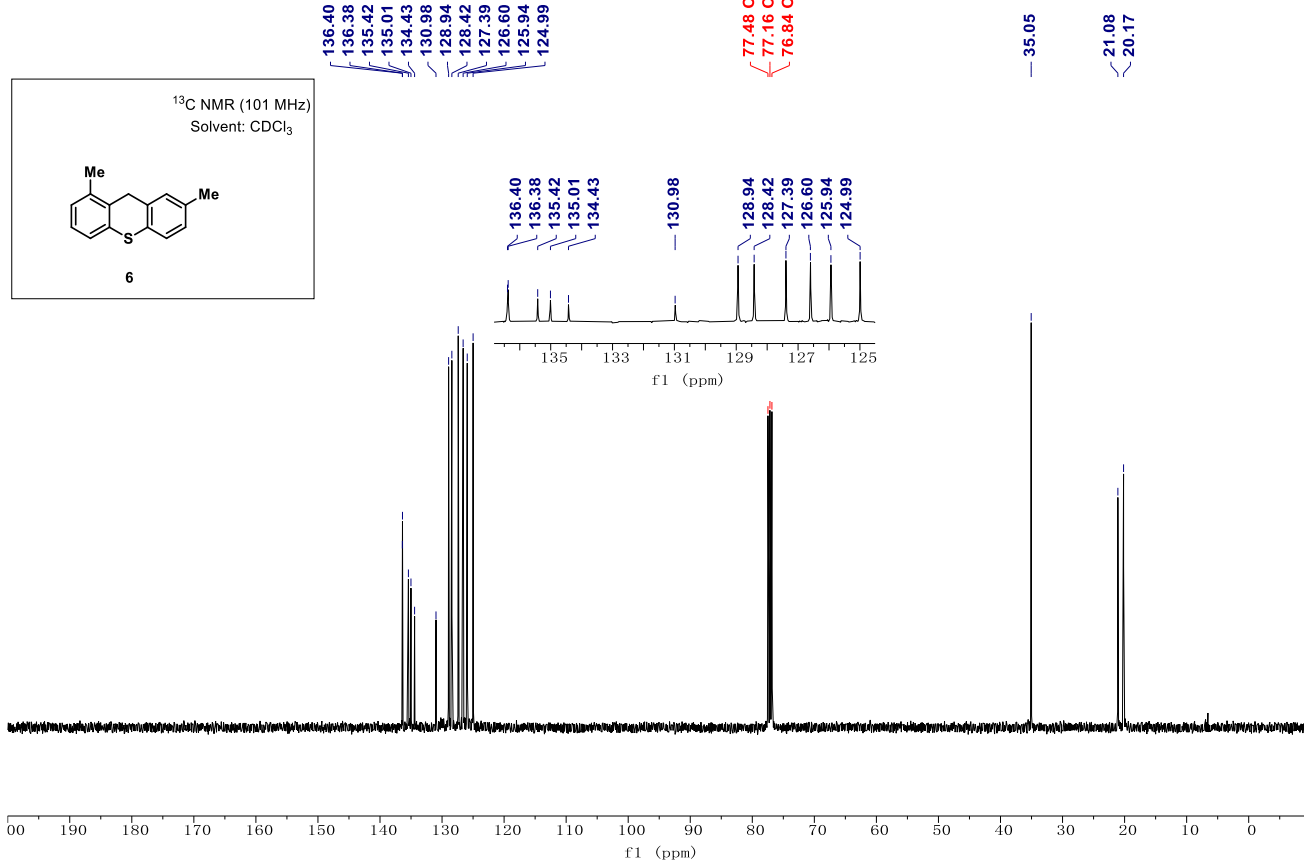

MMS-03-95. 10. fid

PROTON CDC13 {D:\Bruker\TOPSPIN\data\data\lhq} lhq 32

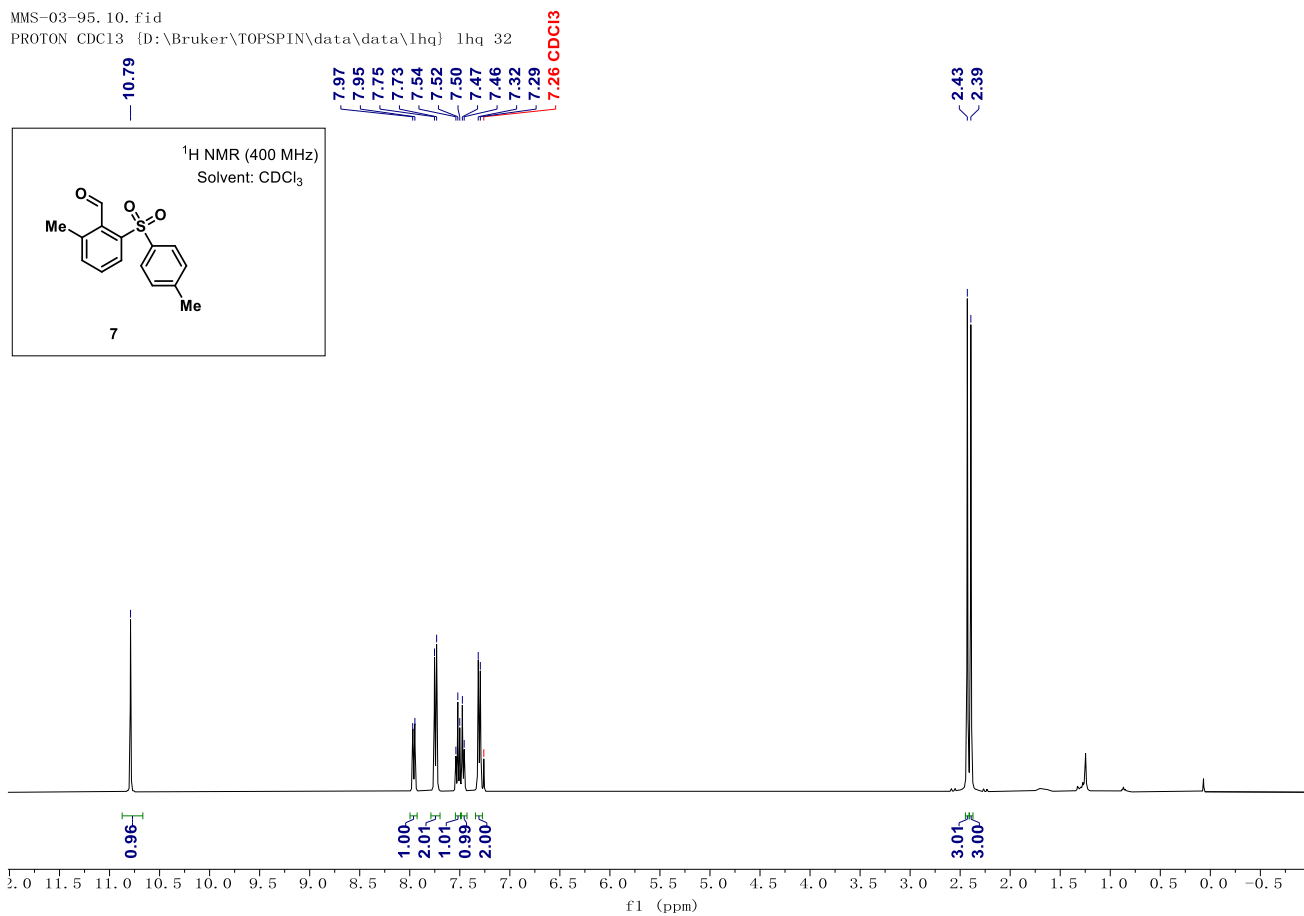

MMS-03-95. 11. fid

C13CPD CDC13 {D:\Bruker\TOPSPIN\data\data\lhq} lhq 32

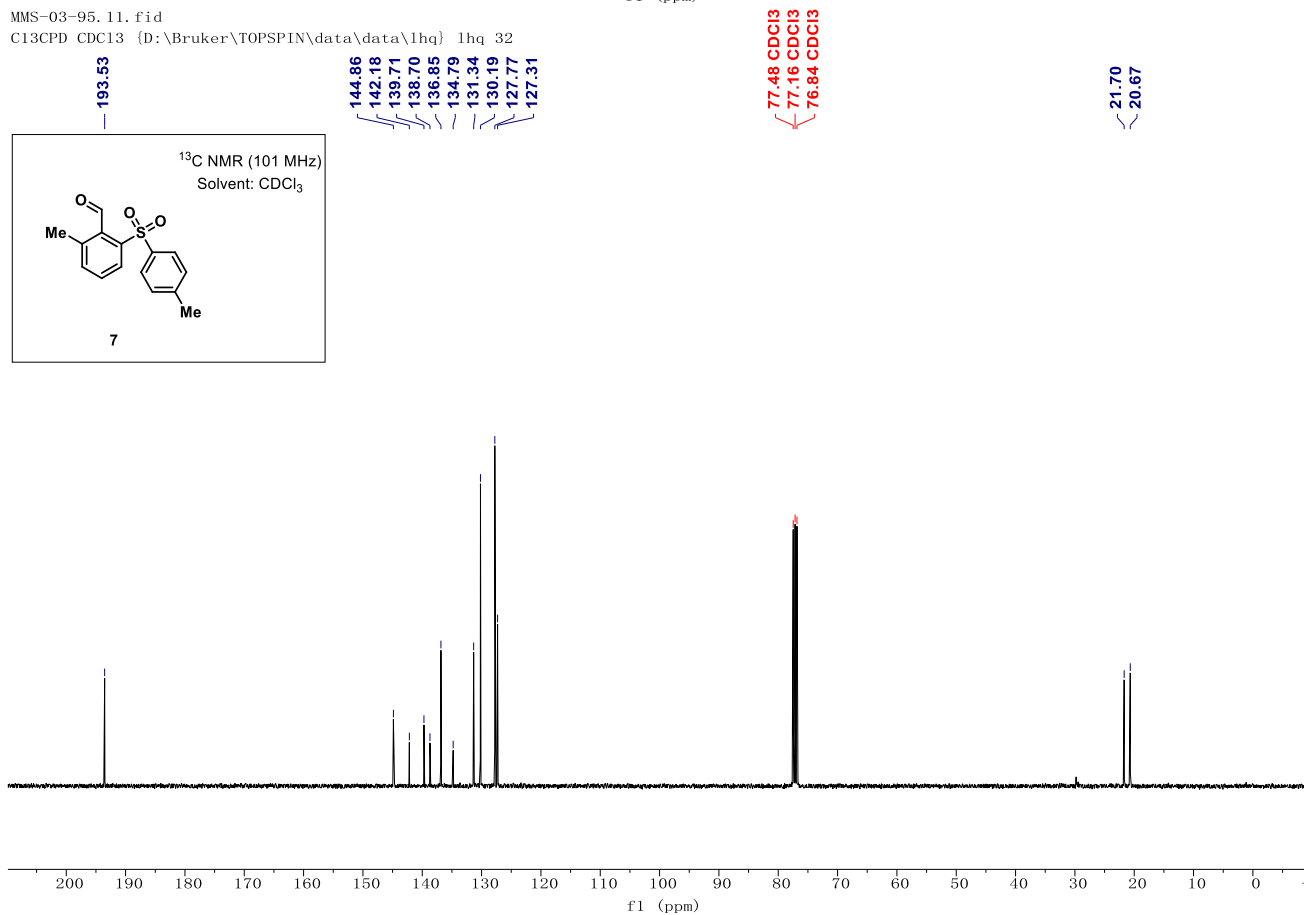



MMS-04-1121-1. 10. fid  
 PROTON CDC13 {D:\Bruker\TOPSPIN\data\data\zyh}

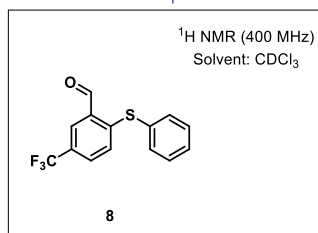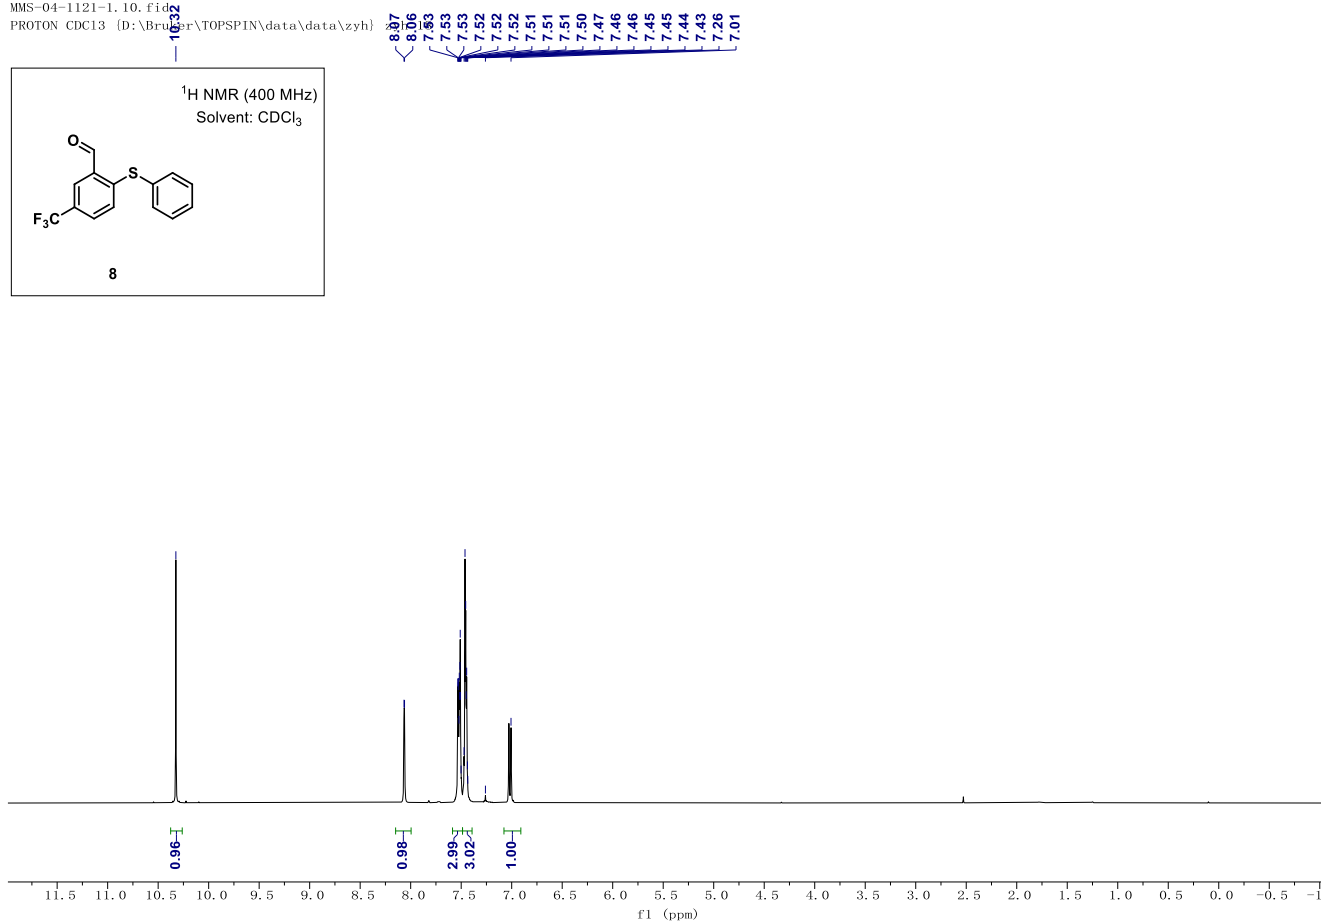

MMS-04-1121-1. 20. fid  
 C13CPD CDC13 {D:\Bruker\TOPSPIN\data\data\zyh} zyh 36

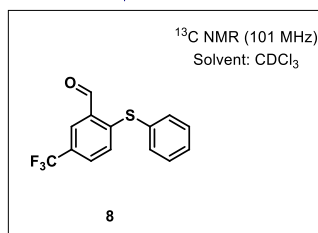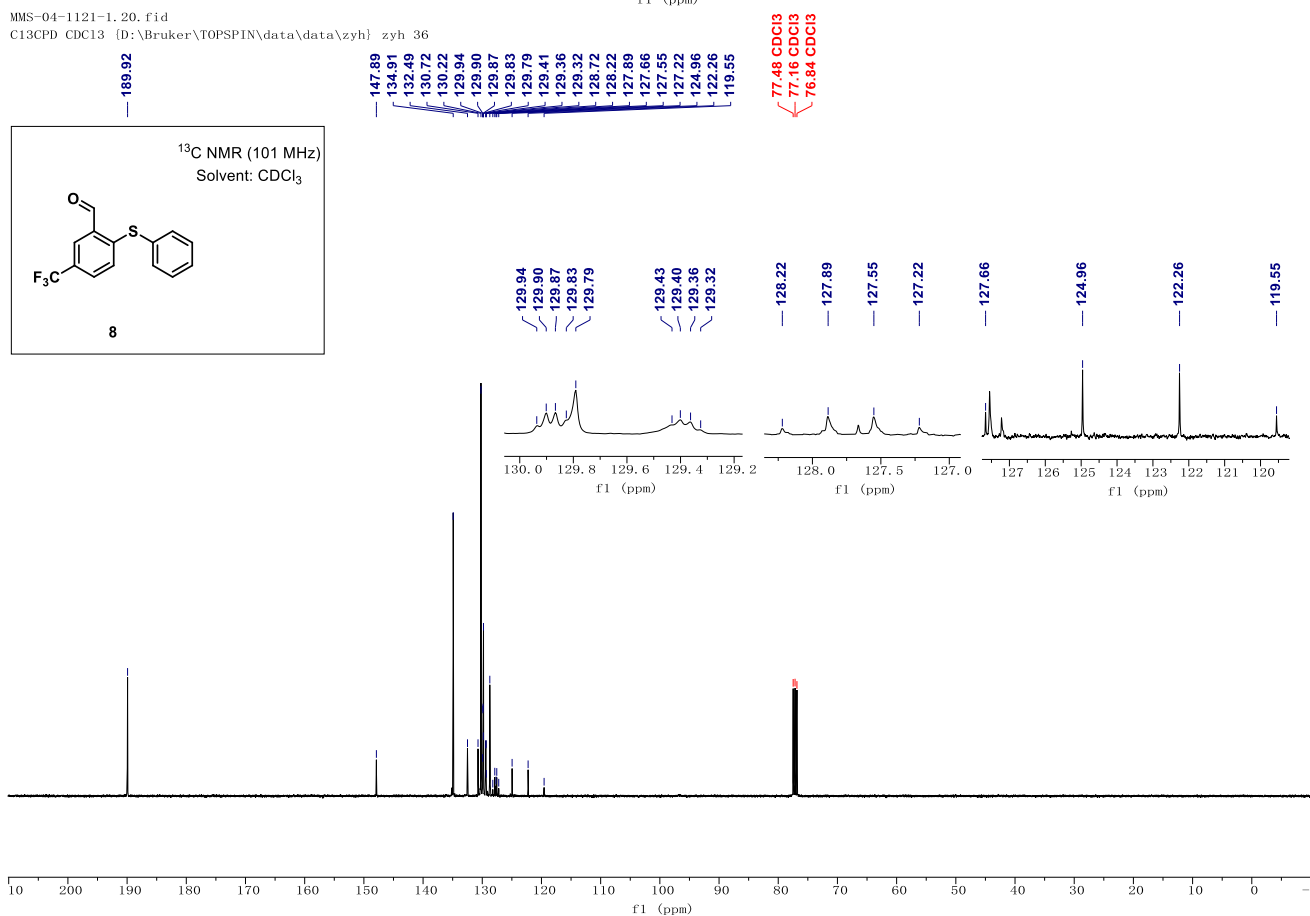

MMS-04-1121-1. 21. fid  
F19CPD CDC13 {D:\Bruker\TOPSPIN\data\data\zyh} zyh 36

-62.72

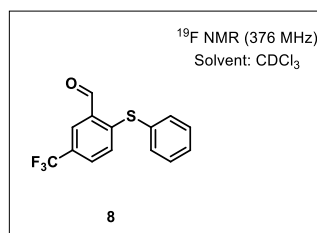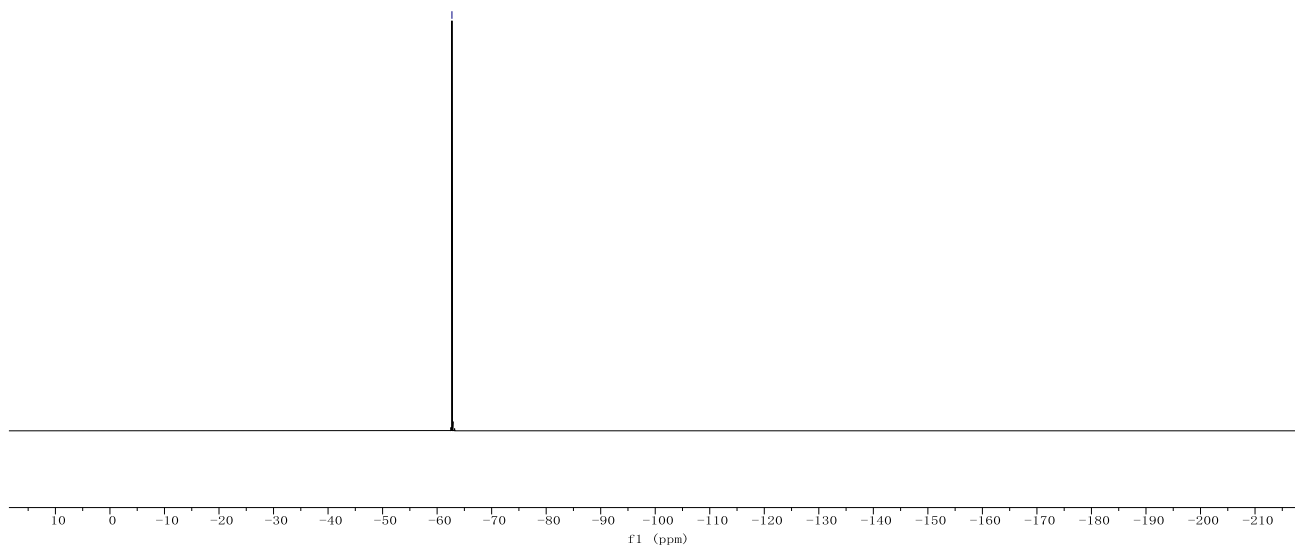

MMS-04-88F. 10. fid  
 PROTON CDCl3 (D:\Bruker\TOPSPIN\data\data\zyh\ zyh 32

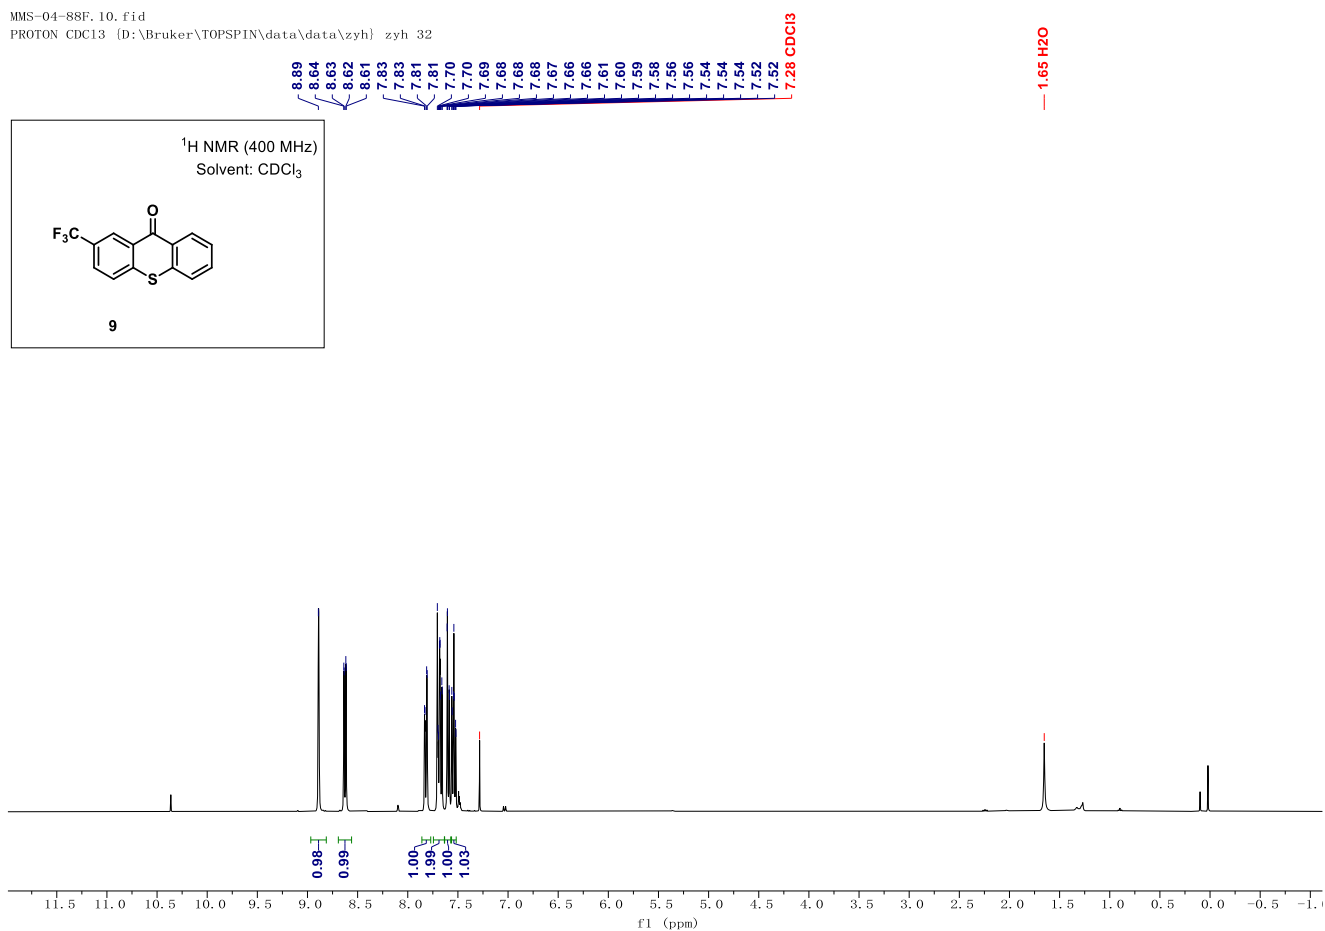

MMS-04-88F. 11. fid  
 C13CPD CDCl3 (D:\Bruker\TOPSPIN\data\data\zyh\ zyh 32

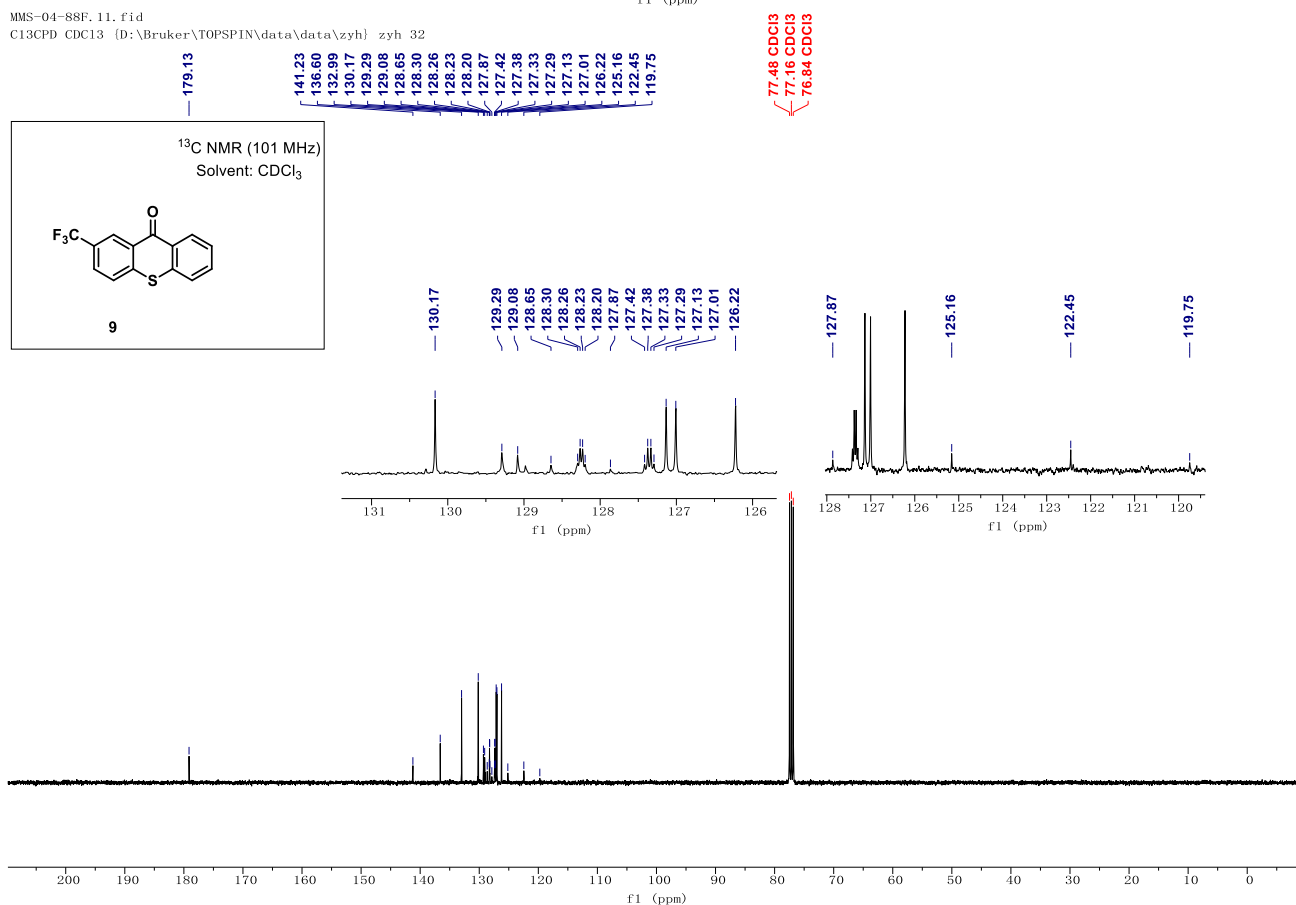

MMS-04-88F. 12. fid  
F19CPD CDC13 (D:\Bruker\TOPSPIN\data\data\zyh) zyh 32

-62.59

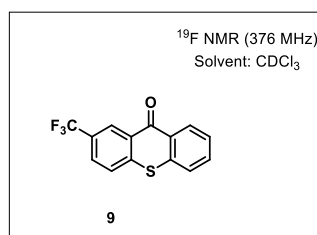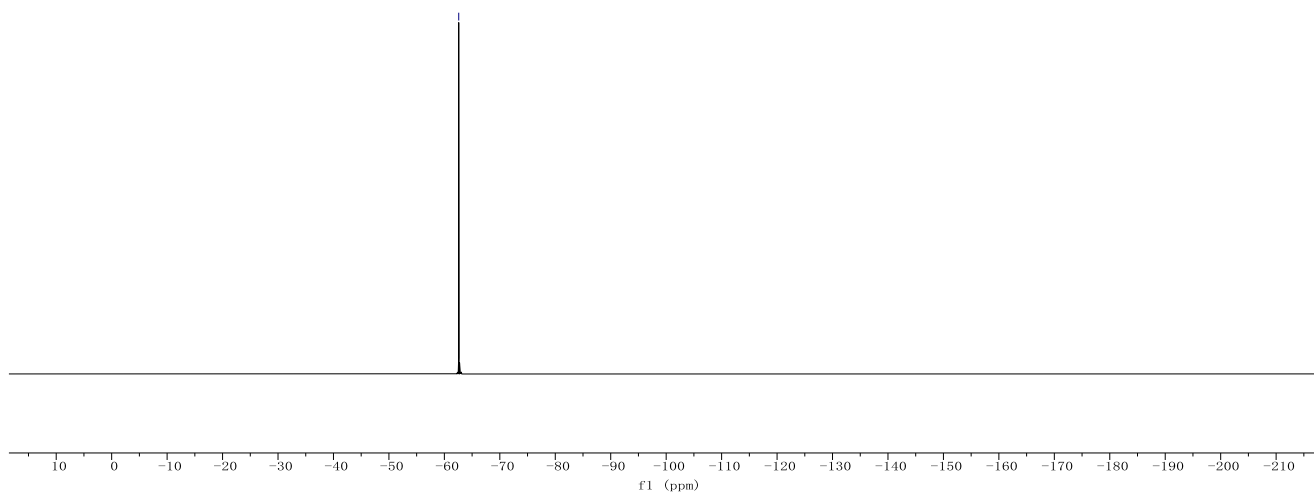

mms-04-89a.10.fid  
 PROTON CDCl3 {D:\Bruker\TOPSPIN\data\data\1hq} 1h3 35

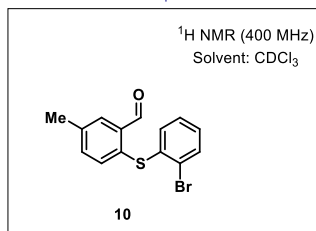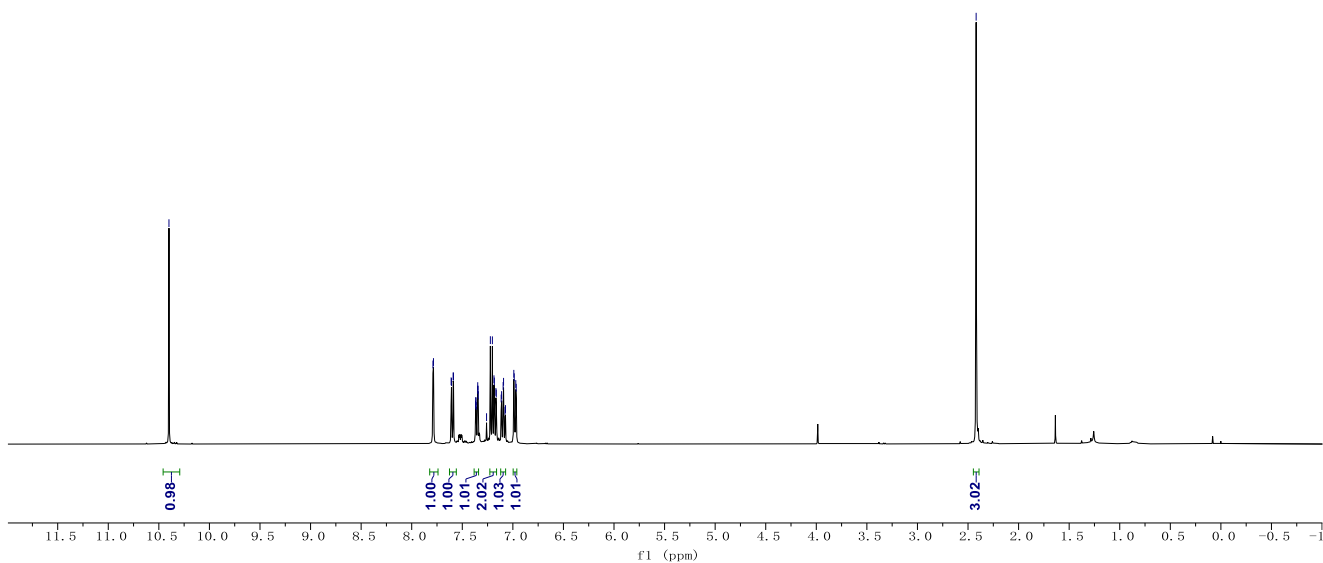

mms-04-89a.11.fid  
 C13CPD CDCl3 {D:\Bruker\TOPSPIN\data\data\1hq} 1h3 35

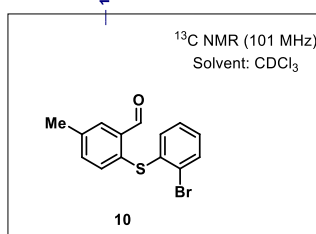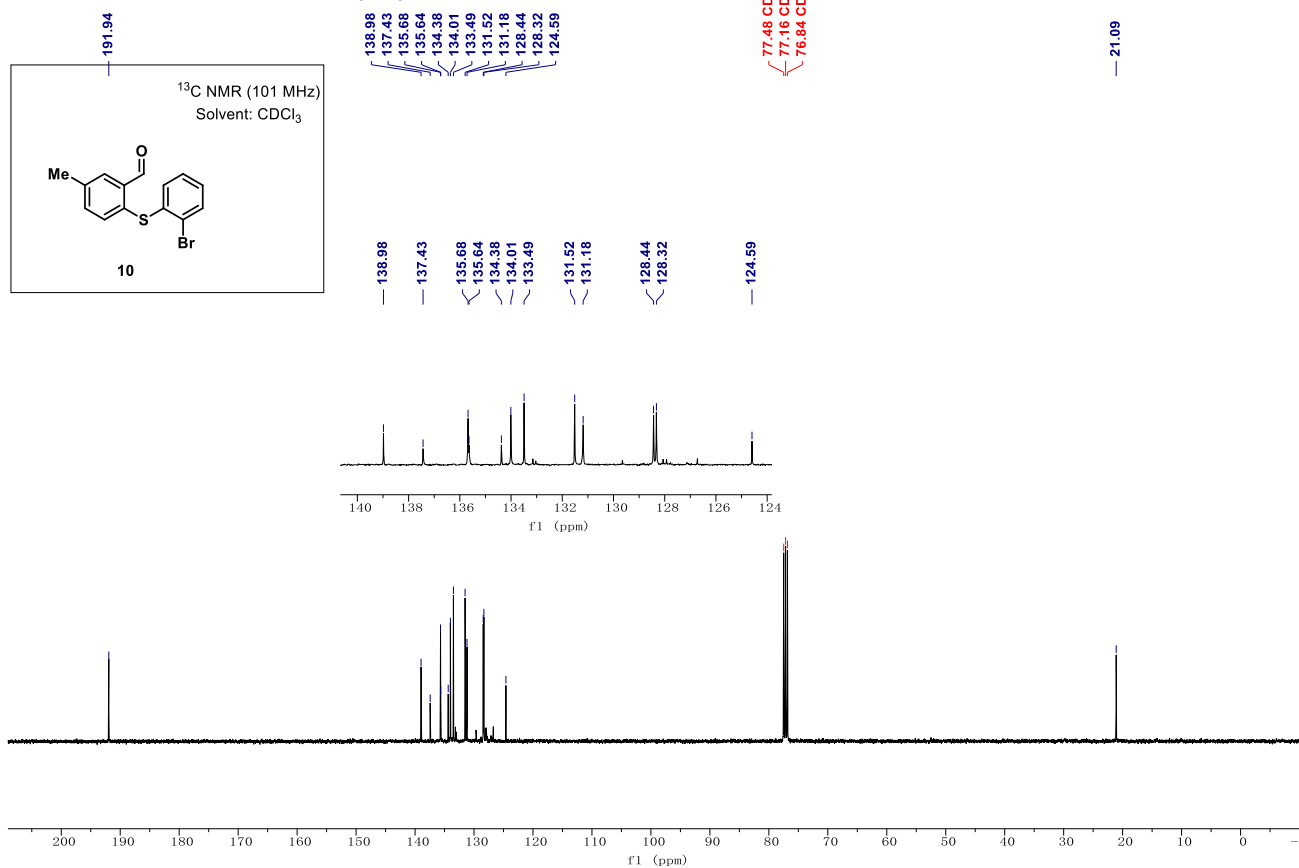

MMS-04-90.10.fid  
 PROTON CDC13 {D:\Bruker\TOPSPIN\data\data\lhq} lhq 33

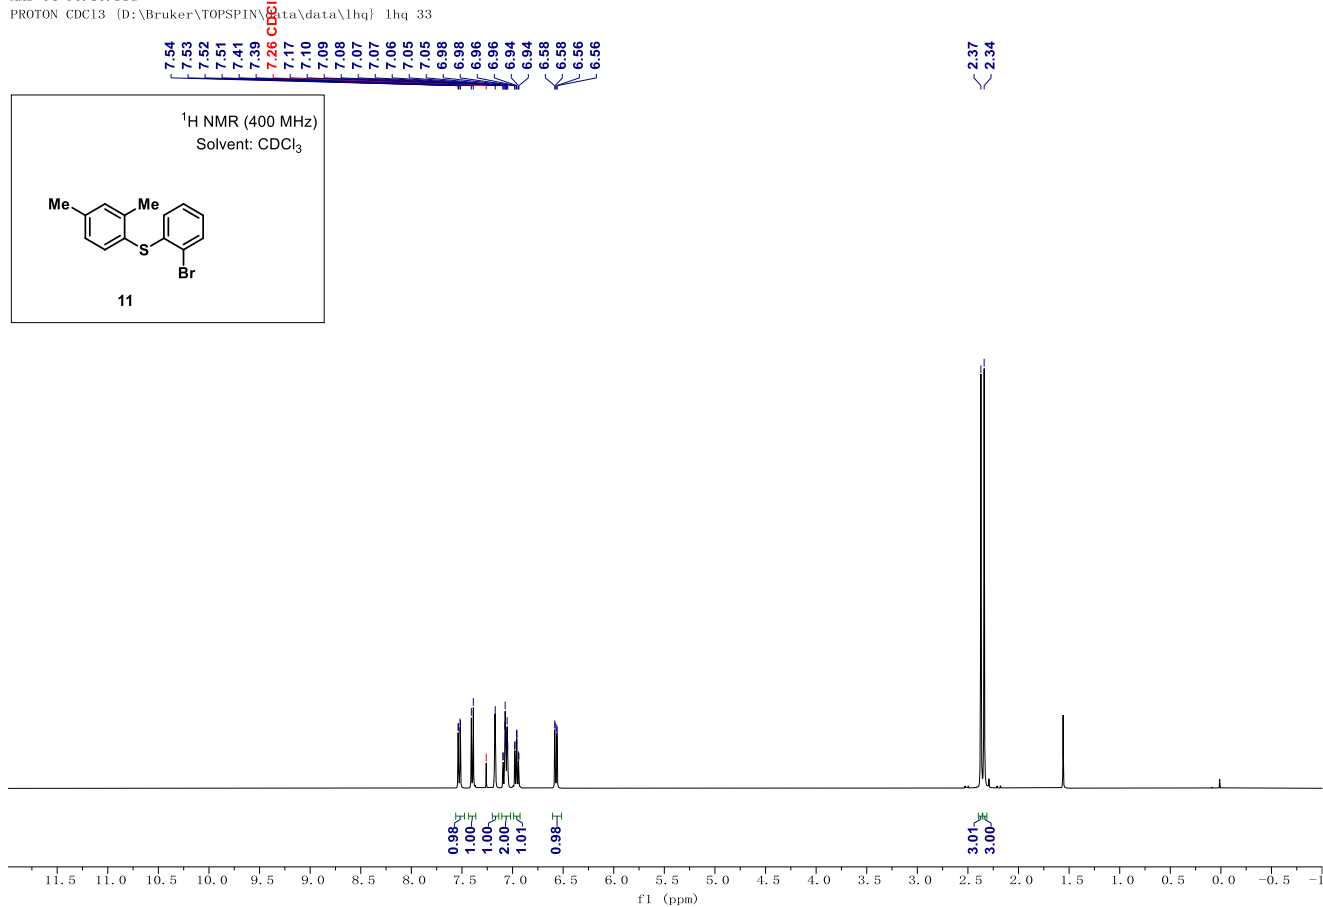

MMS-04-90.11.fid  
 C13CPD CDC13 {D:\Bruker\TOPSPIN\data\data\lhq} lhq 33

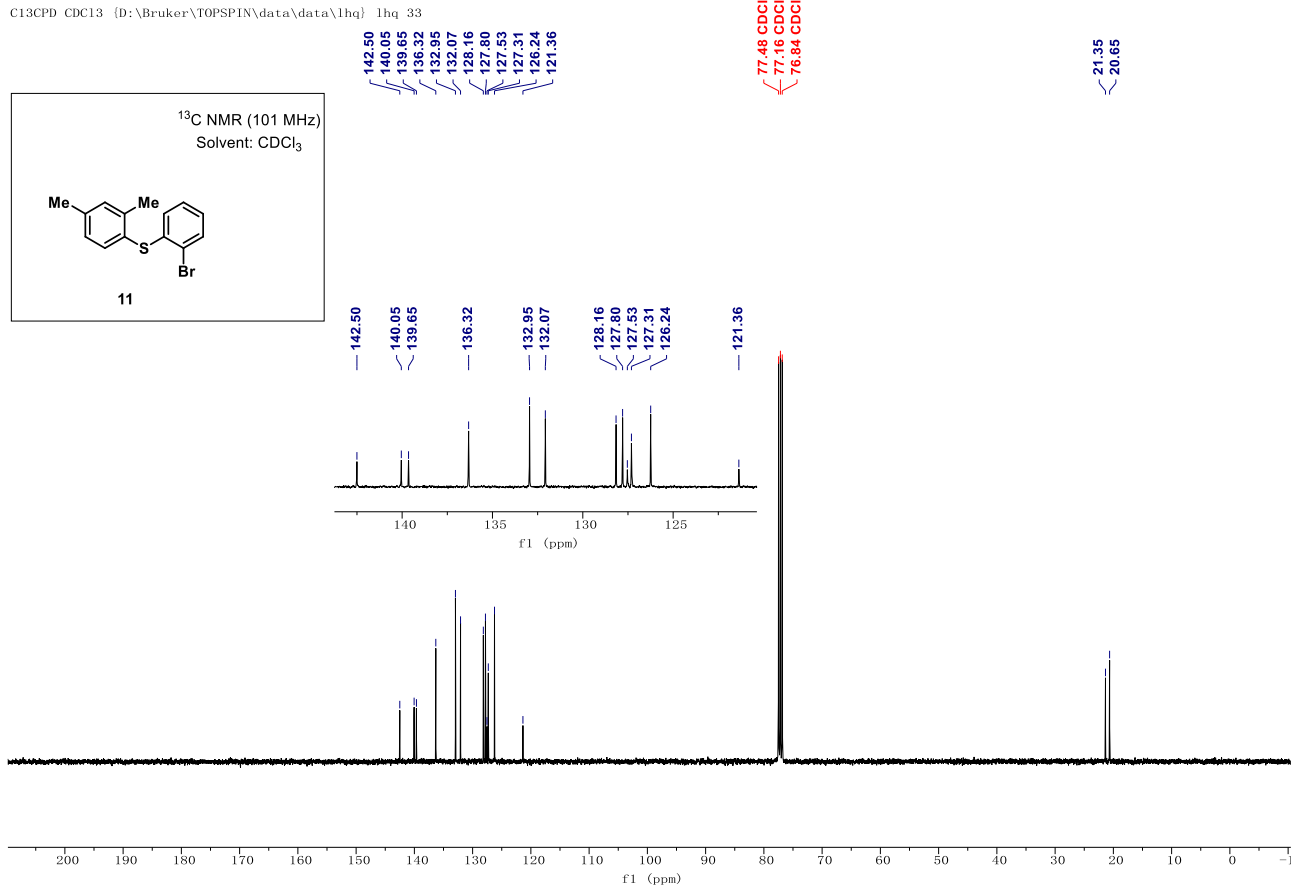

Supplement: d5qo00472a1.pdf [file d5qo00472a1.pdf]
